# Supplementary material for: Association Mapping of Flowering Time QTLs and Insight into Their Contributions to Rapeseed Growth Habits
Source: Front Plant Sci. 2016 Mar 24;7:338. doi: 10.3389/fpls.2016.00338 (PMC4805649; doi:10.3389/fpls.2016.00338)
Supplement: Supplementary file 1 [file Table1.XLSX]

## Sheet: Sheet1
Table S1. Rapeseed accessions and their information in this study
Accession number	Inbred lines/Cultivars	Countries	Growth types	YL2013 (mean)	YL2013 (sd)	WH2013	JX2007 (mean)	JX2007 (sd)	JX2012 (mean)	JX2012 (sd)
1182	Shengliqinggeng	China	Semi-winter	175	2.82843	N/A	N/A	N/A	170	3.60555
1192	23hao Youcai	China	Semi-winter	167	1.41421	157	N/A	N/A	163	3.60555
1193	Huyou2	China	Semi-winter	172	1.41421	159	163	3.60555	163	4
1197	Shaoyeqing	China	Semi-winter	164.5	3.53553	156	167	4	161	3.60555
1200	Shangyou1	China	Semi-winter	173.5	0.707107	163	167	3.60555	167	3.60555
1203	92	China	Semi-winter	172.5	0.707107	162	N/A	N/A	167	4
1212	Ningyou1	China	Semi-winter	168.5	0.707107	156	163	3.60555	163	3.60555
1216	Ningyou5	China	Semi-winter	169	0	157	165	4	163	3.60555
1218	Dahuaqiu	China	Semi-winter	168	0	155	163	3.60555	155	4
1221	zaofeng1	China	Semi-winter	148	4.24264	142	N/A	N/A	155	3.60555
1222	363	China	Semi-winter	156	1.41421	152	158	3.60555	163	3.60555
1228	Ganyou2	China	Semi-winter	166	0	157	163	4	165	4
1237	Huayou3	China	Semi-winter	158	1.41421	149	161	3.60555	155	3.60555
1240	Huayou8	China	Semi-winter	147	4.24264	146	N/A	N/A	155	3.60555
1241	Huayou9	China	Semi-winter	153	0	158	161	3.60555	163	4
1243	Huayou12	China	Semi-winter	161	2.82843	156	165	4	157	3.60555
1263	Chaunyou2	China	Semi-winter	157.5	0.707107	152	158	3.60555	155	3.60555
1264	Chuannongchangjiao	China	Semi-winter	162	1.41421	156	N/A	N/A	160	4
1280	Xinan302	China	Semi-winter	164	2.82843	154	N/A	N/A	155	3.60555
1284	luzhou5	China	Semi-winter	165	0	159	N/A	N/A	160	3.60555
1287	Yiyou3	China	Semi-winter	160	2.82843	148	158	3.60555	155	4
1307	Yunyou7	China	Semi-winter	115	0	125	158	4	136	3.60555
1309	Yunyou49	China	Semi-winter	143	11.3137	148	N/A	N/A	155	3.60555
1311	qingyou8	China	Spring	136.5	2.12132	152	158	3.60555	155	4
1334	Shengli Youcai	Japan	Winter	167	1.41421	153	N/A	N/A	160	3.60555
1339	Chikuzen	Japan	Winter	161	5.65685	156	162	3.60555	155	3.60555
1341	Norin18	Japan	Winter	170	0	159	165	4	163	4
1342	Norin20	Japan	Winter	161.5	4.94975	157	162	3.60555	155	3.60555
1343	Wase Cyousenn	Japan	Winter	168	1.41421	158	161	3.60555	160	3.60555
1345	Zephyr	Canada	Spring	171	1.41421	159	162	4	167	4
1346	Midasi	Canada	Spring	160	7.07107	157	162	3.60555	155	3.60555
1347	Turret	Canada	Spring	132.5	3.53553	151	159	3.60555	155	3.60555
1348	ORO	Canada	Spring	160.5	4.94975	149	N/A	N/A	155	4
1349	Canadian1	Canada	Spring	163	2.82843	154	158	4	163	3.60555
1350	Canadian2	Canada	Spring	166.5	2.12132	158	164	3.60555	160	3.60555
1356	Italy rapeseed	Italy	Winter	176.5	0.707107	163	164	3.60555	167	4
1357	Soviet	Russia	Winter	164.5	0.707107	157	163	4	160	3.60555
1360	Poland(2)	Poland	Winter	180	0	NA	173	3.60555	163	3.60555
1362	Mtochowski	Poland	Winter	169	0	155	161	3.60555	160	4
1365	Giant	UK	Winter	N/A	0	NA	162	4	165	3.60555
1366	Giant	UK	Winter	163.5	2.12132	152	165	3.60555	160	3.60555
1368	England Short	UK	Winter	167.5	2.12132	157	161	3.60555	160	4
1370	Major	France	Winter	168	0	157	163	4	160	3.60555
1373	Primor	France	Winter	165	4.24264	154	N/A	N/A	160	3.60555
2638	Luojingxuanxi	China	Semi-winter	173.5	0.707107	162	166	3.60555	167	4
2639	Caoyou2	China	Semi-winter	166.5	0.707107	157	161	3.60555	163	3.60555
2646	82-2524	China	Semi-winter	179	0	NA	N/A	N/A	175	3.60555
2649	Xinghuangha	China	Semi-winter	162	1.41421	152	159	4	160	4
2653	Youguangye	China	Semi-winter	173.5	0.707107	160	168	3.60555	167	3.60555
2665	78251	China	Semi-winter	145.5	10.6066	152	158	3.60555	155	3.60555
2672	Zheyouyou1	China	Semi-winter	177	0	164	160	4	169	4
2679	Yang2008	China	Semi-winter	176.5	0.707107	163	164	3.60555	167	3.60555
2680	Yangyou1	China	Semi-winter	166.5	7.77817	158	164	3.60555	163	3.60555
2683	Sui1-4	China	Semi-winter	170	0	156	165	4	163	4
2686	Quanzi	China	Semi-winter	173	0	160	168	3.60555	163	3.60555
2692	Bf10	China	Spring	172	0	158	164	3.60555	163	3.60555
2693	Bf10(A)	China	Spring	175.5	0.707107	163	161	4	169	4
2700	3209	China	Semi-winter	171	0	159	162	3.60555	165	3.60555
2714	Guangde741	China	Semi-winter	167.5	0.707107	158	162	3.60555	163	3.60555
2719	698-141	China	Semi-winter	167	1.41421	156	162	4	160	4
2734	2734	Italy	Winter	168.5	0.707107	159	N/A	N/A	160	3.60555
2738	Zaofeng4	China	Spring	170	0	156	160	3.60555	163	3.60555
2741	Ningqingyuquanba	China	Semi-winter	165	0	154	161	3.60555	163	4
2769	7902	China	Winter	171.5	2.12132	161	163	4	165	3.60555
2775	Nanyang41	China	Winter	164.5	4.94975	150	N/A	N/A	160	3.60555
2776	Kai07	China	Winter	172	0	158	163	3.60555	165	4
2779	Xinglong1	China	Winter	168	1.41421	157	163	3.60555	160	3.60555
2784	51	China	Winter	153.5	3.53553	146	157	4	155	3.60555
2785	Zhengyou1	China	Winter	155.5	2.12132	154	162	3.60555	155	4
2786	Heyou1	China	Winter	169	1.41421	157	162	3.60555	165	3.60555
2787	Ganyou5	China	Semi-winter	166	0	155	N/A	N/A	160	3.60555
2789	Zhongyou821	China	Semi-winter	168.5	0.707107	158	N/A	N/A	160	4
2793	Ligele-1	China	Semi-winter	174.5	0.707107	163	169	4	167	3.60555
2821	Huayou16	China	Semi-winter	162.5	3.53553	146	158	3.60555	155	3.60555
2823	Huahuang1	China	Semi-winter	164	1.41421	151	161	3.60555	160	4
2825	Xiangyou5	China	Semi-winter	166	0	154	N/A	N/A	155	3.60555
2837	Erhuab	China	Semi-winter	179	0	NA	170	4	173	3.60555
2840	57A	China	Semi-winter	169	1.41421	159	160	3.60555	160	4
2873	6024-2	China	Semi-winter	159	1.41421	151	159	3.60555	163	3.60555
2874	6012-1	China	Semi-winter	91.5	2.12132	120	157	4	155	3.60555
2875	6024-1	China	Semi-winter	159	1.41421	149	159	3.60555	155	4
2889	78007	China	Semi-winter	157.5	2.12132	152	156	3.60555	155	3.60555
2890	36220	China	Semi-winter	159.5	2.12132	150	156	4	155	3.60555
2893	4050-4149	China	Semi-winter	161	2.82843	157	160	3.60555	155	4
2894	77054-2	China	Semi-winter	168	0	154	163	3.60555	163	3.60555
2897	4350-4449	China	Semi-winter	155.5	0.707107	146	156	4	155	3.60555
2904	84-3	China	Semi-winter	166.5	0.707107	155	158	3.60555	160	4
2905	86-4	China	Semi-winter	162.5	3.53553	151	156	3.60555	155	3.60555
2912	3145-60	China	Semi-winter	161	1.41421	152	159	4	155	3.60555
2914	Eh3143	China	Semi-winter	163	1.41421	156	160	3.60555	155	4
2917	4092	China	Semi-winter	156	1.41421	151	157	3.60555	155	3.60555
2923	2W019	China	Semi-winter	168	0	151	160	4	155	3.60555
2924	3W042	China	Semi-winter	162	0	149	157	3.60555	155	4
2972	Yueyang84-8	China	Semi-winter	151.5	6.36396	144	N/A	N/A	155	3.60555
3043	Binyou1	China	Semi-winter	166	0	155	162	3.60555	155	3.60555
3049	83008	China	Semi-winter	172.5	0.707107	160	159	4	167	4
3050	408-8	China	Semi-winter	171.5	2.12132	160	161	3.60555	165	3.60555
3065	84-57	China	Semi-winter	162	4.24264	155	155	3.60555	160	3.60555
3067	72-2	China	Semi-winter	159.5	4.94975	148	158	4	155	4
3068	74-317	China	Semi-winter	138	4.24264	141	157	3.60555	155	3.60555
3074	Jinyou15	China	Semi-winter	158	4.24264	151	160	3.60555	163	3.60555
3078	Piyou23	China	Semi-winter	170.5	2.12132	158	157	4	163	4
3086	213	China	Semi-winter	140	1.41421	142	156	3.60555	155	3.60555
3100	Yunyou11	China	Semi-winter	166.5	0.707107	156	156	3.60555	155	3.60555
3101	Yunyou12	China	Semi-winter	137	2.82843	135	157	4	155	4
3107	Hongqiaoyou1	China	Semi-winter	140.5	3.53553	137	156	3.60555	155	3.60555
3109	Fuyou1	China	Spring	159.5	0.707107	153	158	3.60555	155	3.60555
3112	Meijian	China	Spring	165	0	162	159	4	163	4
3115	Fuyou4	China	Spring	N/A	N/A	NA	159	3.60555	N/A	N/A
3236	Dong-Hae23	Japan	Winter	168	0	151	163	3.60555	155	3.60555
3237	Kojo 35	Japan	Winter	164.5	4.94975	151	158	4	163	3.60555
3238	Kojo 57	Japan	Winter	164.5	4.94975	155	162	3.60555	155	4
3239	Norin 34	Japan	Winter	171	0	162	163	3.60555	163	3.60555
3240	Ganpol	Japan	Winter	175.5	0.707107	163	N/A	N/A	169	3.60555
3242	Isuzu	Japan	Winter	172	0	157	163	4	160	4
3244	Aomori	Japan	Winter	175.5	0.707107	162	164	3.60555	163	3.60555
3245	Norin16	Japan	Winter	162	1.41421	157	164	3.60555	169	3.60555
3246	Norin 25	Japan	Winter	171	1.41421	158	163	4	169	4
3248	Dong-Hae16	Japan	Winter	165	9.89949	142	158	3.60555	155	3.60555
3251	Semuda 16/81	Canada	Spring	138	0	138	161	3.60555	155	3.60555
3253	Golda	Canada	Spring	N/A	0	NA	164	4	177	4
3254	Narc	Pakistan	Winter	169.5	0.707107	159	162	3.60555	167	3.60555
3258	Changranyoucai-2	North Korea	Winter	175.5	0.707107	163	169	3.60555	182	3.60555
3260	Rongshanyoucai	North Korea	Winter	N/A	0	NA	164	4	165	4
3262	Superlati-Velot601	New Zealand	Winter	171.5	0.707107	158	164	3.60555	171	3.60555
3263	Rangi	New Zealand	Winter	N/A	N/A	NA	175	3.60555	167	3.60555
3264	Ab448	Australia	Spring	167.5	0.707107	157	163	4	165	4
3268	RV3	Australia	Spring	174	0	162	162	3.60555	169	3.60555
3269	Liraglu	Australia	Winter	177	0	NA	170	3.60555	163	3.60555
3272	Bln241	Australia	Spring	173	0	161	162	4	167	4
3274	Bln247	Australia	Spring	176.5	0.707107	NA	163	3.60555	149	3.60555
3275	DH9-2	Australia	Spring	134.5	0.707107	142	164	3.60555	160	3.60555
3276	Rv6	Australia	Spring	162	1.41421	159	165	4	167	4
3277	Rv7	Australia	Spring	174.5	0.707107	161	163	3.60555	149	3.60555
3279	Ru6	Australia	Spring	178	0	NA	167	3.60555	160	3.60555
3282	Wesreo	Australia	Spring	167	0	153	163	4	163	4
3283	Wesroona	Australia	Spring	162	1.41421	157	164	3.60555	155	3.60555
3285	73N22-1	Australia	Spring	170	0	157	164	3.60555	155	3.60555
3286	Wesbrook	Australia	Spring	164.5	2.12132	152	162	4	155	4
3289	Dandi	Denmark	Spring	175.5	0.707107	NA	169	3.60555	167	3.60555
3290	Ujfertadi	Hungary	Winter	N/A	N/A	NA	163	3.60555	167	3.60555
3291	Ujfertadi	Hungary	Winter	174	0	160	169	4	169	4
3292	Savaria	Hungary	Winter	162	1.41421	154	164	3.60555	155	3.60555
3293	H19	Hungary	Winter	178.5	0.707107	NA	172	3.60555	169	3.60555
3296	Liradonne	Germany	Winter	N/A	0	NA	175	4	178	4
3298	NPZ	Germany	Winter	N/A	0	NA	176	3.60555	178	3.60555
3303	Lesira	Germany	Winter	181	0	NA	173	3.60555	173	3.60555
3304	Expander	Germany	Winter	174	0	162	170	4	165	4
3305	Erra	Germany	Winter	N/A	0	NA	170	3.60555	175	3.60555
3306	Quinta	Germany	Winter	177.5	0.707107	NA	168	3.60555	170	3.60555
3307	Ledos	Germany	Winter	169.5	3.53553	159	170	4	165	4
3308	Ligora	Germany	Winter	177.5	0.707107	NA	165	3.60555	167	3.60555
3309	Librador	Germany	Winter	179	0	NA	174	3.60555	173	3.60555
3312	Eaglu	Germany	Winter	N/A	0	NA	173	4	176	4
3313	Rucabo	Germany	Spring	179	0	NA	173	3.60555	169	3.60555
3319	Dsv-Sr50	Germany	Winter	172	0	161	161	3.60555	167	3.60555
3320	Liglandor	Germany	Winter	176	0	NA	170	4	171	4
3321	Wiama	Germany	Winter	170	0	NA	170	3.60555	169	3.60555
3323	Doral	Germany	Winter	173	0	NA	173	3.60555	175	3.60555
3328	77N	Germany	Winter	N/A	0	NA	170	4	175	4
3329	H4	Germany	Winter	176	0	163	167	3.60555	167	3.60555
3332	H7	Germany	Winter	N/A	0	NA	177	3.60555	176	3.60555
3333	H8	Germany	Winter	161	0	144	168	4	163	4
3335	H10	Germany	Winter	N/A	0	NA	172	3.60555	176	3.60555
3336	H13	Germany	Winter	177	0	NA	168	3.60555	169	3.60555
3338	H15	Germany	Winter	178.5	0.707107	NA	170	4	173	4
3341	H18	Germany	Winter	N/A	0	NA	173	3.60555	175	3.60555
3344	H22	Germany	Winter	173	1.41421	161	170	3.60555	169	3.60555
3345	H26	Germany	Winter	162	0	157	168	4	155	4
3346	H29	Germany	Winter	177	0	161	171	3.60555	169	3.60555
3348	H31	Germany	Winter	N/A	0	NA	171	3.60555	173	3.60555
3349	H32	Germany	Winter	177	0	NA	173	4	169	4
3351	Sollux	Germany	Winter	171.5	0.707107	159	168	3.60555	160	3.60555
3356	P27	Germany	Winter	N/A	0	NA	168	3.60555	175	3.60555
3358	HJa81839	Finland	Spring	176	0	NA	162	4	167	4
3359	HJa82414	Finland	Spring	150	1.41421	149	161	3.60555	155	3.60555
3360	Hja 82470	Finland	Spring	171.5	0.707107	159	160	3.60555	160	3.60555
3361	Hja 82703	Finland	Spring	166.5	4.94975	162	155	4	155	4
3362	Hja 82708	Finland	Spring	162	1.41421	151	156	3.60555	155	3.60555
3363	HJa82799	Finland	Winter	175.5	0.707107	163	160	3.60555	169	3.60555
3365	H43	Russia	Winter	170	1.41421	162	160	4	163	4
3366	H44	Russia	Winter	177	0	163	165	3.60555	167	3.60555
3367	H45	Russia	Winter	177	0	163	169	3.60555	167	3.60555
3368	H46	Russia	Winter	176	0	161	174	4	169	4
3369	H47	Russia	Winter	177	0	NA	175	3.60555	176	3.60555
3370	H48	Russia	Winter	N/A	0	NA	174	3.60555	160	3.60555
3371	H49	Russia	Winter	175.5	0.707107	163	167	4	165	4
3374	Janpol	Poland	Winter	N/A	0	NA	175	3.60555	175	3.60555
3376	Gorczanski	Poland	Winter	176.5	0.707107	NA	170	3.60555	167	3.60555
3377	START	Poland	Winter	176.5	0.707107	163	174	4	167	4
3378	Tripol	Poland	Winter	161.5	0.707107	142	173	3.60555	129	3.60555
3379	Libra	Poland	Winter	170	2.82843	157	163	3.60555	160	3.60555
3381	P6	Poland	Winter	163.5	0.707107	153	163	4	160	4
3382	P7	Poland	Winter	162.5	0.707107	144	161	3.60555	155	3.60555
3383	H38	Poland	Winter	179.5	0.707107	NA	170	3.60555	171	3.60555
3384	H39	Poland	Winter	173.5	0.707107	161	165	4	165	4
3385	Bronowski	Poland	Spring	N/A	0	NA	164	3.60555	171	3.60555
3386	Mikado	UK	Winter	176	1.41421	NA	168	3.60555	167	3.60555
3388	77-258	UK	Winter	168	0	156	164	4	155	4
3389	77-257-5	UK	Winter	167	0	159	161	3.60555	155	3.60555
3390	Gonda	Canada	Winter	175	0	163	161	3.60555	167	3.60555
3391	Holand Black	Poland	Winter	N/A	0	NA	174	4	175	4
3393	H56	UK	Winter	164	5.65685	161	166	3.60555	160	3.60555
3394	Mochowski	France	Winter	167.5	0.707107	161	161	3.60555	155	3.60555
3396	Nachan	France	Winter	164.5	3.53553	144	165	4	155	4
3397	Rapora	Germany	Winter	N/A	0	NA	177	3.60555	178	3.60555
3398	Prota 3129	France	Spring	145.5	0.707107	156	161	3.60555	155	3.60555
3399	Remeo	France	Spring	172.5	0.707107	161	163	4	160	4
3401	Sedo-10	France	Spring	159.5	2.12132	149	160	3.60555	155	3.60555
3404	Topas-15	France	Spring	174	2.82843	163	163	3.60555	165	3.60555
3415	Line	France	Spring	173	0	163	163	4	167	4
3417	Lingot	France	Spring	173.5	0.707107	162	N/A	N/A	167	3.60555
3427	H25	France	Winter	176.5	0.707107	162	170	3.60555	165	3.60555
3439	Cresor	France	Spring	N/A	0	NA	165	3.60555	160	4
3441	Awoer	France	Spring	150	0	148	166	4	155	3.60555
3443	Tantaer	France	Spring	173.5	0.707107	161	165	3.60555	163	3.60555
3447	P17	France	Spring	168	0	152	162	3.60555	155	4
3450	Wipot	Norway	Spring	166	0	152	163	4	155	3.60555
3452	Koolzaad-2	Holand	Winter	178.5	0.707107	NA	169	3.60555	171	3.60555
3453	Koolzaad-3	Holand	Winter	176	0	163	170	3.60555	167	4
3454	Koolzaad-4	Holand	Winter	N/A	0	NA	170	4	173	3.60555
3455	H40	Chech	Winter	N/A	0	NA	169	3.60555	171	3.60555
3456	H41	Chech	Winter	N/A	0	NA	167	3.60555	173	4
3457	P11	Chech	Winter	172.5	0.707107	161	163	4	163	3.60555
3458	Sv.Niklas	Sweden	Spring	162	0	157	164	3.60555	160	3.60555
3461	Sv.0321	Sweden	Winter	176	0	NA	167	3.60555	167	4
3464	Omega	Sweden	Spring	168	1.41421	162	163	4	160	3.60555
3469	Ww 1307	Sweden	Spring	177.5	0.707107	NA	165	3.60555	169	3.60555
3472	Olga	Sweden	Spring	167	1.41421	155	161	3.60555	155	4
3477	P9	Sweden	Spring	170	1.41421	163	162	4	160	3.60555
3478	P23	Sweden	Spring	163	0	147	162	3.60555	155	3.60555
3479	H23	Sweden	Spring	167	0	156	166	3.60555	155	4
3480	H24	Sweden	Winter	N/A	0	NA	174	4	155	3.60555
3481	H53	Sweden	Winter	178	2.82843	162	173	3.60555	176	3.60555
3482	H54	Sweden	Winter	175.5	0.707107	163	168	3.60555	167	4
3483	H55	Sweden	Spring	163.5	2.12132	159	164	4	155	3.60555
3484	Ww.Hanna	Sweden	Spring	173.5	0.707107	163	168	3.60555	163	3.60555
3485	Sv.Topas	Sweden	Spring	176	0	163	166	3.60555	167	4
3486	Sv.Tyko	Sweden	Spring	168	0	156	161	4	136	3.60555
3487	Sv.Global	Sweden	Spring	167	1.41421	159	N/A	N/A	163	3.60555
3488	Sv.02312	Sweden	Spring	138	4.24264	148	162	3.60555	123	4
3489	Wester Zn6-2836	Canada	Spring	166	0	154	155	3.60555	155	3.60555
3491	Regent	Canada	Spring	177	0	163	163	4	167	3.60555
3492	Tower	Canada	Spring	173	0	161	163	3.60555	160	4
3494	Altex	Sweden	Spring	168	0	157	159	3.60555	155	3.60555
3495	Andor	Sweden	Spring	157	0	151	163	4	155	3.60555
3497	P3	Sweden	Spring	159.5	12.0208	150	162	3.60555	155	4
3499	P25	Sweden	Spring	171.5	0.707107	157	163	3.60555	163	3.60555
3500	P26	Sweden	Spring	170.5	0.707107	157	163	4	160	3.60555
3502	Bok.Wok 13	USA	Spring	174.5	0.707107	163	165	3.60555	167	4
3503	Dac Chosen	USA	Spring	151.5	3.53553	146	165	3.60555	149	3.60555
3504	77-33	USA	Spring	175.5	0.707107	161	164	4	167	3.60555
3505	77-70	USA	Spring	176	0	164	163	3.60555	167	4
3507	79-186	USA	Spring	160.5	6.36396	155	163	3.60555	166	3.60555
3508	79-201	USA	Spring	170	0	157	161	4	155	3.60555
4480	Jie45	China	Semi-winter	171.5	0.707107	158	159	3.60555	163	4
4483	Jie65	China	Semi-winter	173	0	153	160	3.60555	163	3.60555
4486	87Jian2	China	Semi-winter	160.5	2.12132	149	162	4	155	3.60555
4489	Zheyouyou2	China	Semi-winter	161.5	2.12132	151	N/A	N/A	155	4
4503	8705	China	Semi-winter	165	1.41421	154	161	3.60555	155	3.60555
4512	Xingxuan2	China	Semi-winter	144.5	9.19239	153	162	3.60555	155	3.60555
4525	D19-5	China	Semi-winter	160	1.41421	149	162	4	149	4
4528	912	China	Semi-winter	159	0	148	163	3.60555	155	3.60555
4532	Baihua(2)	China	Semi-winter	150.5	12.0208	152	167	3.60555	149	3.60555
4533	Baihua(3)	China	Semi-winter	165.5	2.12132	159	163	4	155	4
4541	638	China	Winter	172.5	0.707107	159	167	3.60555	155	3.60555
4553	Zaofeng5	China	Semi-winter	177	0	161	164	3.60555	167	3.60555
4575	Yuyou2	China	Semi-winter	166.5	0.707107	153	N/A	N/A	155	4
4584	Qingtaipiang Yangyoucai	China	Semi-winter	164	2.82843	149	161	4	155	3.60555
4586	Zoumayang	China	Semi-winter	166	0	157	160	3.60555	155	3.60555
4588	Geleche Yangyoucai	China	Semi-winter	160.5	2.12132	154	158	3.60555	155	4
4601	85-1	China	Semi-winter	160.5	2.12132	156	157	4	155	3.60555
4603	88-4-43-1	China	Semi-winter	165.5	0.707107	153	156	3.60555	155	3.60555
4605	Zhongyoudijie1	China	Semi-winter	143	1.41421	140	N/A	N/A	149	4
4608	Zhongshuang1	China	Semi-winter	170	0	158	164	3.60555	163	3.60555
4624	18-8	China	Semi-winter	161.5	0.707107	149	155	4	155	3.60555
4625	88-161	China	Semi-winter	155.5	0.707107	150	157	3.60555	155	4
4626	Penglai1	China	Semi-winter	165.5	0.707107	154	162	3.60555	155	3.60555
4636	320	China	Semi-winter	164.5	0.707107	154	161	4	160	3.60555
4678	Ⅲ-227	China	Semi-winter	157.5	3.53553	147	163	3.60555	160	4
4679	Ⅲ-229	China	Semi-winter	159	2.82843	150	158	3.60555	155	3.60555
4708	88-2	China	Semi-winter	165	1.41421	154	161	4	160	3.60555
4711	86126-1-2	China	Semi-winter	146.5	6.36396	141	161	3.60555	160	4
4712	90-2	China	Semi-winter	N/A	N/A	NA	159	3.60555	155	3.60555
4713	870921-4	China	Semi-winter	161.5	0.707107	157	160	4	155	3.60555
4721	(一)63	China	Semi-winter	150	1.41421	148	158	3.60555	149	4
4755	86-18-Ⅱ-14	China	Semi-winter	157.5	0.707107	149	163	3.60555	149	3.60555
4767	Kaiyou1	China	Semi-winter	165	0	154	162	4	155	3.60555
4770	Youyan1	China	Semi-winter	172.5	0.707107	157	162	3.60555	155	4
4771	Youyan2	China	Semi-winter	140.5	0.707107	145	161	3.60555	136	3.60555
4773	2280249	China	Semi-winter	136	0	147	157	4	149	3.60555
4787	862	China	Semi-winter	175	0	161	157	3.60555	165	4
4793	87-9	China	Semi-winter	173	0	161	159	3.60555	165	3.60555
4796	90-2	China	Semi-winter	154	4.24264	142	157	4	160	3.60555
4811	83-258	China	Spring	75	0	115	163	3.60555	77	0
4812	Qiongguoqu	China	Spring	135	0	154	160	3.60555	77	4
4815	Qingyou12	China	Spring	173	0	162	N/A	N/A	163	3.60555
4818	85-15-3-1	China	Spring	140	0	147	162	4	149	3.60555
4822	Xuanma2	China	Spring	174	1.41421	161	163	3.60555	N/A	N/A
5049	Chikuzenn	Japan	Winter	166	0	156	N/A	N/A	160	4
5058	1-7	Japan	Winter	177	0	162	167	3.60555	167	3.60555
5067	Pivot	Canada	Spring	169.5	0.707107	159	164	4	163	3.60555
5068	Annick	South Korea	Winter	N/A	N/A	NA	162	3.60555	175	4
5073	Shiralee	Australia	Spring	136	0	142	N/A	N/A	149	3.60555
5075	Yic Kaden	Australia	Spring	173	0	161	162	3.60555	167	3.60555
5085	Optima	Denmark	Spring	136	0	147	160	4	129	4
5086	Wikki	Denmark	Spring	161.5	2.12132	157	162	3.60555	160	3.60555
5087	Viking	Denmark	Winter	175	0	163	164	3.60555	167	3.60555
5102	COBRA	Germany	Winter	172	0	159	N/A	0	163	4
5106	Parter	Germany	Winter	166	0	156	N/A	0	155	3.60555
5123	7300	Germany	Winter	177.5	0.707107	NA	174	4	167	3.60555
5126	7306	Germany	Winter	177.5	0.707107	NA	162	3.60555	169	4
5132	28669	Germany	Winter	173	0	161	165	3.60555	167	3.60555
5150	50202	Germany	Winter	163	1.41421	154	161	4	155	3.60555
5160	Falcon	Germany	Winter	176	0	163	N/A	0	165	4
5170	Koolzaand-2	Holand	Winter	173	0	161	162	3.60555	163	3.60555
5171	Sielecki	France	Spring	170	0	157	163	3.60555	163	3.60555
5173	Nevin	UK	Winter	167	0	157	N/A	N/A	155	4
5175	Ew-2	UK	Winter	180	0	NA	168	4	167	3.60555
5184	Samouran	France	Winter	162.5	0.707107	153	N/A	0	149	3.60555
5197	Roman-1	Holand	Winter	129	0	142	168	3.60555	160	4
5202	Tornado	Sweden	Spring	163	1.41421	159	N/A	N/A	155	3.60555
5209	Legend	Sweden	Spring	155	0	151	N/A	N/A	155	3.60555
5210	Grant	Sweden	Spring	172	0	152	N/A	N/A	149	4
5214	Topas.No. 6050	Sweden	Spring	136	0	154	167	3.60555	167	3.60555
5218	Celebra	Canada	Spring	175.5	0.707107	NA	163	4	160	3.60555
5226	Arabelle	Canada	Winter	177	0	163	170	3.60555	167	4
5227	Triton	Canada	Spring	173	0	159	163	3.60555	160	3.60555
5232	Profit	Canada	Spring	164	5.65685	158	163	4	155	3.60555
5233	Sel-W	Mexico	Spring	170	1.41421	NA	160	3.60555	167	4
5719	317	China	Semi-winter	173	0	154	165	3.60555	167	3.60555
5721	6084	China	Semi-winter	171.5	2.12132	159	163	4	167	3.60555
5726	93-2-2	China	Semi-winter	169.5	0.707107	156	164	3.60555	160	4
5728	Gsb604	China	Semi-winter	170	0	157	165	3.60555	165	3.60555
5729	Gsb611	China	Semi-winter	174.5	0.707107	161	166	4	167	3.60555
5731	Gsb612	China	Semi-winter	N/A	N/A	161	168	3.60555	167	4
5732	Gsb615	China	Semi-winter	173	1.41421	161	163	3.60555	167	3.60555
5734	Gsb627	China	Semi-winter	172.5	0.707107	161	167	4	163	3.60555
5735	Gsb630	China	Semi-winter	172	0	157	167	3.60555	163	4
5736	Gsb641	China	Semi-winter	170	0	156	167	3.60555	160	3.60555
5741	940171	China	Semi-winter	168.5	0.707107	157	162	4	160	3.60555
5744	941608	China	Semi-winter	158.5	0.707107	149	161	3.60555	155	4
5750	95-139	China	Semi-winter	158.5	0.707107	153	162	3.60555	155	3.60555
5754	950246	China	Semi-winter	169.5	0.707107	159	160	4	160	3.60555
5755	950229	China	Semi-winter	156.5	0.707107	147	161	3.60555	155	4
5756	951061	China	Semi-winter	173	0	162	163	3.60555	155	3.60555
5764	Ab027	China	Semi-winter	165	0	153	163	4	155	3.60555
5779	96762	China	Winter	173	0	161	164	3.60555	165	4
5787	96786	China	Winter	173.5	2.12132	159	169	3.60555	167	3.60555
5788	961331	China	Winter	175.5	0.707107	NA	163	4	167	3.60555
5820	96539	China	Winter	174	0	161	166	3.60555	167	4
5842	96780	China	Winter	172.5	0.707107	159	165	3.60555	163	3.60555
5863	96628	China	Winter	173	0	162	167	4	160	3.60555
5867	97992	China	Winter	174	0	162	168	3.60555	165	4
5897	Huangzi4	China	Winter	173.5	0.707107	162	166	3.60555	165	3.60555
5898	Huangzi5	China	Winter	174.5	0.707107	161	165	4	167	3.60555
5900	Huangzi7	China	Winter	170.5	0.707107	158	164	3.60555	165	4
5901	Huangzi8	China	Winter	168.5	0.707107	158	165	3.60555	165	3.60555
5902	Huangzi9	China	Winter	176	0	163	163	4	167	3.60555
5908	4014	China	Semi-winter	153.5	7.77817	144	158	3.60555	155	4
5911	Shuangyou968	China	Semi-winter	157.5	0.707107	148	158	3.60555	155	3.60555
5913	97Xuan	China	Semi-winter	157.5	0.707107	149	158	4	155	3.60555
5914	Chuangyou96Ii45	China	Semi-winter	157	1.41421	148	162	3.60555	155	4
5915	Chuangyou960-91	China	Semi-winter	172	0	157	162	3.60555	160	3.60555
5916	I-Y-14youcai	China	Semi-winter	155.5	0.707107	147	155	4	155	3.60555
5924	Chuanyou96-98	China	Semi-winter	156.5	0.707107	142	160	3.60555	155	4
5939	E097076	China	Semi-winter	157	0	149	163	3.60555	155	3.60555
5940	Jianyang Youcai	China	Semi-winter	166	0	156	164	4	160	3.60555
5941	Y018	China	Semi-winter	168	0	154	164	3.60555	160	4
5947	Hea20	China	Semi-winter	160	1.41421	152	161	3.60555	155	3.60555
5949	90214-1	China	Semi-winter	157	2.82843	147	158	4	149	3.60555
5950	93345	China	Semi-winter	155	0	146	158	3.60555	149	4
5951	93355	China	Semi-winter	167.5	0.707107	159	156	3.60555	160	3.60555
5952	90147-8	China	Semi-winter	165.5	0.707107	156	158	4	160	3.60555
5954	90-5047	China	Semi-winter	159	2.82843	148	158	3.60555	155	4
5963	Chaungyou92-005	China	Semi-winter	165	0	145	161	3.60555	160	3.60555
5964	Chuangyouh-53	China	Semi-winter	126.5	0.707107	148	159	4	136	3.60555
5965	Chuangyou92-028	China	Semi-winter	175.5	0.707107	162	164	3.60555	167	4
5973	Mianhui1	China	Semi-winter	160	4.24264	154	157	3.60555	149	3.60555
5979	Mianza94-13	China	Semi-winter	157.5	0.707107	144	159	4	149	3.60555
5986	Chuangyou933059	China	Semi-winter	126.5	0.707107	148	157	3.60555	149	4
5987	Chuangyou92-054	China	Semi-winter	168	2.82843	148	158	3.60555	160	3.60555
5989	Heiyoucai	China	Semi-winter	160	1.41421	149	159	4	155	3.60555
5990	Chengkoushengli	China	Semi-winter	164.5	0.707107	152	157	3.60555	160	4
5993	Chuanyou92-057	China	Semi-winter	139	1.41421	144	157	3.60555	142	3.60555
6019	9918	China	Spring	140	0	140	167	4	142	3.60555
6038	Kao-48	China	Semi-winter	161	1.41421	146	158	3.60555	155	4
6043	Zhongshuang4	China	Semi-winter	168.5	0.707107	157	N/A	N/A	160	3.60555
6106	Cresor	France	Spring	174.5	0.707107	161	167	3.60555	129	3.60555
6115	Startigh	Sweden	Spring	125	0	139	160	4	136	4
6117	Bounty	Sweden	Spring	169.5	0.707107	157	N/A	N/A	160	3.60555
6118	Garrison	Sweden	Spring	N/A	N/A	NA	N/A	N/A	129	3.60555
6130	92-7-58	China	Semi-winter	169	1.41421	153	162	3.60555	160	4
6140	Hn-9464	South Korea	Semi-winter	159	1.41421	146	163	3.60555	155	3.60555
6141	Garrison	Sweden	Spring	159	0	157	163	4	155	3.60555
6143	Coronet	Sweden	Spring	161	1.41421	154	162	3.60555	155	4
6146	guue	Sweden	Spring	176.5	0.707107	NA	168	3.60555	159	3.60555
6150	Guuiver	Sweden	Winter	167	0	156	162	4	155	3.60555
6151	Chongma	Sweden	Spring	176	0	161	163	3.60555	157	4
6154	Iupiter	Sweden	Spring	172.5	0.707107	159	162	3.60555	160	3.60555
6155	Casion	Sweden	Winter	177	0	NA	171	4	167	3.60555
6156	Puma-Sv.8627102	Sweden	Winter	166	1.41421	149	163	3.60555	155	4
6177	6177	Japan	Winter	162	1.41421	151	161	3.60555	155	3.60555
6178	6178	Japan	Winter	170.5	0.707107	157	163	4	163	3.60555
6179	6179	Japan	Winter	174.5	0.707107	159	165	3.60555	165	4
6184	6184	Japan	Winter	165.5	0.707107	157	166	3.60555	160	3.60555
6185	6185	Japan	Winter	151	0	157	164	4	149	3.60555
6187	6187	Japan	Winter	161	0	142	161	3.60555	149	4
6188	6188	Japan	Winter	173.5	2.12132	161	164	3.60555	165	3.60555
6192	Wester	Canada	Spring	126.5	2.12132	142	158	4	155	3.60555
6197	Gcsunder	Germany	Winter	173	0	157	N/A	N/A	163	4
6198	Disamant	Germany	Winter	169	0	157	171	3.60555	163	3.60555
6206	Mar	Poland	Winter	176	0	162	N/A	N/A	167	3.60555
6209	7304	India	Winter	157.5	12.0208	157	169	3.60555	149	4
6216	34406	India	Winter	171	1.41421	161	166	4	165	3.60555
6219	Hanna	Sweden	Spring	170	1.41421	159	163	3.60555	167	3.60555
6220	Marnoo-2	Australia	Spring	164	2.82843	156	161	3.60555	163	4
6228	ReainaII	Sweden	Spring	160	1.41421	156	162	4	149	3.60555
6648	Zheyou17	China	Semi-winter	167.5	0.707107	151	N/A	N/A	155	3.6
6862	P6036-1	China	Semi-winter	169	1.41421	153	N/A	N/A	155	4
6871	P6036-2	China	Semi-winter	162.5	2.12132	142	N/A	N/A	155	3.60555
6872	699	China	Semi-winter	145.5	7.77817	147	N/A	N/A	155	3.60555
6873	P4099	China	Semi-winter	163	1.41421	149	N/A	N/A	155	4
6894	99-1055	China	Semi-winter	161	1.41421	151	N/A	N/A	155	3.60555
6932	Zhongshuang9	China	Semi-winter	162.5	0.707107	151	N/A	N/A	160	2.6
6940	Zheyou18	China	Semi-winter	171	1.41421	157	N/A	N/A	155	4
6941	You88	China	Semi-winter	171	1.41421	163	N/A	N/A	165	3.60555
6943	Huyou17	China	Semi-winter	163	2.82843	150	N/A	N/A	167	3.60555
6958	Yangjian8	China	Semi-winter	174.5	0.707107	159	N/A	N/A	167	4
6968	Zhongnongyou136	China	Semi-winter	167	1.41421	156	N/A	N/A	155	3.60555
6979	Huyou18	China	Semi-winter	165.5	2.12132	156	N/A	N/A	160	3.60555
6999	Xiwang106	China	Semi-winter	163.5	2.12132	151	N/A	N/A	160	4
7002	Zheyou5002	China	Semi-winter	156	1.41421	147	N/A	N/A	155	3.60555
7022	Hongyou3	China	Semi-winter	173	0	159	N/A	N/A	167	3.60555
7028	24729	China	Semi-winter	153.5	0.707107	152	N/A	N/A	155	4
7411	Su6106	China	Semi-winter	171	0	159	N/A	N/A	163	3.60555
7412	Suj209	China	Semi-winter	171.5	0.707107	159	N/A	N/A	163	3.60555
7413	Zheyou6001	China	Semi-winter	168	1.41421	150	N/A	N/A	155	4
7414	Shengguang77	China	Semi-winter	164	4.24264	149	N/A	N/A	155	3.60555
7415	68232	China	Semi-winter	127.5	3.53553	133	N/A	N/A	129	3.60555
7416	Huyou19	China	Semi-winter	172	0	159	N/A	N/A	165	4
7417	Yangguang2008	China	Semi-winter	163.5	4.94975	154	N/A	N/A	155	3.60555
7418	N5424	China	Semi-winter	162	2.82843	150	N/A	N/A	155	3.60555
7420	N6013	China	Semi-winter	171.5	2.12132	161	N/A	N/A	160	4
7421	Yan6015	China	Semi-winter	173.5	0.707107	161	N/A	N/A	167	3.60555
7423	G142	China	Semi-winter	158	0	153	N/A	N/A	155	3.60555
7424	Kt0601	China	Semi-winter	161.5	0.707107	156	N/A	N/A	155	4
7426	8M2280	China	Semi-winter	164.5	3.53553	151	N/A	N/A	155	3.60555
