# Supplementary material for: Association Mapping of Flowering Time QTLs and Insight into Their Contributions to Rapeseed Growth Habits
Source: Front Plant Sci. 2016 Mar 24;7:338. doi: 10.3389/fpls.2016.00338 (PMC4805649; doi:10.3389/fpls.2016.00338)
Supplement: Supplementary file 2 [file Table2.XLSX]

## Sheet: Sheet1
Table S2. Marker-trait association for rapeseed flowering time and their candidate genes
Chr.	Lead SNP	Peak position (bp)	Representive Sequence	-log10(P)	Max R2	Range(bp)		Enviorments	QTLs comparison a	Candidate genes	Alias
A01	Bn-A01-p5243181	4826450	GTCTAGTGTTCTTTTGGTGTTTCTTAGCATCCTTCGAGATTGAGATCTAG	4.47	0.0473	4273503	5434402	JX2007, JX2012		BnaA01g08940D,BnaA01g09530D,BnaA01g09760D,BnaA01g10590D	PHYE,CKA2,SVP,ELF6
A01	Bn-A01-p14201581	11787759	TCCTCCAATAGCAAGGATTGACAGTGCAAATTTCAGTTTCCAGATGTGCC	4.62	0.0489	9984823	11863045	JX2012, WH2013, YL2013		BnaA01g19000D,BnaA01g19030D,BnaA01g19850D,BnaA01g19880D	CKA2,FVE,ARP6,LUX
A01	Bn-A01-p16539250	14421549	TAGGGGTGAACCGTTTATAAGAAACGGGTACAAGACAAATTCGACCCAAA	4.92	0.0521	13863759	15685448	JX2012, WH2013, YL2013		BnaA01g21880D	CKA2
A01	Bn-A04-p2881354	17246177	CCGCCCCGCAGTTAACAATAACAAAAATCTCTACTTATACTATATGGCTA	4.91	0.0602	17194105	17676192	JX2007		BnaA01g25190D	CDF3
A02	Bn-A02-p9558338	6363641	TGTCCCAACCTTTTCTGTCACTCCTTTAGTATTGCTTTGGCTTCGTTGTT	4.96	0.0526	6192426	6363641	YL2013
A02	Bn-A02-p12061350	8776742	TGGATCATGTTTGAATGAATACTTGCCTACTGTGATGGTATGGAAGATGG	3.72	0.0456	8776742	9248051	JX2007, JX2012	Long et al., 2007; Shi et al., 2009; Wang et al., 2009; Schiessl et al., 2015	BnaA02g15390D,BnaA02g15400D,BnaA02g15710D,	AGL32,CKA2,CHE
A02	Bn-A02-p26421790	24150742	CAGATTCTTCAGGTGGTGTCATCAATCTTTTTCGAAGCTCACAACATATA	3.55	0.0433	24150742	24237453	JX2007, WH2013
A03	Bn-A03-p3319357	2877343	GCTGGAAATACAACGTGGATGAAAAAGTCTGACGAGAGTCTAAAACAGGT	4.61	0.0488	2419855	2877343	JX2012, YL2013		BnaA03g05350D,BnaA03g05650D,BnaA03g05700D	FLK,AGL18,CKA1
A03	Bn-A03-p7177504	6450507	ATTTCAACTACTCACACTAGCACCTTTAGCTCTAGCTTATACAGAATATG	4.55	0.0557	5046910	6515058	JX2007, WH2013	Long et al., 2007; Wang et al., 2010; Zou et al., 2012; Schiessl et al., 2015	BnaA03g12070D,BnaA03g12700D,BnaA03g12970D,BnaA03g12980D,BnaA03g13220D,BnaA03g13320D,BnaA03g13450D,BnaA03g13480D,BnaA03g13580D,BnaA03g13630D	TEM1,SPA4,AGL32,AGL18,EMF2,FRI,CIB1,CKA2,SPL,FLC
A03	Bn-A03-p14113489	13297841	CTTTTGTAATTTCTGTTGATAAGGATTTCTCGTTTAACCCTTGTAAAAGT	4.63	0.0486	13297841	13297841	WH2013, YL2013
A03	Bn-A03-p21862988	20653002	AAATGTAAATGCTGTACAGTTACGTGTTAAGTTGATATCAAGCTTTGTAA	4.21	0.0445	20581321	20653002	JX2012
A03	Bn-A03-p24842021	23322971	TTAACTAGCCTTTATATGTTAGAAATTTATCCATTCTTTCAGTTAACAGA	3.59	0.0438	23076850	23322971	JX2007		BnaA03g45650D	AGL24
A04	Bn-A04-p1971842	2008582	CTCTGCGCAAATACAATGCCTGCAGCCAAGCATGAAAAGAGGAGAAGATT	4.89	0.06	257040	4734286	JX2007, JX2012, WH2013,YL2013	Xu et al., 2016; Schiessl et al., 2015	BnaA04g00520D,BnaA04g00890D,BnaA04g01520D,BnaA04g01810D,BnaA04g02200D,BnaA04g02430D,BnaA04g02460D,BnaA04g02780D,BnaA04g03660D,BnaA04g04160D,BnaA04g04280D,BnaA04g04550D,	CDF3,AGL24,CKA2,AGL24,CIB1,AGL18,PIE1,AREB3,CDF2,AGL32,CKA2,ARP6
A04	Bn-A04-p6783717	8037978	CATTTATAATTCTTGCATCTCAAACGGTGAAGGAACAAACCACAGTAAGA	5.05	0.0581	7743947	10942653	JX2007, JX2012	Xu et al., 2016	BnaA04g09490D,BnaA04g10760D	CDF2,CHE
A04	Bn-A04-p11386737	12443640	GTAGATCCGTCCCTGGCTGCAAGTGTAACACGAGATAGGCGTCATCAGTC	4.45	0.047	11898475	13460703	JX2007, JX2012	Schiessl et al., 2015	BnaA04g14640D,BnaA04g14760D,BnaA04g15260D,BnaA04g15540D,BnaA04g15930D,BnaA04g16440D	AtCOL3,PRR9,ELF3,PAF2,TSF,CDF3
A05	Bn-A05-p1676024	1823570	ATACAAGTTTCATTATCTTGCTCAAAAGTTATTTCCATAATCTTCTGGAT	3.41	0.0433	1823570	2357967	JX2007		BnaA05g03310D,BnaA05g03550D,BnaA05g03780D,	FPA,CKA2,EFS
A06	Bn-A06-p49287	42625	TTGCTAACCATGTGGTCATGGTTCTTTGGAAAGGGAGGTTGTGTTACAGA	4.62	0.0493	42625	73593	JX2012, YL2013
A06	Bn-A06-p7432516	6938228	AGCTGATACTGATAGACAAATGATCATGACGAACTGAGTTGAATGTTGGC	3.42	0.036	5537013	6938228	JX2012		BnaA06g10760D,BnaA06g11730D,BnaA06g12320D,BnaA06g12330D,BnaA06g12520D,BnaA06g12770D	AP2,ELF4,TSF,CKA2,CIB1,FKF1
A06	Bn-A06-p10086667	9507458	TTCCATTCGGACACAAGACAAGAGACTAGACAATGCTTTTCAAGACTGGC	3.77	0.049	9087452	9507458	JX2007		BnaA06g16420D,BnaA06g16550D	HAP5C,REF6
A07	Bn-A07-p4129734	6044969	TAGATTTGCATTGCAAACAAGATCTGAATAAAATACATGCAAACACACAA	3.56	0.0375	6044969	6059466	JX2012
A07	Bn-A07-p9512256	10867680	TTCAGAGATTGTAAGGCGGCGTGGAGCATCAGATATCCCACACCTAAATT	3.55	0.0373	10430963	10867680	JX2012		BnaA07g11180D	CKA2
A07	Bn-A07-p16574221	18554138	ATATATTTAGTAACAAAATTATGGTACAGTTTGGAAAAAATAAATGCAAT	5.59	0.0691	14463578	18554138	JX2007, JX2012, WH2013, YL2013	Xu et al., 2016	BnaA07g17280D,BnaA07g17500D,BnaA07g17550D,BnaA07g17770D,BnaA07g18050D,BnaA07g18130D,BnaA07g18500D,BnaA07g18530D,BnaA07g18580D,BnaA07g18960D,BnaA07g19120D,BnaA07g19540D,BnaA07g20430D,BnaA07g20620D,BnaA07g22580D,BnaA07g23470D,BnaA07g24230D,BnaA07g24360D	AGL18,CIB1,SPL,HAP5B,AGL24,FLD,FY,CKA2,EFS,CKA2,TEM2,HUA2,PAF1,GRF2,CKA2,CKA2,CDF3,AGL18
A09	Bn-A09-p13969906	9771847	ACCATTTAGATACCAAAATAAGACACATATTTTTATAATTTCAATGGCTA	3.78	0.0462	9757078	10068828	JX2007
A09	Bn-A09-p35483201	32626018	TCCACTATTGTATTGGGCTTTTTTGCCTTGTCTTTTATTTGGGCCTTCTC	4.52	0.0559	32626018	32729557	JX2007
A10	Bn-A10-p4114477	751582	GTGGTCTTTATAGTCAGTTGTCGCAATAAGCTCCTCTTGTATAGGAGTAG	4.2	0.0444	751582	751611	JX2012
A10	Bn-A10-p8237821	9835903	TGCAGGGTCCATACGACAACATAATCAACCTCAGCAGTCCCATGTATGAT	3.62	0.0441	9835903	10695100	JX2007,JX2012	Long et al., 2007	BnaA10g12390D,BnaA10g12930D,BnaA10g12950D,BnaA10g13030D	ARP6,PRR3,TOE2,CDF3
A10	Bn-A10-p14914898	14852902	AACTTTCCTGTAAACATCTTCTTTCTCTTCTTCTGGTTTATTCGGTTAAT	6.13	0.0787	13375104	15191366	JX2007, JX2012, WH2013, YL2013	Hou et al., 2012; Long et al., 2007; Zou et al., 2012; Xu et al., 2016	BnaA10g18480D,BnaA10g18850D,BnaA10g21750D,BnaA10g21980D,BnaA10g22080D,BnaA10g22340D	SVP,FLK,AP2,CKA2,FLC,ARP6
C02	Bn-scaff_16804_1-p254827	7048276	ATCAAGTAAAACGAAAACAAAACTAGCTAGAGCTATGAAAGATCCAAGTG	6.5	0.0877	6956919	13653054	JX2007, JX2012, WH2013, YL2013	Long et al., 2007	BnaC02g14000D,BnaC02g15480D,BnaC02g15870D	SPL,CHE,EMF2
C02	Bn-scaff_18675_1-p264026	22287455	AAATACACTTGAAGAAAAAAAAAATGTTACCACCAAAATGCAAAGGTTTT	5.16	0.0549	22287455	22560553	JX2012	Long et al., 2007	BnaC02g24950D	GRF2
C02	Bn-scaff_22144_1-p223560	39806927	TTAATTACATAAATGACTTTCATGTCAAGCATTAGAGTCTAATTGATAAG	4.41	0.0554	39806927	39807769	JX2007
C03	Bn-scaff_22067_1-p142137	20727938	ACAAAATCGAGTAGAATGCTCTGCTGCTTCTTTCGTGTCATCAGGTCTTT	5.27	0.0653	17612972	20733429	JX2007, JX2012		BnaC03g31040D,BnaC03g31910D,BnaC03g31970D,BnaC03g32670D,BnaC03g32910D,BnaC03g32980D,BnaC03g33790D	AP2,CKA2,CKA2,CKA1,AtCOL2,GRF7,FLK
C03	Bn-scaff_16925_1-p102185	26469784	GTGAAGTTGATGAAGATGGAGGAAAGGTGAGGAATAGTTTATTTTCTTCT	4.1	0.0517	26469784	26484169	JX2007
C03	Bn-scaff_19047_1-p373511	58296560	TTTACACCAAAAAAGAAAACTCATTAGACACAATAAGACTAAGGACTTGT	4.24	0.0449	58161161	58296560	YL2013	Xu et al., 2016
C04	Bn-A04-p3363190	27699177	CTTCCATACCATTCCACACGGTCCAGTGTTTTCTCGATGTGAAACTCTAC	3.53	0.0371	27699177	27699177	JX2012, WH2013
C04	Bn-Scaffold000217-p70914	40003810	TCCTCAGTTCAGTTCTATTCCACCATGCTCAAATCATAAGTTAGGCCCGT	3.61	0.0445	40003810	41181656	JX2007	Long et al., 2007	BnaC04g39220D,BnaC04g39790D,BnaC04g40070D	TSF,CDF3,CDF1
C05	Bn-scaff_18181_1-p1664330	6126098	CCACCAAGAGGTAATAATACAATTTCTTTAAAAAGTATTTCTTACAAACT	4.97	0.061	6126098	6206615	JX2007
C06	Bn-scaff_17799_1-p853567	35737902	TGTGTGTTGAGAGGGTGATGTTCTGGGGGTGTTGTACGAATAACTAATCA	4.3	0.057	35425630	35737902	JX2007		BnaC06g37430D,BnaC06g37540D	SPL,EFS
C07	Bn-scaff_16130_1-p109138	27917591	ACTTCAACCTTATGAGAAGGGCGCTAAATGATGAGGATATAAAGAAGATA	3.68	0.0449	27916672	27924141	JX2007
C08	Bn-scaff_16197_1-p1160568	32935167	GTAATAAGGCTGTAAAACACACACATTCCATGAGATGTTTTGTAAGAAGG	4.1	0.0433	32935167	33635989	JX2012		BnaC08g34920D	SVP
C09	Bn-scaff_23903_1-p21341	39457063	CGGATACGATATTTTACTATTCGGATTTAAATTTGAACGTTTCAGATAAC	4.72	0.0579	39312343	43429210	JX2007, JX2012	Schiessl et al., 2015	BnaC09g37550D,BnaC09g38250D,BnaC09g38840D,BnaC09g39030D,BnaC09g39190D,BnaC09g40240D,BnaC09g40510D	AGL32,CKA2,CKA2,SPL,PIE1,LHP1,AP2
Note: Some comparisons were peformed by peronal communication as their data were not released.
a In this column we compared flowering time QTLs with studies performed on TN DH mapping population, studies performed by Schiessl et al (2015) and studies performed by Xu et al (2016). If the QTL overlaps with others, the references are listed. Novel means this QTL is new.
