# Supplementary material for: Association Mapping of Flowering Time QTLs and Insight into Their Contributions to Rapeseed Growth Habits
Source: Front Plant Sci. 2016 Mar 24;7:338. doi: 10.3389/fpls.2016.00338 (PMC4805649; doi:10.3389/fpls.2016.00338)
Supplement: Supplementary file 3 [file Table3.XLSX]

## Sheet: Sheet1
Table S3. Flowering time genes in B. napus and their orthologs in A. thaliana
B. napus Fti Genes	B. napus Alias	Chr.	Start	End	Arabidopsis Fti genes	A. thaliana Alias
BnaA01g00130D	GSBRNA2T00121626001	chrA01	40416	41144	AT1G69570.1	CDF3
BnaA01g00160D	GSBRNA2T00121622001	chrA01	58061	61046	AT2G22540.1	SVP
BnaA01g00290D	GSBRNA2T00121601001	chrA01	147063	149809	AT4G36920.1	AP2
BnaA01g01640D	GSBRNA2T00121438001	chrA01	868633	869717	AT4G35900.1	FD
BnaA01g02620D	GSBRNA2T00121331001	chrA01	1306916	1308748	AT4G34530.1	CIB1
BnaA01g02900D	GSBRNA2T00121299001	chrA01	1419050	1422183	AT4G24540.1	AGL24
BnaA01g04940D	GSBRNA2T00121056001	chrA01	2286444	2293481	AT3G12810.1	PIE1
BnaA01g04960D	GSBRNA2T00121054001	chrA01	2299553	2304895	AT3G12810.1	PIE1
BnaA01g06810D	GSBRNA2T00039881001	chrA01	3165531	3169058	AT4G30200.2	VEL1
BnaA01g07210D	GSBRNA2T00076807001	chrA01	3396617	3399733	AT2G19520.1	FVE
BnaA01g08940D	GSBRNA2T00131299001	chrA01	4339719	4343137	AT4G18130.1	PHYE
BnaA01g09530D	GSBRNA2T00131365001	chrA01	4679184	4681995	AT2G23080.1	CKA2
BnaA01g09760D	GSBRNA2T00131396001	chrA01	4799395	4803636	AT2G22540.1	SVP
BnaA01g10590D	GSBRNA2T00131512001	chrA01	5290593	5295855	AT5G04240.1	ELF6
BnaA01g12690D	GSBRNA2T00072695001	chrA01	6340715	6344636	AT2G23080.1	CKA2
BnaA01g12710D	GSBRNA2T00072693001	chrA01	6346539	6347946	AT3G57390.1	AGL18
BnaA01g13920D	GSBRNA2T00056321001	chrA01	7065545	7071799	AT4G24540.1	AGL24
BnaA01g15170D	GSBRNA2T00149607001	chrA01	7731761	7733896	AT3G04610.1	FLK
BnaA01g17510D	GSBRNA2T00051672001	chrA01	9237088	9244136	AT4G16280.1	FCA
BnaA01g17750D	GSBRNA2T00051639001	chrA01	9409548	9411653	AT3G46640.1	LUX
BnaA01g18110D	GSBRNA2T00075715001	chrA01	9596841	9599776	AT4G16845.1	VRN2
BnaA01g19000D	GSBRNA2T00043621001	chrA01	10467887	10470169	AT3G50000.1	CKA2
BnaA01g19030D	GSBRNA2T00043618001	chrA01	10508954	10511272	AT2G19520.1	FVE
BnaA01g19850D	GSBRNA2T00138420001	chrA01	11464958	11467265	AT3G33520.1	ARP6
BnaA01g19880D	GSBRNA2T00138427001	chrA01	11570349	11572195	AT3G46640.1	LUX
BnaA01g20470D	GSBRNA2T00138535001	chrA01	12384520	12386699	AT2G23080.1	CKA2
BnaA01g21040D	GSBRNA2T00138613001	chrA01	12943079	12945493	AT3G50000.1	CKA2
BnaA01g21270D	GSBRNA2T00138646001	chrA01	13137416	13139392	AT5G39660.1	CDF2
BnaA01g21880D	GSBRNA2T00080355001	chrA01	14168921	14170862	AT2G23080.1	CKA2
BnaA01g23600D	GSBRNA2T00002593001	chrA01	15935460	15936632	AT4G34530.1	CIB1
BnaA01g23620D	GSBRNA2T00002595001	chrA01	15944455	15953827	AT5G67380.1	CKA1
BnaA01g25190D	GSBRNA2T00063821001	chrA01	17636846	17637448	AT3G47500.1	CDF3
BnaA01g26200D	GSBRNA2T00005626001	chrA01	18271993	18274689	AT3G19290.1	ABF4
BnaA01g26330D	GSBRNA2T00005597001	chrA01	18402296	18405354	AT3G18990.1	VRN1
BnaA01g26500D	GSBRNA2T00005574001	chrA01	18562459	18564943	AT3G33520.1	ARP6
BnaA01g27690D	GSBRNA2T00057550001	chrA01	19325277	19328794	AT5G13480.1	FY
BnaA01g28350D	GSBRNA2T00010034001	chrA01	19803940	19804416	AT5G47640.1	HAP3B
BnaA01g28630D	GSBRNA2T00010003001	chrA01	19901980	19904943	AT1G04400.2	CRY2
BnaA01g28740D	GSBRNA2T00009986001	chrA01	19961529	19962465	AT2G33810.1	SPL
BnaA01g28800D	GSBRNA2T00009978001	chrA01	20005579	20009409	AT3G15354.1	SPA3
BnaA01g29230D	GSBRNA2T00009927001	chrA01	20210041	20213178	AT3G50000.1	CKA2
BnaA01g31450D	GSBRNA2T00060239001	chrA01	21381880	21383537	AT3G46640.1	LUX
BnaA01g33070D	GSBRNA2T00057239001	chrA01	22377201	22379701	AT2G22540.1	SVP
BnaA01g33270D	GSBRNA2T00057215001	chrA01	22565105	22567710	AT5G67380.1	CKA1
BnaA01g34730D	GSBRNA2T00013852001	chrA01_random	91516	92811	AT4G36920.1	AP2
BnaA01g35210D	GSBRNA2T00017223001	chrA01_random	472750	477289	AT3G57390.1	AGL18
BnaA01g35940D	GSBRNA2T00005185001	chrA01_random	1429664	1436519	AT5G13480.1	FY
BnaA01g36010D	GSBRNA2T00020083001	chrA01_random	1491139	1496604	AT3G12810.1	PIE1
BnaA01g36720D	GSBRNA2T00022850001	chrA01_random	2256192	2258843	AT4G36920.1	AP2
BnaA01g37140D	GSBRNA2T00004092001	chrA01_random	2505700	2508190	AT3G10390.1	FLD
BnaA02g00190D	GSBRNA2T00143554001	chrA02	74371	76707	AT3G33520.1	ARP6
BnaA02g00370D	GSBRNA2T00143535001	chrA02	134362	138212	AT5G10140.1	FLC
BnaA02g00540D	GSBRNA2T00143515001	chrA02	198137	199618	AT5G10450.1	GRF6
BnaA02g00560D	GSBRNA2T00143511001	chrA02	214038	217822	AT4G36920.1	AP2
BnaA02g01670D	GSBRNA2T00143378001	chrA02	773694	778116	AT5G13480.1	FY
BnaA02g02840D	GSBRNA2T00143240001	chrA02	1277030	1277983	AT5G15850.1	AtCOL1
BnaA02g03590D	GSBRNA2T00143151001	chrA02	1585643	1588695	AT4G36920.1	AP2
BnaA02g04770D	GSBRNA2T00081381001	chrA02	2115583	2118134	AT5G23260.1	AGL32
BnaA02g06470D	GSBRNA2T00001472001	chrA02	3093247	3094545	AT5G39660.1	CDF2
BnaA02g06490D	GSBRNA2T00001475001	chrA02	3106312	3108592	AT5G60120.1	TOE2
BnaA02g06500D	GSBRNA2T00001476001	chrA02	3112537	3113268	AT5G60100.1	PRR3
BnaA02g07080D	GSBRNA2T00010703001	chrA02	3356025	3358401	AT3G33520.1	ARP6
BnaA02g07770D	GSBRNA2T00052765001	chrA02	3685290	3687670	AT5G58230.1	MSI1
BnaA02g07840D	GSBRNA2T00052772001	chrA02	3718203	3723332	AT1G68050.1	FKF1
BnaA02g08130D	GSBRNA2T00088556001	chrA02	3851339	3854687	AT4G36920.1	AP2
BnaA02g08140D	GSBRNA2T00088555001	chrA02	3862183	3864694	AT5G57380.1	VIN3
BnaA02g11190D	GSBRNA2T00036925001	chrA02	5827250	5828089	AT5G08330.1	CHE
BnaA02g11340D	GSBRNA2T00090852001	chrA02	5948180	5953241	AT5G51230.1	EMF2
BnaA02g12130D	GSBRNA2T00090951001	chrA02	6375936	6379058	AT1G65480.1	FT
BnaA02g12280D	GSBRNA2T00090976001	chrA02	6491936	6495157	AT3G10390.1	FLD
BnaA02g14040D	GSBRNA2T00082795001	chrA02	7870105	7871157	AT1G68840.1	TEM2
BnaA02g14180D	GSBRNA2T00082777001	chrA02	7973226	7975757	AT4G34530.1	CIB1
BnaA02g14580D	GSBRNA2T00096385001	chrA02	8273118	8274696	AT2G33810.1	SPL
BnaA02g15390D	GSBRNA2T00116497001	chrA02	8904503	8909003	AT5G23260.1	AGL32
BnaA02g15400D	GSBRNA2T00116494001	chrA02	8917385	8920266	AT2G23080.1	CKA2
BnaA02g15710D	GSBRNA2T00116452001	chrA02	9180620	9181972	AT5G08330.1	CHE
BnaA02g16050D	GSBRNA2T00093932001	chrA02	9515655	9519320	AT4G36920.1	AP2
BnaA02g16060D	GSBRNA2T00093934001	chrA02	9535875	9536234	AT1G72630.1	ELF4
BnaA02g16580D	GSBRNA2T00088013001	chrA02	9887385	9888673	AT4G34530.1	CIB1
BnaA02g16710D	GSBRNA2T00092370001	chrA02	9979950	9982940	AT2G18915.2	LKP2
BnaA02g19190D	GSBRNA2T00036591001	chrA02	11909896	11912373	AT5G42790.1	PAF1
BnaA02g20420D	GSBRNA2T00104268001	chrA02	12723148	12724691	AT1G13260.1	RAV1
BnaA02g20680D	GSBRNA2T00104316001	chrA02	13027816	13032584	AT4G02560.1	LD
BnaA02g20780D	GSBRNA2T00104329001	chrA02	13096024	13097092	AT5G13480.1	FY
BnaA02g22580D	GSBRNA2T00084836001	chrA02	15114736	15117571	AT2G23070.1	CKA2
BnaA02g23310D	GSBRNA2T00114023001	chrA02	16416032	16417640	AT5G42790.1	PAF1
BnaA02g24780D	GSBRNA2T00063420001	chrA02	18097345	18101884	AT3G48430.1	REF6
BnaA02g25600D	GSBRNA2T00041612001	chrA02	18785085	18785860	AT5G47640.1	HAP3B
BnaA02g25910D	GSBRNA2T00030911001	chrA02	18971051	18973214	AT3G46640.1	LUX
BnaA02g26910D	GSBRNA2T00069571001	chrA02	19843545	19846468	AT2G23070.1	CKA2
BnaA02g27630D	GSBRNA2T00072242001	chrA02	20406412	20407386	AT3G25730.1	RAV1-like
BnaA02g29460D	GSBRNA2T00086985001	chrA02	21524825	21526087	AT1G13260.1	RAV1
BnaA02g30270D	GSBRNA2T00098107001	chrA02	21934213	21936672	AT4G34530.1	CIB1
BnaA02g31060D	GSBRNA2T00120539001	chrA02	22427684	22430174	AT5G27220.1	FRI
BnaA02g32180D	GSBRNA2T00120392001	chrA02	23154474	23159255	AT5G13480.1	FY
BnaA02g32550D	GSBRNA2T00120342001	chrA02	23411190	23413376	AT5G24470.1	PRR5
BnaA02g32950D	GSBRNA2T00086429001	chrA02	23618206	23619457	AT5G08330.1	CHE
BnaA02g33000D	GSBRNA2T00086423001	chrA02	23647303	23649432	AT5G23150.1	HUA2
BnaA02g33010D	GSBRNA2T00086422001	chrA02	23649506	23653992	AT5G23150.1	HUA2
BnaA02g33230D	GSBRNA2T00046036001	chrA02	23787373	23790223	AT3G57390.1	AGL18
BnaA02g34480D	GSBRNA2T00047458001	chrA02	24567877	24570742	AT2G23080.1	CKA2
BnaA02g34510D	GSBRNA2T00047455001	chrA02	24582145	24586321	AT5G65060.1	MAF3
BnaA02g34520D	GSBRNA2T00047454001	chrA02	24588117	24592498	AT5G65070.1	MAF4
BnaA02g34550D	GSBRNA2T00047451001	chrA02	24597395	24607407	AT5G65070.1	MAF4
BnaA02g35200D	GSBRNA2T00025194001	chrA02_random	138670	140227	AT5G57660.1	ATCOL5
BnaA02g35830D	GSBRNA2T00048277001	chrA02_random	545403	549296	AT3G57390.1	AGL18
BnaA03g02470D	GSBRNA2T00129692001	chrA03	1123271	1124470	AT5G08330.1	CHE
BnaA03g02820D	GSBRNA2T00129741001	chrA03	1360971	1364359	AT5G10140.1	FLC
BnaA03g02930D	GSBRNA2T00129754001	chrA03	1413174	1415010	AT5G10450.1	GRF6
BnaA03g02990D	GSBRNA2T00129763001	chrA03	1446503	1449852	AT4G36920.1	AP2
BnaA03g04360D	GSBRNA2T00129926001	chrA03	2036980	2041705	AT5G13480.1	FY
BnaA03g04490D	GSBRNA2T00129941001	chrA03	2102140	2104040	AT3G57390.1	AGL18
BnaA03g04990D	GSBRNA2T00129998001	chrA03	2302058	2304909	AT2G23080.1	CKA2
BnaA03g05350D	GSBRNA2T00130037001	chrA03	2458136	2461677	AT3G04610.1	FLK
BnaA03g05650D	GSBRNA2T00130071001	chrA03	2562111	2564783	AT3G57390.1	AGL18
BnaA03g05700D	GSBRNA2T00130079001	chrA03	2593137	2597701	AT5G67380.1	CKA1
BnaA03g06690D	GSBRNA2T00130195001	chrA03	2993685	2995519	AT5G17690.1	LHP1
BnaA03g08030D	GSBRNA2T00148924001	chrA03	3559362	3561725	AT5G23260.1	AGL32
BnaA03g08650D	GSBRNA2T00148844001	chrA03	3919872	3924999	AT3G12810.1	PIE1
BnaA03g09070D	GSBRNA2T00148796001	chrA03	4088185	4090692	AT1G69570.1	CDF3
BnaA03g09510D	GSBRNA2T00148746001	chrA03	4263995	4265728	AT3G33520.1	ARP6
BnaA03g09860D	GSBRNA2T00148706001	chrA03	4449864	4453118	AT5G58230.1	MSI1
BnaA03g09900D	GSBRNA2T00148702001	chrA03	4464809	4469788	AT1G68050.1	FKF1
BnaA03g10310D	GSBRNA2T00148653001	chrA03	4638582	4640975	AT5G57380.1	VIN3
BnaA03g12070D	GSBRNA2T00075893001	chrA03	5461429	5461950	AT1G25560.1	TEM1
BnaA03g12700D	GSBRNA2T00066758001	chrA03	5790952	5792010	AT1G53090.1	SPA4
BnaA03g12970D	GSBRNA2T00066728001	chrA03	5891139	5893972	AT5G23260.1	AGL32
BnaA03g12980D	GSBRNA2T00066725001	chrA03	5903258	5905849	AT3G57390.1	AGL18
BnaA03g13220D	GSBRNA2T00066698001	chrA03	5998751	6007985	AT5G51230.1	EMF2
BnaA03g13320D	GSBRNA2T00066686001	chrA03	6053113	6055294	AT4G00650.1	FRI
BnaA03g13450D	GSBRNA2T00142208001	chrA03	6103810	6105825	AT4G34530.1	CIB1
BnaA03g13480D	GSBRNA2T00142205001	chrA03	6139503	6142537	AT2G23070.1	CKA2
BnaA03g13580D	GSBRNA2T00142194001	chrA03	6199960	6201708	AT2G33810.1	SPL
BnaA03g13630D	GSBRNA2T00142187001	chrA03	6240056	6245305	AT5G10140.1	FLC
BnaA03g16960D	GSBRNA2T00086075001	chrA03	7957582	7959701	AT2G37060.1	HAP3B
BnaA03g17300D	GSBRNA2T00124914001	chrA03	8111697	8112882	AT5G39660.1	CDF2
BnaA03g17320D	GSBRNA2T00124911001	chrA03	8124908	8127152	AT3G33520.1	ARP6
BnaA03g17950D	GSBRNA2T00124833001	chrA03	8457681	8459078	AT2G23070.1	CKA2
BnaA03g18200D	GSBRNA2T00124805001	chrA03	8535232	8536613	AT2G38880.1	HAP3A
BnaA03g18260D	GSBRNA2T00124799001	chrA03	8556127	8559385	AT5G04240.1	ELF6
BnaA03g18330D	GSBRNA2T00124792001	chrA03	8595278	8611337	AT3G12810.1	PIE1
BnaA03g18840D	GSBRNA2T00124729001	chrA03	8892178	8892797	AT2G40080.1	ELF4
BnaA03g19910D	GSBRNA2T00139111001	chrA03	9465732	9469924	AT2G23080.1	CKA2
BnaA03g19980D	GSBRNA2T00139102001	chrA03	9509949	9512473	AT3G10390.1	FLD
BnaA03g20470D	GSBRNA2T00139037001	chrA03	9731222	9734365	AT3G50000.1	CKA2
BnaA03g20680D	GSBRNA2T00139015001	chrA03	9804836	9807462	AT1G77300.1	EFS
BnaA03g21230D	GSBRNA2T00138949001	chrA03	10088383	10096702	AT3G12810.1	PIE1
BnaA03g21350D	GSBRNA2T00138936001	chrA03	10136110	10139715	AT2G46340.1	SPA1
BnaA03g21490D	GSBRNA2T00138920001	chrA03	10189483	10191433	AT1G69570.1	CDF3
BnaA03g21550D	GSBRNA2T00138914001	chrA03	10216272	10217198	AT1G68840.1	TEM2
BnaA03g21860D	GSBRNA2T00138879001	chrA03	10344600	10345070	AT5G47640.1	HAP3B
BnaA03g21910D	GSBRNA2T00138873001	chrA03	10373918	10374334	AT2G29950.1	ELF4
BnaA03g22100D	GSBRNA2T00138851001	chrA03	10471932	10474564	AT2G28550.1	TOE1
BnaA03g22340D	GSBRNA2T00138823001	chrA03	10610861	10612772	AT2G27550.1	TSF
BnaA03g24210D	GSBRNA2T00151432001	chrA03	11642402	11646268	AT4G24540.1	AGL24
BnaA03g26950D	GSBRNA2T00112156001	chrA03	13302192	13304522	AT2G23080.1	CKA2
BnaA03g27010D	GSBRNA2T00112149001	chrA03	13334908	13338162	AT2G23080.1	CKA2
BnaA03g27650D	GSBRNA2T00112072001	chrA03	13589758	13592422	AT5G67380.1	CKA1
BnaA03g27860D	GSBRNA2T00112045001	chrA03	13671525	13672402	AT3G02380.1	AtCOL2
BnaA03g27950D	GSBRNA2T00112035001	chrA03	13697209	13699056	AT3G02520.1	GRF7
BnaA03g28670D	GSBRNA2T00111942001	chrA03	13978150	13982039	AT3G04610.1	FLK
BnaA03g29180D	GSBRNA2T00111887001	chrA03	14201057	14204149	AT2G23080.1	CKA2
BnaA03g31180D	GSBRNA2T00111657001	chrA03	15077801	15080937	AT3G10390.1	FLD
BnaA03g31400D	GSBRNA2T00111627001	chrA03	15166082	15166489	AT3G46640.1	LUX
BnaA03g31790D	GSBRNA2T00111579001	chrA03	15340640	15342109	AT1G13260.1	RAV1
BnaA03g33970D	GSBRNA2T00137554001	chrA03	16504578	16505412	AT5G47640.1	HAP3B
BnaA03g34320D	GSBRNA2T00137511001	chrA03	16726840	16729980	AT2G46790.1	PRR9
BnaA03g34390D	GSBRNA2T00137504001	chrA03	16746371	16747204	AT2G18790.1	PHYB
BnaA03g34950D	GSBRNA2T00137443001	chrA03	17050661	17053064	AT3G33520.1	ARP6
BnaA03g35020D	GSBRNA2T00137434001	chrA03	17099334	17101764	AT3G18990.1	VRN1
BnaA03g35190D	GSBRNA2T00137411001	chrA03	17201034	17203488	AT3G19290.1	ABF4
BnaA03g35550D	GSBRNA2T00137368001	chrA03	17355298	17359950	AT3G12810.1	PIE1
BnaA03g36050D	GSBRNA2T00137309001	chrA03	17622455	17623919	AT1G68050.1	FKF1
BnaA03g36180D	GSBRNA2T00091939001	chrA03	17687296	17688294	AT3G47500.1	CDF3
BnaA03g36210D	GSBRNA2T00091949001	chrA03	17700381	17702480	AT3G21320.1	ELF3
BnaA03g38250D	GSBRNA2T00155014001	chrA03	19006756	19008682	AT1G47250.1	PAF2
BnaA03g38390D	GSBRNA2T00155032001	chrA03	19081916	19082545	AT5G47640.1	HAP3B
BnaA03g39500D	GSBRNA2T00113632001	chrA03	19707065	19709464	AT5G23260.1	AGL32
BnaA03g39560D	GSBRNA2T00113626001	chrA03	19725604	19733296	AT5G23150.1	HUA2
BnaA03g39760D	GSBRNA2T00113602001	chrA03	19842066	19844255	AT5G39660.1	CDF2
BnaA03g39820D	GSBRNA2T00113594001	chrA03	19891183	19894092	AT3G57390.1	AGL18
BnaA03g40160D	GSBRNA2T00113551001	chrA03	20054770	20057312	AT5G61380.1	TOC1
BnaA03g40220D	GSBRNA2T00113543001	chrA03	20099937	20103137	AT5G23260.1	AGL32
BnaA03g40810D	GSBRNA2T00113462001	chrA03	20416980	20417708	AT3G47500.1	CDF3
BnaA03g41260D	GSBRNA2T00151309001	chrA03	20670984	20672615	AT1G47250.1	PAF2
BnaA03g41790D	GSBRNA2T00151241001	chrA03	20968857	20969582	AT1G69570.1	CDF3
BnaA03g42250D	GSBRNA2T00151190001	chrA03	21204806	21208404	AT5G13480.1	FY
BnaA03g42350D	GSBRNA2T00151176001	chrA03	21268993	21272134	AT3G46640.1	LUX
BnaA03g43820D	GSBRNA2T00106627001	chrA03	22077088	22081741	AT2G22540.1	SVP
BnaA03g43900D	GSBRNA2T00106638001	chrA03	22112170	22115004	AT3G50000.1	CKA2
BnaA03g45650D	GSBRNA2T00106863001	chrA03	23232896	23237783	AT4G24540.1	AGL24
BnaA03g46780D	GSBRNA2T00048970001	chrA03	23990545	23993883	AT4G24540.1	AGL24
BnaA03g47430D	GSBRNA2T00093623001	chrA03	24318174	24318359	AT3G57390.1	AGL18
BnaA03g47710D	GSBRNA2T00075319001	chrA03	24506570	24508991	AT3G04610.1	FLK
BnaA03g48900D	GSBRNA2T00044315001	chrA03	25126743	25131753	AT2G23380.1	CLF
BnaA03g49640D	GSBRNA2T00044812001	chrA03	25624405	25625952	AT3G10390.1	FLD
BnaA03g51000D	GSBRNA2T00092702001	chrA03	26461800	26465274	AT4G24540.1	AGL24
BnaA03g51330D	GSBRNA2T00077693001	chrA03	26647405	26648079	AT5G16260.1	ELF9
BnaA03g51340D	GSBRNA2T00077695001	chrA03	26656828	26657448	AT5G16260.1	ELF9
BnaA03g51810D	GSBRNA2T00077761001	chrA03	26961566	26966016	AT3G12810.1	PIE1
BnaA03g51830D	GSBRNA2T00077765001	chrA03	26983638	26986360	AT2G46790.1	PRR9
BnaA03g52450D	GSBRNA2T00083285001	chrA03	27386114	27390264	AT3G18990.1	VRN1
BnaA03g53460D	GSBRNA2T00075217001	chrA03	28047517	28048767	AT4G34530.1	CIB1
BnaA03g53830D	GSBRNA2T00043244001	chrA03	28390679	28393341	AT4G36920.1	AP2
BnaA03g54830D	GSBRNA2T00017018001	chrA03_random	18361	20173	AT1G26790.1	CDF3
BnaA03g55120D	GSBRNA2T00004958001	chrA03_random	168132	168884	AT3G46640.1	LUX
BnaA03g55700D	GSBRNA2T00028358001	chrA03_random	384706	389887	AT5G13480.1	FY
BnaA03g55890D	GSBRNA2T00019724001	chrA03_random	461551	463842	AT3G33520.1	ARP6
BnaA03g56710D	GSBRNA2T00030713001	chrA03_random	832534	834563	AT4G09000.1	GRF1
BnaA03g56870D	GSBRNA2T00011645001	chrA03_random	898680	900519	AT3G57390.1	AGL18
BnaA03g56880D	GSBRNA2T00011646001	chrA03_random	901877	905188	AT4G24540.1	AGL24
BnaA03g56900D	GSBRNA2T00011648001	chrA03_random	919093	920028	AT5G08330.1	CHE
BnaA03g58570D	GSBRNA2T00023653001	chrA03_random	1739585	1740196	AT1G69570.1	CDF3
BnaA03g58630D	GSBRNA2T00072730001	chrA03_random	1791728	1792886	AT5G58230.1	MSI1
BnaA03g58950D	GSBRNA2T00004051001	chrA03_random	2014993	2019429	AT3G12810.1	PIE1
BnaA03g60050D	GSBRNA2T00035047001	chrA03_random	4433920	4438110	AT3G12810.1	PIE1
BnaA04g00160D	GSBRNA2T00149326001	chrA04	78711	86084	AT5G23150.1	HUA2
BnaA04g00520D	GSBRNA2T00149279001	chrA04	398546	406234	AT1G69570.1	CDF3
BnaA04g00890D	GSBRNA2T00149230001	chrA04	615978	618162	AT4G24540.1	AGL24
BnaA04g01520D	GSBRNA2T00149153001	chrA04	970340	972279	AT2G23080.1	CKA2
BnaA04g01810D	GSBRNA2T00149118001	chrA04	1161261	1165954	AT4G24540.1	AGL24
BnaA04g02200D	GSBRNA2T00149075001	chrA04	1424421	1427786	AT4G34530.1	CIB1
BnaA04g02430D	GSBRNA2T00149041001	chrA04	1587652	1589593	AT3G57390.1	AGL18
BnaA04g02460D	GSBRNA2T00149038001	chrA04	1616195	1626509	AT3G12810.1	PIE1
BnaA04g02780D	GSBRNA2T00126238001	chrA04	1865066	1866354	AT3G56850.1	AREB3
BnaA04g03660D	GSBRNA2T00126371001	chrA04	2486646	2488734	AT5G39660.1	CDF2
BnaA04g04160D	GSBRNA2T00126445001	chrA04	3055810	3057791	AT5G23260.1	AGL32
BnaA04g04280D	GSBRNA2T00126461001	chrA04	3148726	3151347	AT2G23080.1	CKA2
BnaA04g04550D	GSBRNA2T00126496001	chrA04	3350253	3352443	AT3G33520.1	ARP6
BnaA04g08680D	GSBRNA2T00114434001	chrA04	7696408	7698133	AT5G38480.1	GRF3
BnaA04g09490D	GSBRNA2T00114307001	chrA04	8478697	8480748	AT5G39660.1	CDF2
BnaA04g10760D	GSBRNA2T00092092001	chrA04	9402510	9403172	AT5G08330.1	CHE
BnaA04g12990D	GSBRNA2T00032884001	chrA04	10961147	10963402	AT2G22540.1	SVP
BnaA04g13050D	GSBRNA2T00032893001	chrA04	11005639	11008697	AT2G22540.1	SVP
BnaA04g13190D	GSBRNA2T00032909001	chrA04	11068672	11071386	AT1G77300.1	EFS
BnaA04g13490D	GSBRNA2T00066969001	chrA04	11398484	11401431	AT2G23070.1	CKA2
BnaA04g13630D	GSBRNA2T00066992001	chrA04	11524589	11529333	AT2G23380.1	CLF
BnaA04g13850D	GSBRNA2T00068247001	chrA04	11704476	11710607	AT1G77300.1	EFS
BnaA04g14640D	GSBRNA2T00082326001	chrA04	12323226	12324374	AT2G24790.1	AtCOL3
BnaA04g14760D	GSBRNA2T00058348001	chrA04	12403142	12406015	AT2G46790.1	PRR9
BnaA04g15260D	GSBRNA2T00058288001	chrA04	12693368	12696498	AT2G25930.1	ELF3
BnaA04g15540D	GSBRNA2T00089005001	chrA04	12878138	12880151	AT1G47250.1	PAF2
BnaA04g15930D	GSBRNA2T00045264001	chrA04	13110274	13111996	AT2G27550.1	TSF
BnaA04g16440D	GSBRNA2T00010594001	chrA04	13430440	13432012	AT1G69570.1	CDF3
BnaA04g16710D	GSBRNA2T00050377001	chrA04	13660146	13661836	AT5G62430.1	CDF1
BnaA04g19110D	GSBRNA2T00006462001	chrA04	15157776	15159085	AT2G32950.1	COP1
BnaA04g19840D	GSBRNA2T00064576001	chrA04	15462653	15463366	AT2G33810.1	SPL
BnaA04g19980D	GSBRNA2T00064561001	chrA04	15510939	15511445	AT2G34140.1	CDF3
BnaA04g20420D	GSBRNA2T00076994001	chrA04	15742190	15745764	AT3G48430.1	REF6
BnaA04g20920D	GSBRNA2T00069638001	chrA04	15991452	15994150	AT3G48430.1	REF6
BnaA04g21250D	GSBRNA2T00005464001	chrA04	16196319	16197903	AT2G37060.1	HAP3B
BnaA04g21270D	GSBRNA2T00005462001	chrA04	16208767	16210237	AT2G37060.1	HAP3B
BnaA04g22640D	GSBRNA2T00123369001	chrA04	17004614	17005280	AT2G40080.1	ELF4
BnaA04g23690D	GSBRNA2T00123250001	chrA04	17514725	17516695	AT2G41070.1	AREB3
BnaA04g24300D	GSBRNA2T00123170001	chrA04	17830329	17833575	AT3G33520.1	ARP6
BnaA04g24340D	GSBRNA2T00123166001	chrA04	17845227	17847617	AT2G33810.1	SPL
BnaA04g24770D	GSBRNA2T00045067001	chrA04	18029592	18033188	AT3G10390.1	FLD
BnaA04g26320D	GSBRNA2T00063263001	chrA04	18732428	18735897	AT4G24540.1	AGL24
BnaA04g26610D	GSBRNA2T00063292001	chrA04	18813443	18822973	AT3G12810.1	PIE1
BnaA04g26650D	GSBRNA2T00063296001	chrA04	18855627	18857501	AT5G67380.1	CKA1
BnaA04g26750D	GSBRNA2T00088661001	chrA04	18944287	18946731	AT2G46790.1	PRR9
BnaA04g26820D	GSBRNA2T00088653001	chrA04	18980054	18981210	AT1G68840.1	TEM2
BnaA04g27160D	GSBRNA2T00034274001	chrA04	19134953	19136796	AT1G69570.1	CDF3
BnaA04g27470D	GSBRNA2T00025123001	chrA04_random	117348	118387	AT1G68840.1	TEM2
BnaA04g27480D	GSBRNA2T00025125001	chrA04_random	124360	125405	AT1G68840.1	TEM2
BnaA04g27550D	GSBRNA2T00034335001	chrA04_random	154881	156614	AT2G33810.1	SPL
BnaA04g29020D	GSBRNA2T00045475001	chrA04_random	1140048	1141940	AT3G33520.1	ARP6
BnaA04g29070D	GSBRNA2T00045481001	chrA04_random	1156818	1158282	AT2G34140.1	CDF3
BnaA05g00200D	GSBRNA2T00133043001	chrA05	100806	101457	AT5G47640.1	HAP3B
BnaA05g00780D	GSBRNA2T00132972001	chrA05	457708	461739	AT2G33810.1	SPL
BnaA05g01030D	GSBRNA2T00132940001	chrA05	571895	573071	AT1G13260.1	RAV1
BnaA05g01090D	GSBRNA2T00132933001	chrA05	595527	597428	AT2G46790.1	PRR9
BnaA05g01260D	GSBRNA2T00132911001	chrA05	736182	737866	AT5G39660.1	CDF2
BnaA05g01470D	GSBRNA2T00132884001	chrA05	854155	858912	AT2G46340.1	SPA1
BnaA05g01930D	GSBRNA2T00132825001	chrA05	1085337	1086080	AT3G46640.1	LUX
BnaA05g01970D	GSBRNA2T00132821001	chrA05	1106190	1107659	AT2G41070.1	AREB3
BnaA05g02500D	GSBRNA2T00132760001	chrA05	1378168	1380666	AT2G23080.1	CKA2
BnaA05g02680D	GSBRNA2T00132740001	chrA05	1443071	1445187	AT2G33810.1	SPL
BnaA05g02730D	GSBRNA2T00132735001	chrA05	1461289	1464273	AT4G34530.1	CIB1
BnaA05g02990D	GSBRNA2T00132708001	chrA05	1619288	1623119	AT4G24540.1	AGL24
BnaA05g03140D	GSBRNA2T00132686001	chrA05	1705975	1710201	AT2G23080.1	CKA2
BnaA05g03310D	GSBRNA2T00132666001	chrA05	1848393	1853826	AT2G43410.1	FPA
BnaA05g03550D	GSBRNA2T00132632001	chrA05	1937081	1939331	AT3G50000.1	CKA2
BnaA05g03780D	GSBRNA2T00132606001	chrA05	2018708	2020905	AT1G77300.1	EFS
BnaA05g04480D	GSBRNA2T00116661001	chrA05	2400027	2404158	AT3G12810.1	PIE1
BnaA05g05000D	GSBRNA2T00116722001	chrA05	2622586	2624677	AT3G57390.1	AGL18
BnaA05g05010D	GSBRNA2T00116723001	chrA05	2627051	2630394	AT4G24540.1	AGL24
BnaA05g05020D	GSBRNA2T00116725001	chrA05	2637451	2638428	AT5G08330.1	CHE
BnaA05g05340D	GSBRNA2T00116761001	chrA05	2762383	2764292	AT5G67380.1	CKA1
BnaA05g05560D	GSBRNA2T00116784001	chrA05	2910323	2910896	AT2G40080.1	ELF4
BnaA05g06190D	GSBRNA2T00116865001	chrA05	3302275	3306910	AT5G04240.1	ELF6
BnaA05g06260D	GSBRNA2T00116872001	chrA05	3332868	3334807	AT2G38880.1	HAP3A
BnaA05g06900D	GSBRNA2T00116950001	chrA05	3744935	3747468	AT3G33520.1	ARP6
BnaA05g06930D	GSBRNA2T00116954001	chrA05	3763468	3764648	AT3G47500.1	CDF3
BnaA05g07780D	GSBRNA2T00117060001	chrA05	4223646	4225750	AT4G16845.1	VRN2
BnaA05g08020D	GSBRNA2T00117088001	chrA05	4413679	4416365	AT3G44460.1	AtbZIP67
BnaA05g08190D	GSBRNA2T00117107001	chrA05	4493664	4496384	AT1G68840.1	TEM2
BnaA05g08350D	GSBRNA2T00050335001	chrA05	4633553	4636226	AT2G35670.1	FIE2
BnaA05g09840D	GSBRNA2T00095270001	chrA05	5425249	5426076	AT2G33810.1	SPL
BnaA05g11700D	GSBRNA2T00048587001	chrA05	6621893	6626107	AT2G23080.1	CKA2
BnaA05g12750D	GSBRNA2T00066206001	chrA05	7402822	7406570	AT5G35840.1	PHYC
BnaA05g13110D	GSBRNA2T00125657001	chrA05	7763736	7765481	AT4G34530.1	CIB1
BnaA05g14110D	GSBRNA2T00125516001	chrA05	8648747	8650738	AT1G47250.1	PAF2
BnaA05g14400D	GSBRNA2T00033281001	chrA05	8892904	8896006	AT3G50000.1	CKA2
BnaA05g14670D	GSBRNA2T00033324001	chrA05	9132095	9132716	AT2G33810.1	SPL
BnaA05g14700D	GSBRNA2T00033328001	chrA05	9158417	9159820	AT1G53090.1	SPA4
BnaA05g14710D	GSBRNA2T00033329001	chrA05	9164661	9170427	AT1G53090.1	SPA4
BnaA05g14720D	GSBRNA2T00033330001	chrA05	9170965	9174465	AT2G23070.1	CKA2
BnaA05g15330D	GSBRNA2T00077516001	chrA05	9793933	9794790	AT1G69570.1	CDF3
BnaA05g15470D	GSBRNA2T00043369001	chrA05	9954446	9959475	AT4G36920.1	AP2
BnaA05g15500D	GSBRNA2T00043362001	chrA05	10010247	10011281	AT1G51120.1	RAV1-like
BnaA05g15710D	GSBRNA2T00043338001	chrA05	10202595	10203572	AT1G50680.1	RAV1-like
BnaA05g16150D	GSBRNA2T00042915001	chrA05	10752746	10754365	AT3G18990.1	VRN1
BnaA05g17500D	GSBRNA2T00023940001	chrA05	12379295	12384461	AT3G12810.1	PIE1
BnaA05g18320D	GSBRNA2T00040246001	chrA05	13631827	13633429	AT1G35160.1	GRF4
BnaA05g19140D	GSBRNA2T00029492001	chrA05	14465245	14470104	AT3G12810.1	PIE1
BnaA05g20050D	GSBRNA2T00009262001	chrA05	15472420	15475036	AT4G36920.1	AP2
BnaA05g20750D	GSBRNA2T00091719001	chrA05	16107308	16109466	AT2G23070.1	CKA2
BnaA05g20870D	GSBRNA2T00154048001	chrA05	16192619	16195405	AT3G19290.1	ABF4
BnaA05g20990D	GSBRNA2T00154036001	chrA05	16269064	16274938	AT3G12810.1	PIE1
BnaA05g21140D	GSBRNA2T00154017001	chrA05	16377993	16380612	AT3G18990.1	VRN1
BnaA05g21350D	GSBRNA2T00153994001	chrA05	16476529	16478913	AT3G33520.1	ARP6
BnaA05g21360D	GSBRNA2T00153993001	chrA05	16479772	16481486	AT3G33520.1	ARP6
BnaA05g22000D	GSBRNA2T00153915001	chrA05	16899351	16900972	AT5G58230.1	MSI1
BnaA05g22170D	GSBRNA2T00153897001	chrA05	16960871	16964615	AT3G50000.1	CKA2
BnaA05g22950D	GSBRNA2T00153802001	chrA05	17432670	17437133	AT2G18790.1	PHYB
BnaA05g23050D	GSBRNA2T00153791001	chrA05	17473783	17477513	AT2G46790.1	PRR9
BnaA05g24250D	GSBRNA2T00104889001	chrA05	18186441	18189745	AT3G15354.1	SPA3
BnaA05g24340D	GSBRNA2T00104877001	chrA05	18225625	18227675	AT2G33810.1	SPL
BnaA05g24830D	GSBRNA2T00104813001	chrA05	18502208	18504741	AT3G50000.1	CKA2
BnaA05g26370D	GSBRNA2T00000155001	chrA05	19333818	19342465	AT3G12810.1	PIE1
BnaA05g26910D	GSBRNA2T00000222001	chrA05	19546142	19548451	AT3G33520.1	ARP6
BnaA05g27480D	GSBRNA2T00000286001	chrA05	19800892	19803319	AT1G68840.1	TEM2
BnaA05g28150D	GSBRNA2T00000369001	chrA05	20078356	20079506	AT3G46640.1	LUX
BnaA05g30270D	GSBRNA2T00059474001	chrA05	20933063	20935109	AT4G34530.1	CIB1
BnaA05g30940D	GSBRNA2T00027079001	chrA05	21429713	21435328	AT3G12810.1	PIE1
BnaA05g31460D	GSBRNA2T00038539001	chrA05	21735547	21738589	AT2G23080.1	CKA2
BnaA05g32100D	GSBRNA2T00038607001	chrA05	22048509	22051952	AT5G67380.1	CKA1
BnaA05g32170D	GSBRNA2T00038616001	chrA05	22075355	22078399	AT5G27220.1	FRI
BnaA05g33430D	GSBRNA2T00003647001	chrA05	22647496	22649388	AT3G02520.1	GRF7
BnaA05g33600D	GSBRNA2T00022303001	chrA05	22702704	22705098	AT3G57390.1	AGL18
BnaA05g34110D	GSBRNA2T00064167001	chrA05	23031775	23037597	AT5G67380.1	CKA1
BnaA05g34380D	GSBRNA2T00016976001	chrA05_random	101395	104045	AT3G10390.1	FLD
BnaA05g34990D	GSBRNA2T00007242001	chrA05_random	515589	519301	AT2G32950.1	COP1
BnaA05g36670D	GSBRNA2T00003491001	chrA05_random	2611820	2613920	AT3G21320.1	ELF3
BnaA05g36740D	GSBRNA2T00003498001	chrA05_random	2640535	2641263	AT3G47500.1	CDF3
BnaA06g00680D	GSBRNA2T00024610001	chrA06	447254	452344	AT1G47250.1	PAF2
BnaA06g00890D	GSBRNA2T00024638001	chrA06	619650	623025	AT3G50000.1	CKA2
BnaA06g01110D	GSBRNA2T00024664001	chrA06	731083	732077	AT2G33810.1	SPL
BnaA06g01120D	GSBRNA2T00024665001	chrA06	738750	740306	AT3G57390.1	AGL18
BnaA06g02510D	GSBRNA2T00021173001	chrA06	1438200	1439216	AT1G51120.1	RAV1-like
BnaA06g02630D	GSBRNA2T00021160001	chrA06	1560685	1563915	AT1G50680.1	RAV1-like
BnaA06g02760D	GSBRNA2T00021143001	chrA06	1646486	1647532	AT1G51120.1	RAV1-like
BnaA06g03040D	GSBRNA2T00098081001	chrA06	1843059	1845065	AT1G49720.1	ABF1
BnaA06g04980D	GSBRNA2T00156226001	chrA06	2861796	2871575	AT3G12810.1	PIE1
BnaA06g04990D	GSBRNA2T00156225001	chrA06	2872681	2877946	AT3G48430.1	REF6
BnaA06g05230D	GSBRNA2T00156196001	chrA06	2982168	2983799	AT1G08970.1	HAP5C
BnaA06g05470D	GSBRNA2T00156170001	chrA06	3098826	3105138	AT1G09570.1	PHYA
BnaA06g05520D	GSBRNA2T00156165001	chrA06	3119481	3122158	AT2G23070.1	CKA2
BnaA06g05770D	GSBRNA2T00156140001	chrA06	3200636	3204525	AT2G23080.1	CKA2
BnaA06g06010D	GSBRNA2T00156115001	chrA06	3309328	3311812	AT3G50000.1	CKA2
BnaA06g06210D	GSBRNA2T00156091001	chrA06	3393471	3395289	AT4G34530.1	CIB1
BnaA06g07470D	GSBRNA2T00105354001	chrA06	3998760	3999785	AT1G13260.1	RAV1
BnaA06g07950D	GSBRNA2T00105417001	chrA06	4259855	4260641	AT5G67380.1	CKA1
BnaA06g08990D	GSBRNA2T00092339001	chrA06	4878064	4880435	AT3G04610.1	FLK
BnaA06g10760D	GSBRNA2T00057936001	chrA06	5651550	5654304	AT4G36920.1	AP2
BnaA06g11730D	GSBRNA2T00034914001	chrA06	6088673	6089763	AT1G17455.1	ELF4
BnaA06g12320D	GSBRNA2T00034844001	chrA06	6403594	6405677	AT1G18100.1	TSF
BnaA06g12330D	GSBRNA2T00034843001	chrA06	6407513	6410977	AT2G23080.1	CKA2
BnaA06g12520D	GSBRNA2T00034819001	chrA06	6502057	6503575	AT4G34530.1	CIB1
BnaA06g12770D	GSBRNA2T00035656001	chrA06	6637009	6640076	AT1G68050.1	FKF1
BnaA06g15080D	GSBRNA2T00096208001	chrA06	8276487	8277248	AT1G69570.1	CDF3
BnaA06g16420D	GSBRNA2T00125355001	chrA06	9223546	9224734	AT5G63470.1	HAP5C
BnaA06g16550D	GSBRNA2T00125332001	chrA06	9325992	9331626	AT3G48430.1	REF6
BnaA06g17280D	GSBRNA2T00063089001	chrA06	9828978	9830759	AT5G08330.1	CHE
BnaA06g17950D	GSBRNA2T00107253001	chrA06	10232149	10233078	AT3G46640.1	LUX
BnaA06g18000D	GSBRNA2T00107261001	chrA06	10265604	10267699	AT2G23080.1	CKA2
BnaA06g18020D	GSBRNA2T00107263001	chrA06	10272438	10274455	AT3G33520.1	ARP6
BnaA06g18440D	GSBRNA2T00107313001	chrA06	10591672	10593539	AT2G23080.1	CKA2
BnaA06g18950D	GSBRNA2T00064925001	chrA06	11207700	11210621	AT5G67380.1	CKA1
BnaA06g20460D	GSBRNA2T00016299001	chrA06	13958243	13960092	AT3G33520.1	ARP6
BnaA06g21270D	GSBRNA2T00109773001	chrA06	14739605	14741020	AT5G13480.1	FY
BnaA06g21490D	GSBRNA2T00109800001	chrA06	14924705	14925727	AT5G62040.1	BFT
BnaA06g21870D	GSBRNA2T00109864001	chrA06	15285878	15287401	AT5G62430.1	CDF1
BnaA06g22420D	GSBRNA2T00109930001	chrA06	15665905	15667411	AT3G47500.1	CDF3
BnaA06g23080D	GSBRNA2T00077271001	chrA06	16103308	16109928	AT3G12810.1	PIE1
BnaA06g23990D	GSBRNA2T00000787001	chrA06	16592843	16597501	AT5G65060.1	MAF3
BnaA06g24000D	GSBRNA2T00000786001	chrA06	16600704	16604613	AT5G65070.1	MAF4
BnaA06g24300D	GSBRNA2T00000736001	chrA06	16879174	16881192	AT5G65430.1	GRF8
BnaA06g24400D	GSBRNA2T00000719001	chrA06	16993729	16996869	AT4G36920.1	AP2
BnaA06g24490D	GSBRNA2T00000710001	chrA06	17014272	17014862	AT3G47500.1	CDF3
BnaA06g25100D	GSBRNA2T00042180001	chrA06	17351502	17352874	AT4G30200.2	VEL1
BnaA06g25320D	GSBRNA2T00042151001	chrA06	17485814	17487715	AT4G34530.1	CIB1
BnaA06g26010D	GSBRNA2T00147414001	chrA06	17972068	17973243	AT5G08330.1	CHE
BnaA06g26170D	GSBRNA2T00147434001	chrA06	18039880	18045188	AT5G13480.1	FY
BnaA06g26980D	GSBRNA2T00147540001	chrA06	18515920	18519844	AT5G24470.1	PRR5
BnaA06g27280D	GSBRNA2T00147577001	chrA06	18725638	18728443	AT1G04400.2	CRY2
BnaA06g27360D	GSBRNA2T00147590001	chrA06	18793916	18795738	AT5G24930.1	AtCOL4
BnaA06g28290D	GSBRNA2T00147718001	chrA06	19444715	19447478	AT2G23070.1	CKA2
BnaA06g28910D	GSBRNA2T00144239001	chrA06	19780808	19783138	AT5G27220.1	FRI
BnaA06g28920D	GSBRNA2T00144240001	chrA06	19783211	19784745	AT5G27220.1	FRI
BnaA06g28950D	GSBRNA2T00144244001	chrA06	19805072	19808041	AT2G23080.1	CKA2
BnaA06g30130D	GSBRNA2T00144409001	chrA06	20413142	20417364	AT4G34530.1	CIB1
BnaA06g30140D	GSBRNA2T00144410001	chrA06	20417513	20420159	AT4G34530.1	CIB1
BnaA06g30700D	GSBRNA2T00144478001	chrA06	20719797	20722987	AT2G22540.1	SVP
BnaA06g32480D	GSBRNA2T00078098001	chrA06	21641540	21642475	AT5G08330.1	CHE
BnaA06g32490D	GSBRNA2T00078097001	chrA06	21643355	21646103	AT3G33520.1	ARP6
BnaA06g33420D	GSBRNA2T00077984001	chrA06	22117657	22121140	AT3G25730.1	RAV1-like
BnaA06g34930D	GSBRNA2T00001893001	chrA06	23101655	23104455	AT2G23070.1	CKA2
BnaA06g35340D	GSBRNA2T00001940001	chrA06	23271611	23272448	AT2G38880.1	HAP3A
BnaA06g36130D	GSBRNA2T00054699001	chrA06	23716614	23720002	AT3G04610.1	FLK
BnaA06g36330D	GSBRNA2T00018780001	chrA06	23819568	23820457	AT5G44080.1	AREB3
BnaA06g36680D	GSBRNA2T00018823001	chrA06	23990221	23995126	AT3G12810.1	PIE1
BnaA06g36780D	GSBRNA2T00018836001	chrA06	24045248	24048658	AT2G33810.1	SPL
BnaA06g37000D	GSBRNA2T00018864001	chrA06	24141291	24143218	AT5G42910.1	AtbZIP15
BnaA06g37950D	GSBRNA2T00022857001	chrA06_random	235311	237282	AT4G34530.1	CIB1
BnaA06g38360D	GSBRNA2T00066885001	chrA06_random	512289	517804	AT2G43410.1	FPA
BnaA06g39070D	GSBRNA2T00044067001	chrA06_random	1264186	1266941	AT5G61850.1	LFY
BnaA06g39810D	GSBRNA2T00002955001	chrA06_random	1751985	1754419	AT5G23260.1	AGL32
BnaA07g00230D	GSBRNA2T00050767001	chrA07	226799	228732	AT3G33520.1	ARP6
BnaA07g01150D	GSBRNA2T00059409001	chrA07	827554	829397	AT5G58230.1	MSI1
BnaA07g01200D	GSBRNA2T00059404001	chrA07	839928	849566	AT2G19520.1	FVE
BnaA07g01230D	GSBRNA2T00067296001	chrA07	869441	871643	AT2G18915.2	LKP2
BnaA07g01240D	GSBRNA2T00067297001	chrA07	873637	876898	AT2G18915.2	LKP2
BnaA07g01250D	GSBRNA2T00067299001	chrA07	880078	882631	AT2G18915.2	LKP2
BnaA07g01610D	GSBRNA2T00092731001	chrA07	1255657	1259766	AT2G23070.1	CKA2
BnaA07g01930D	GSBRNA2T00083702001	chrA07	1625817	1627646	AT2G23080.1	CKA2
BnaA07g02010D	GSBRNA2T00083691001	chrA07	1683576	1685596	AT4G34530.1	CIB1
BnaA07g03000D	GSBRNA2T00026595001	chrA07	2607049	2607995	AT2G17770.1	FDP
BnaA07g04410D	GSBRNA2T00054275001	chrA07	4701831	4703712	AT1G47250.1	PAF2
BnaA07g05640D	GSBRNA2T00128275001	chrA07	5963597	5964769	AT3G24440.1	VRN5
BnaA07g05650D	GSBRNA2T00128276001	chrA07	5967863	5970137	AT3G24440.1	VRN5
BnaA07g06260D	GSBRNA2T00128358001	chrA07	6585159	6587225	AT4G34530.1	CIB1
BnaA07g08180D	GSBRNA2T00089847001	chrA07	8335143	8335998	AT1G29160.1	CDF3
BnaA07g08490D	GSBRNA2T00089891001	chrA07	8595188	8596935	AT3G47500.1	CDF3
BnaA07g08830D	GSBRNA2T00089936001	chrA07	8899397	8901429	AT2G33810.1	SPL
BnaA07g08840D	GSBRNA2T00089937001	chrA07	8901694	8904295	AT2G33810.1	SPL
BnaA07g08950D	GSBRNA2T00089950001	chrA07	8934202	8936192	AT3G57390.1	AGL18
BnaA07g09490D	GSBRNA2T00069405001	chrA07	9268831	9270296	AT4G09000.1	GRF1
BnaA07g10500D	GSBRNA2T00085933001	chrA07	9962120	9963646	AT1G78300.1	GRF2
BnaA07g10560D	GSBRNA2T00085924001	chrA07	10005437	10007440	AT5G38480.1	GRF3
BnaA07g10770D	GSBRNA2T00112245001	chrA07	10129311	10131376	AT5G47640.1	HAP3B
BnaA07g11180D	GSBRNA2T00112315001	chrA07	10494622	10496350	AT2G23080.1	CKA2
BnaA07g11800D	GSBRNA2T00112397001	chrA07	10902664	10904367	AT3G12810.1	PIE1
BnaA07g12050D	GSBRNA2T00112432001	chrA07	11102251	11104689	AT5G67180.1	TOE3
BnaA07g12230D	GSBRNA2T00112456001	chrA07	11188230	11188892	AT3G47500.1	CDF3
BnaA07g12990D	GSBRNA2T00118631001	chrA07	11649057	11651143	AT1G47250.1	PAF2
BnaA07g13290D	GSBRNA2T00118670001	chrA07	11803722	11805674	AT2G27550.1	TSF
BnaA07g13990D	GSBRNA2T00118765001	chrA07	12369151	12371892	AT2G28550.1	TOE1
BnaA07g14450D	GSBRNA2T00098490001	chrA07	12758412	12760192	AT5G38480.1	GRF3
BnaA07g14690D	GSBRNA2T00098523001	chrA07	12900229	12907775	AT2G23070.1	CKA2
BnaA07g14740D	GSBRNA2T00098534001	chrA07	12947448	12949013	AT5G39660.1	CDF2
BnaA07g16350D	GSBRNA2T00098740001	chrA07	13870810	13874975	AT4G36920.1	AP2
BnaA07g16990D	GSBRNA2T00098828001	chrA07	14327414	14328525	AT3G56850.1	AREB3
BnaA07g17090D	GSBRNA2T00098840001	chrA07	14363518	14367606	AT1G77300.1	EFS
BnaA07g17280D	GSBRNA2T00098861001	chrA07	14469498	14471165	AT3G57390.1	AGL18
BnaA07g17500D	GSBRNA2T00098895001	chrA07	14634268	14637346	AT4G34530.1	CIB1
BnaA07g17550D	GSBRNA2T00098900001	chrA07	14658857	14660105	AT2G33810.1	SPL
BnaA07g17770D	GSBRNA2T00098924001	chrA07	14756957	14757986	AT1G56170.1	HAP5B
BnaA07g18050D	GSBRNA2T00098954001	chrA07	14875022	14881448	AT4G24540.1	AGL24
BnaA07g18130D	GSBRNA2T00098963001	chrA07	14918864	14921918	AT3G10390.1	FLD
BnaA07g18500D	GSBRNA2T00099006001	chrA07	15068170	15069861	AT5G13480.1	FY
BnaA07g18530D	GSBRNA2T00099009001	chrA07	15084819	15087574	AT3G50000.1	CKA2
BnaA07g18580D	GSBRNA2T00099015001	chrA07	15109224	15112095	AT1G77300.1	EFS
BnaA07g18960D	GSBRNA2T00099054001	chrA07	15274874	15277625	AT3G50000.1	CKA2
BnaA07g19120D	GSBRNA2T00099072001	chrA07	15428972	15430092	AT1G68840.1	TEM2
BnaA07g19540D	GSBRNA2T00099122001	chrA07	15596042	15603049	AT5G23150.1	HUA2
BnaA07g20430D	GSBRNA2T00099220001	chrA07	16012589	16014883	AT5G42790.1	PAF1
BnaA07g20620D	GSBRNA2T00099241001	chrA07	16095183	16097081	AT1G78300.1	GRF2
BnaA07g22580D	GSBRNA2T00099483001	chrA07	17187002	17190697	AT2G23080.1	CKA2
BnaA07g23470D	GSBRNA2T00099600001	chrA07	17675664	17677958	AT2G23070.1	CKA2
BnaA07g24230D	GSBRNA2T00124299001	chrA07	18119292	18121231	AT1G69570.1	CDF3
BnaA07g24360D	GSBRNA2T00124318001	chrA07	18230073	18234258	AT3G57390.1	AGL18
BnaA07g25310D	GSBRNA2T00124448001	chrA07	18855196	18857952	AT4G20370.1	TSF
BnaA07g26000D	GSBRNA2T00102185001	chrA07	19185410	19187602	AT2G23080.1	CKA2
BnaA07g26500D	GSBRNA2T00102125001	chrA07	19459555	19463141	AT5G67380.1	CKA1
BnaA07g27570D	GSBRNA2T00101994001	chrA07	20045145	20047767	AT4G34530.1	CIB1
BnaA07g27710D	GSBRNA2T00101980001	chrA07	20115940	20119823	AT3G57390.1	AGL18
BnaA07g27730D	GSBRNA2T00101976001	chrA07	20143703	20144602	AT2G33810.1	SPL
BnaA07g28120D	GSBRNA2T00101928001	chrA07	20343138	20344540	AT1G69570.1	CDF3
BnaA07g29410D	GSBRNA2T00102480001	chrA07	21056799	21059474	AT2G23070.1	CKA2
BnaA07g29450D	GSBRNA2T00102484001	chrA07	21069694	21072408	AT4G24540.1	AGL24
BnaA07g29810D	GSBRNA2T00102522001	chrA07	21256250	21257516	AT5G08330.1	CHE
BnaA07g30330D	GSBRNA2T00102587001	chrA07	21508444	21509639	AT1G72630.1	ELF4
BnaA07g31450D	GSBRNA2T00102717001	chrA07	21971281	21974365	AT5G67380.1	CKA1
BnaA07g32850D	GSBRNA2T00146593001	chrA07	22641769	22643530	AT2G23080.1	CKA2
BnaA07g32890D	GSBRNA2T00146589001	chrA07	22660796	22665110	AT2G33810.1	SPL
BnaA07g33020D	GSBRNA2T00146572001	chrA07	22719804	22721972	AT1G77300.1	EFS
BnaA07g33120D	GSBRNA2T00146560001	chrA07	22787807	22790354	AT4G20370.1	TSF
BnaA07g33460D	GSBRNA2T00146519001	chrA07	22947562	22954942	AT1G77300.1	EFS
BnaA07g34090D	GSBRNA2T00146447001	chrA07	23264229	23265600	AT1G35160.1	GRF4
BnaA07g34180D	GSBRNA2T00146436001	chrA07	23301688	23303984	AT1G78300.1	GRF2
BnaA07g34730D	GSBRNA2T00146374001	chrA07	23555125	23557704	AT5G42790.1	PAF1
BnaA07g35130D	GSBRNA2T00146328001	chrA07	23727755	23730811	AT4G36920.1	AP2
BnaA07g37300D	GSBRNA2T00030503001	chrA07_random	996169	996954	AT1G69570.1	CDF3
BnaA07g37430D	GSBRNA2T00011542001	chrA07_random	1083271	1087127	AT3G12810.1	PIE1
BnaA07g38970D	GSBRNA2T00058707001	chrA07_random	1930796	1932126	AT4G34530.1	CIB1
BnaA07g38990D	GSBRNA2T00028225001	chrA07_random	1946119	1947847	AT2G23080.1	CKA2
BnaA08g00100D	GSBRNA2T00074697001	chrA08	75592	77524	AT3G33520.1	ARP6
BnaA08g01000D	GSBRNA2T00114135001	chrA08	724470	729754	AT5G42790.1	PAF1
BnaA08g01320D	GSBRNA2T00114193001	chrA08	1017517	1020659	AT5G67380.1	CKA1
BnaA08g01830D	GSBRNA2T00085759001	chrA08	1501865	1502698	AT1G69570.1	CDF3
BnaA08g02030D	GSBRNA2T00085787001	chrA08	1583593	1584612	AT1G51120.1	RAV1-like
BnaA08g02650D	GSBRNA2T00091101001	chrA08	2099592	2101284	AT3G18990.1	VRN1
BnaA08g03730D	GSBRNA2T00094960001	chrA08	3034904	3037376	AT3G47500.1	CDF3
BnaA08g03990D	GSBRNA2T00095005001	chrA08	3279165	3281009	AT1G47250.1	PAF2
BnaA08g05240D	GSBRNA2T00086832001	chrA08	5233312	5236875	AT3G48430.1	REF6
BnaA08g06010D	GSBRNA2T00021096001	chrA08	5912020	5918779	AT3G10390.1	FLD
BnaA08g08130D	GSBRNA2T00127033001	chrA08	8023614	8026967	AT4G16845.1	VRN2
BnaA08g09030D	GSBRNA2T00126919001	chrA08	8711350	8714200	AT2G23070.1	CKA2
BnaA08g10540D	GSBRNA2T00126728001	chrA08	9745642	9749470	AT4G24540.1	AGL24
BnaA08g11120D	GSBRNA2T00126653001	chrA08	10182764	10183974	AT4G34530.1	CIB1
BnaA08g12860D	GSBRNA2T00021823001	chrA08	11310674	11313478	AT1G77300.1	EFS
BnaA08g13150D	GSBRNA2T00078741001	chrA08	11440646	11443395	AT4G30200.2	VEL1
BnaA08g14840D	GSBRNA2T00027297001	chrA08	12446951	12448026	AT4G35900.1	FD
BnaA08g15120D	GSBRNA2T00027253001	chrA08	12637400	12638822	AT1G69570.1	CDF3
BnaA08g15250D	GSBRNA2T00027235001	chrA08	12727177	12728703	AT4G34530.1	CIB1
BnaA08g15790D	GSBRNA2T00079433001	chrA08	13104387	13106947	AT4G36920.1	AP2
BnaA08g15900D	GSBRNA2T00150996001	chrA08	13156881	13160649	AT2G22540.1	SVP
BnaA08g18130D	GSBRNA2T00150717001	chrA08	14249295	14249819	AT1G29160.1	CDF3
BnaA08g18420D	GSBRNA2T00150671001	chrA08	14423853	14425379	AT3G47500.1	CDF3
BnaA08g19410D	GSBRNA2T00059946001	chrA08	14940595	14942561	AT4G34530.1	CIB1
BnaA08g19490D	GSBRNA2T00059936001	chrA08	14982814	14984155	AT1G25560.1	TEM1
BnaA08g19710D	GSBRNA2T00059911001	chrA08	15078533	15082045	AT3G57390.1	AGL18
BnaA08g19740D	GSBRNA2T00034122001	chrA08	15096729	15098310	AT4G09000.1	GRF1
BnaA08g19870D	GSBRNA2T00083997001	chrA08	15154375	15155717	AT1G26790.1	CDF3
BnaA08g20850D	GSBRNA2T00073092001	chrA08	15594700	15596603	AT1G78300.1	GRF2
BnaA08g22490D	GSBRNA2T00102920001	chrA08	16333874	16338770	AT2G23070.1	CKA2
BnaA08g22820D	GSBRNA2T00102957001	chrA08	16450341	16452816	AT2G23080.1	CKA2
BnaA08g25980D	GSBRNA2T00047120001	chrA08	17721988	17724217	AT4G34530.1	CIB1
BnaA08g26100D	GSBRNA2T00047135001	chrA08	17783560	17787393	AT2G23080.1	CKA2
BnaA08g26260D	GSBRNA2T00047151001	chrA08	17829943	17832549	AT2G23070.1	CKA2
BnaA08g26690D	GSBRNA2T00047202001	chrA08	17990349	17991630	AT1G08970.1	HAP5C
BnaA08g26850D	GSBRNA2T00047223001	chrA08	18063295	18068247	AT5G04240.1	ELF6
BnaA08g27870D	GSBRNA2T00089673001	chrA08	18439405	18442637	AT1G04400.2	CRY2
BnaA08g29080D	GSBRNA2T00089813001	chrA08	18942457	18944192	AT3G47500.1	CDF3
BnaA08g30890D	GSBRNA2T00006788001	chrA08_random	1755506	1758209	AT3G57390.1	AGL18
BnaA09g00500D	GSBRNA2T00018384001	chrA09	243397	248630	AT2G23380.1	CLF
BnaA09g01850D	GSBRNA2T00009910001	chrA09	945301	948242	AT3G33520.1	ARP6
BnaA09g01860D	GSBRNA2T00009909001	chrA09	949303	950377	AT5G08330.1	CHE
BnaA09g02740D	GSBRNA2T00009799001	chrA09	1388977	1390669	AT2G22540.1	SVP
BnaA09g03240D	GSBRNA2T00093463001	chrA09	1631287	1632880	AT1G68840.1	TEM2
BnaA09g03630D	GSBRNA2T00009442001	chrA09	1830150	1833951	AT5G27220.1	FRI
BnaA09g03640D	GSBRNA2T00009443001	chrA09	1835880	1839737	AT5G27220.1	FRI
BnaA09g04100D	GSBRNA2T00009502001	chrA09	2051040	2053964	AT2G23070.1	CKA2
BnaA09g04740D	GSBRNA2T00009580001	chrA09	2325220	2327016	AT5G24930.1	AtCOL4
BnaA09g04780D	GSBRNA2T00009585001	chrA09	2347543	2351999	AT1G04400.2	CRY2
BnaA09g04840D	GSBRNA2T00009593001	chrA09	2383745	2386610	AT5G24470.1	PRR5
BnaA09g05170D	GSBRNA2T00094752001	chrA09	2536860	2537975	AT2G32950.1	COP1
BnaA09g05400D	GSBRNA2T00094728001	chrA09	2634978	2636838	AT5G08330.1	CHE
BnaA09g05410D	GSBRNA2T00094727001	chrA09	2642292	2646291	AT5G23260.1	AGL32
BnaA09g05460D	GSBRNA2T00094722001	chrA09	2683396	2684199	AT5G39660.1	CDF2
BnaA09g05500D	GSBRNA2T00094717001	chrA09	2718832	2722094	AT2G22540.1	SVP
BnaA09g05900D	GSBRNA2T00094672001	chrA09	2877003	2880821	AT3G57390.1	AGL18
BnaA09g06160D	GSBRNA2T00094642001	chrA09	3022244	3024064	AT4G34530.1	CIB1
BnaA09g06280D	GSBRNA2T00094627001	chrA09	3103806	3105702	AT1G69570.1	CDF3
BnaA09g07470D	GSBRNA2T00005712001	chrA09	3692203	3696025	AT5G13480.1	FY
BnaA09g07670D	GSBRNA2T00005690001	chrA09	3756862	3757500	AT3G47500.1	CDF3
BnaA09g08300D	GSBRNA2T00063692001	chrA09	4058465	4069133	AT3G12810.1	PIE1
BnaA09g08330D	GSBRNA2T00063695001	chrA09	4084474	4085100	AT5G47640.1	HAP3B
BnaA09g08880D	GSBRNA2T00087532001	chrA09	4416049	4418196	AT5G58230.1	MSI1
BnaA09g09300D	GSBRNA2T00045030001	chrA09	4641766	4642679	AT4G35900.1	FD
BnaA09g09520D	GSBRNA2T00045000001	chrA09	4769934	4772115	AT3G50000.1	CKA2
BnaA09g09600D	GSBRNA2T00044990001	chrA09	4806271	4808292	AT4G34530.1	CIB1
BnaA09g09810D	GSBRNA2T00044960001	chrA09	4972577	4974548	AT3G33520.1	ARP6
BnaA09g09860D	GSBRNA2T00091601001	chrA09	5017280	5020560	AT2G19520.1	FVE
BnaA09g09870D	GSBRNA2T00091602001	chrA09	5021081	5023737	AT5G58230.1	MSI1
BnaA09g10980D	GSBRNA2T00056402001	chrA09	5653122	5661147	AT3G48430.1	REF6
BnaA09g10990D	GSBRNA2T00056403001	chrA09	5661206	5665504	AT3G48430.1	REF6
BnaA09g12680D	GSBRNA2T00086402001	chrA09	6743701	6746394	AT3G10390.1	FLD
BnaA09g14960D	GSBRNA2T00068770001	chrA09	8669368	8671000	AT5G08330.1	CHE
BnaA09g15060D	GSBRNA2T00068784001	chrA09	8734623	8737166	AT2G23080.1	CKA2
BnaA09g15700D	GSBRNA2T00006807001	chrA09	9161210	9163293	AT5G42790.1	PAF1
BnaA09g16340D	GSBRNA2T00053169001	chrA09	9730894	9733179	AT2G33810.1	SPL
BnaA09g17060D	GSBRNA2T00070960001	chrA09	10291682	10294561	AT2G23080.1	CKA2
BnaA09g17700D	GSBRNA2T00070870001	chrA09	10840956	10843462	AT3G50000.1	CKA2
BnaA09g18400D	GSBRNA2T00072378001	chrA09	11446337	11447022	AT5G47640.1	HAP3B
BnaA09g18420D	GSBRNA2T00072381001	chrA09	11452614	11453343	AT5G47640.1	HAP3B
BnaA09g18630D	GSBRNA2T00072406001	chrA09	11571815	11574876	AT2G23070.1	CKA2
BnaA09g18980D	GSBRNA2T00117778001	chrA09	11918025	11922004	AT3G12810.1	PIE1
BnaA09g19420D	GSBRNA2T00117846001	chrA09	12363480	12365662	AT2G22540.1	SVP
BnaA09g21280D	GSBRNA2T00145444001	chrA09	13965533	13969657	AT3G57390.1	AGL18
BnaA09g21650D	GSBRNA2T00145503001	chrA09	14294891	14295899	AT1G69570.1	CDF3
BnaA09g21830D	GSBRNA2T00145529001	chrA09	14467452	14470558	AT3G50000.1	CKA2
BnaA09g22070D	GSBRNA2T00145561001	chrA09	14674057	14679198	AT4G11110.1	SPA2
BnaA09g22690D	GSBRNA2T00145650001	chrA09	15266653	15269073	AT2G23080.1	CKA2
BnaA09g23530D	GSBRNA2T00156480001	chrA09	16143193	16145455	AT2G23080.1	CKA2
BnaA09g25530D	GSBRNA2T00113834001	chrA09	18549867	18552448	AT1G30970.1	SUF4
BnaA09g25710D	GSBRNA2T00113804001	chrA09	18797446	18801930	AT3G48430.1	REF6
BnaA09g27950D	GSBRNA2T00038358001	chrA09	20952763	20954029	AT2G33810.1	SPL
BnaA09g27960D	GSBRNA2T00038356001	chrA09	20954908	20956535	AT2G33810.1	SPL
BnaA09g28040D	GSBRNA2T00038348001	chrA09	20975955	20978708	AT3G57390.1	AGL18
BnaA09g28670D	GSBRNA2T00090567001	chrA09	21598357	21599627	AT1G25560.1	TEM1
BnaA09g28950D	GSBRNA2T00090602001	chrA09	21788246	21789786	AT4G09000.1	GRF1
BnaA09g29270D	GSBRNA2T00090639001	chrA09	21913542	21914743	AT1G26790.1	CDF3
BnaA09g30390D	GSBRNA2T00015763001	chrA09	22588149	22593013	AT1G22770.1	GI
BnaA09g31830D	GSBRNA2T00129258001	chrA09	23706341	23708226	AT1G47250.1	PAF2
BnaA09g32900D	GSBRNA2T00129389001	chrA09	24333453	24334181	AT1G69570.1	CDF3
BnaA09g33640D	GSBRNA2T00129475001	chrA09	24770165	24772100	AT3G53340.1	HAP3B
BnaA09g33970D	GSBRNA2T00129516001	chrA09	24951321	24953503	AT3G33520.1	ARP6
BnaA09g34200D	GSBRNA2T00129547001	chrA09	25102176	25113719	AT3G12810.1	PIE1
BnaA09g34250D	GSBRNA2T00129553001	chrA09	25130490	25134136	AT4G36920.1	AP2
BnaA09g34950D	GSBRNA2T00069363001	chrA09	25537991	25539911	AT1G69570.1	CDF3
BnaA09g36130D	GSBRNA2T00037060001	chrA09	26219385	26221415	AT3G56850.1	AREB3
BnaA09g36650D	GSBRNA2T00121993001	chrA09	26450681	26459732	AT3G12810.1	PIE1
BnaA09g36710D	GSBRNA2T00121984001	chrA09	26494960	26497458	AT3G57390.1	AGL18
BnaA09g37060D	GSBRNA2T00121938001	chrA09	26726095	26729633	AT4G34530.1	CIB1
BnaA09g37880D	GSBRNA2T00121834001	chrA09	27193092	27197402	AT2G43410.1	FPA
BnaA09g38000D	GSBRNA2T00121818001	chrA09	27265933	27268351	AT3G50000.1	CKA2
BnaA09g38010D	GSBRNA2T00121817001	chrA09	27270608	27272745	AT3G50000.1	CKA2
BnaA09g38210D	GSBRNA2T00072603001	chrA09	27345059	27347078	AT1G77300.1	EFS
BnaA09g38810D	GSBRNA2T00006761001	chrA09	27647940	27650510	AT2G23080.1	CKA2
BnaA09g39540D	GSBRNA2T00049448001	chrA09	28042201	28043079	AT1G13260.1	RAV1
BnaA09g40710D	GSBRNA2T00049585001	chrA09	28572519	28575588	AT2G25930.1	ELF3
BnaA09g42220D	GSBRNA2T00093031001	chrA09	29360952	29363675	AT2G23070.1	CKA2
BnaA09g42480D	GSBRNA2T00078179001	chrA09	29590705	29594744	AT2G22540.1	SVP
BnaA09g42530D	GSBRNA2T00078184001	chrA09	29607760	29609580	AT5G16260.1	ELF9
BnaA09g44100D	GSBRNA2T00016144001	chrA09	30340105	30342539	AT5G58230.1	MSI1
BnaA09g44120D	GSBRNA2T00016146001	chrA09	30348962	30352127	AT2G19520.1	FVE
BnaA09g44690D	GSBRNA2T00016217001	chrA09	30670246	30673338	AT3G50000.1	CKA2
BnaA09g44700D	GSBRNA2T00016218001	chrA09	30674929	30676949	AT1G18100.1	TSF
BnaA09g44730D	GSBRNA2T00016221001	chrA09	30685749	30687844	AT2G23080.1	CKA2
BnaA09g44990D	GSBRNA2T00016255001	chrA09	30825601	30826449	AT1G17455.1	ELF4
BnaA09g47720D	GSBRNA2T00057406001	chrA09	32120119	32124847	AT5G13480.1	FY
BnaA09g48020D	GSBRNA2T00057439001	chrA09	32248210	32250262	AT3G12810.1	PIE1
BnaA09g48400D	GSBRNA2T00122299001	chrA09	32428056	32432764	AT2G23080.1	CKA2
BnaA09g48410D	GSBRNA2T00122298001	chrA09	32434233	32438771	AT1G09570.1	PHYA
BnaA09g48620D	GSBRNA2T00122272001	chrA09	32533160	32534650	AT1G08970.1	HAP5C
BnaA09g49200D	GSBRNA2T00122206001	chrA09	32788925	32790868	AT2G23080.1	CKA2
BnaA09g50860D	GSBRNA2T00052492001	chrA09	33557626	33565670	AT3G12810.1	PIE1
BnaA09g51240D	GSBRNA2T00052445001	chrA09	33715032	33719248	AT2G23380.1	CLF
BnaA09g51790D	GSBRNA2T00098330001	chrA09_random	93956	97008	AT2G23080.1	CKA2
BnaA09g52090D	GSBRNA2T00004073001	chrA09_random	238494	239586	AT1G69570.1	CDF3
BnaA09g52290D	GSBRNA2T00028054001	chrA09_random	383040	384955	AT2G23080.1	CKA2
BnaA09g52470D	GSBRNA2T00014587001	chrA09_random	455250	456986	AT5G65430.1	GRF8
BnaA09g52610D	GSBRNA2T00020570001	chrA09_random	520377	524358	AT3G12810.1	PIE1
BnaA09g53540D	GSBRNA2T00065282001	chrA09_random	1323346	1328936	AT3G12810.1	PIE1
BnaA09g53950D	GSBRNA2T00005133001	chrA09_random	2184959	2186501	AT3G47500.1	CDF3
BnaA09g54180D	GSBRNA2T00097489001	chrA09_random	2443860	2444580	AT1G29160.1	CDF3
BnaA09g54740D	GSBRNA2T00069921001	chrA09_random	2781153	2784379	AT3G54990.1	SMZ
BnaA09g55330D	GSBRNA2T00092647001	chrA09_random	3139599	3143645	AT4G24540.1	AGL24
BnaA09g55570D	GSBRNA2T00022778001	chrA09_random	3302049	3306300	AT3G47500.1	CDF3
BnaA09g55820D	GSBRNA2T00018041001	chrA09_random	3433309	3441686	AT3G12810.1	PIE1
BnaA09g57260D	GSBRNA2T00011519001	chrA09_random	4114124	4115795	AT4G34530.1	CIB1
BnaA10g00110D	GSBRNA2T00150582001	chrA10	50557	52163	AT2G33810.1	SPL
BnaA10g00810D	GSBRNA2T00150499001	chrA10	414708	416389	AT1G13260.1	RAV1
BnaA10g01220D	GSBRNA2T00150448001	chrA10	640151	647345	AT2G23380.1	CLF
BnaA10g02110D	GSBRNA2T00150337001	chrA10	1119721	1122966	AT2G23070.1	CKA2
BnaA10g02300D	GSBRNA2T00150315001	chrA10	1197886	1198830	AT5G44080.1	AREB3
BnaA10g02550D	GSBRNA2T00150282001	chrA10	1355924	1358792	AT1G04400.2	CRY2
BnaA10g03160D	GSBRNA2T00086276001	chrA10	1610569	1614588	AT3G12810.1	PIE1
BnaA10g05290D	GSBRNA2T00122962001	chrA10	3047520	3047993	AT1G47250.1	PAF2
BnaA10g05850D	GSBRNA2T00120967001	chrA10	4019556	4021675	AT4G00650.1	FRI
BnaA10g05920D	GSBRNA2T00120953001	chrA10	4123809	4126530	AT2G23070.1	CKA2
BnaA10g06180D	GSBRNA2T00120889001	chrA10	4588445	4592200	AT5G13480.1	FY
BnaA10g06740D	GSBRNA2T00079015001	chrA10	5263397	5269324	AT2G23380.1	CLF
BnaA10g07680D	GSBRNA2T00110227001	chrA10	6155664	6161696	AT4G24540.1	AGL24
BnaA10g07690D	GSBRNA2T00110225001	chrA10	6165681	6165866	AT2G22540.1	SVP
BnaA10g08130D	GSBRNA2T00110147001	chrA10	6779911	6785155	AT5G51230.1	EMF2
BnaA10g08150D	GSBRNA2T00110145001	chrA10	6787722	6790728	AT5G51230.1	EMF2
BnaA10g10150D	GSBRNA2T00095491001	chrA10	8730712	8735228	AT2G23380.1	CLF
BnaA10g11600D	GSBRNA2T00093723001	chrA10	9730460	9732049	AT5G57660.1	ATCOL5
BnaA10g12390D	GSBRNA2T00053267001	chrA10	10229889	10233653	AT3G33520.1	ARP6
BnaA10g12930D	GSBRNA2T00047902001	chrA10	10523731	10526429	AT5G60100.1	PRR3
BnaA10g12950D	GSBRNA2T00047898001	chrA10	10540692	10544231	AT5G60120.1	TOE2
BnaA10g13030D	GSBRNA2T00047889001	chrA10	10577541	10578582	AT1G69570.1	CDF3
BnaA10g15180D	GSBRNA2T00154251001	chrA10	11867864	11869563	AT5G23260.1	AGL32
BnaA10g15680D	GSBRNA2T00154311001	chrA10	12093138	12096185	AT2G23080.1	CKA2
BnaA10g16050D	GSBRNA2T00154359001	chrA10	12327758	12330928	AT3G50000.1	CKA2
BnaA10g16180D	GSBRNA2T00154374001	chrA10	12387361	12391804	AT2G33810.1	SPL
BnaA10g16340D	GSBRNA2T00154392001	chrA10	12448659	12453605	AT3G12810.1	PIE1
BnaA10g17060D	GSBRNA2T00065893001	chrA10	12773599	12775823	AT5G17690.1	LHP1
BnaA10g18060D	GSBRNA2T00135437001	chrA10	13197973	13202171	AT5G16260.1	ELF9
BnaA10g18420D	GSBRNA2T00135487001	chrA10	13354572	13355649	AT5G15850.1	AtCOL1
BnaA10g18430D	GSBRNA2T00135488001	chrA10	13358777	13360064	AT5G15840.1	CONSTANS
BnaA10g18480D	GSBRNA2T00135493001	chrA10	13382485	13385119	AT2G22540.1	SVP
BnaA10g18850D	GSBRNA2T00135538001	chrA10	13553696	13556085	AT3G04610.1	FLK
BnaA10g21750D	GSBRNA2T00135885001	chrA10	14851691	14856319	AT4G36920.1	AP2
BnaA10g21980D	GSBRNA2T00135908001	chrA10	14959187	14961933	AT2G23080.1	CKA2
BnaA10g22080D	GSBRNA2T00135921001	chrA10	14998617	15003197	AT5G10140.1	FLC
BnaA10g22340D	GSBRNA2T00135952001	chrA10	15096791	15099070	AT3G33520.1	ARP6
BnaA10g23140D	GSBRNA2T00136050001	chrA10	15366142	15371906	AT5G23150.1	HUA2
BnaA10g25240D	GSBRNA2T00136293001	chrA10	16278561	16281399	AT3G12810.1	PIE1
BnaA10g25980D	GSBRNA2T00136387001	chrA10	16644395	16649149	AT5G04240.1	ELF6
BnaA10g26300D	GSBRNA2T00136426001	chrA10	16767409	16768474	AT5G03840.1	TFL1
BnaA10g26930D	GSBRNA2T00136503001	chrA10	17061928	17065679	AT5G02810.1	PRR 7
BnaA10g27100D	GSBRNA2T00069547001	chrA10	17144289	17145625	AT1G26790.1	CDF3
BnaA10g28780D	GSBRNA2T00046805001	chrA10_random	1246991	1248976	AT1G45249.1	ABF2
BnaA10g29210D	GSBRNA2T00037495001	chrA10_random	1614477	1616239	AT5G58230.1	MSI1
BnaA10g29230D	GSBRNA2T00037497001	chrA10_random	1624869	1630351	AT1G68050.1	FKF1
BnaA10g29740D	GSBRNA2T00080379001	chrA10_random	1896170	1897744	AT4G36920.1	AP2
BnaA10g29830D	GSBRNA2T00051079001	chrA10_random	1957085	1958990	AT3G57390.1	AGL18
BnaAnng00370D	GSBRNA2T00119572001	chrAnn_random	348479	350179	AT1G26790.1	CDF3
BnaAnng00500D	GSBRNA2T00119585001	chrAnn_random	442250	445678	AT5G02810.1	PRR 7
BnaAnng00810D	GSBRNA2T00119620001	chrAnn_random	609805	611005	AT5G03840.1	TFL1
BnaAnng02090D	GSBRNA2T00060932001	chrAnn_random	1487743	1489278	AT1G35160.1	GRF4
BnaAnng02480D	GSBRNA2T00005943001	chrAnn_random	2052469	2055542	AT2G23070.1	CKA2
BnaAnng02930D	GSBRNA2T00005996001	chrAnn_random	2405020	2407502	AT2G23080.1	CKA2
BnaAnng03050D	GSBRNA2T00006015001	chrAnn_random	2451802	2456978	AT3G12810.1	PIE1
BnaAnng03220D	GSBRNA2T00006038001	chrAnn_random	2657372	2662782	AT3G12810.1	PIE1
BnaAnng03880D	GSBRNA2T00045898001	chrAnn_random	3921279	3923596	AT3G50000.1	CKA2
BnaAnng04140D	GSBRNA2T00045935001	chrAnn_random	4158907	4163093	AT3G53340.1	HAP3B
BnaAnng04950D	GSBRNA2T00064783001	chrAnn_random	5504206	5505120	AT3G47500.1	CDF3
BnaAnng05580D	GSBRNA2T00067889001	chrAnn_random	5937215	5940672	AT3G50000.1	CKA2
BnaAnng06150D	GSBRNA2T00071649001	chrAnn_random	6176440	6177467	AT5G08330.1	CHE
BnaAnng06610D	GSBRNA2T00075525001	chrAnn_random	6688933	6689793	AT5G39660.1	CDF2
BnaAnng06660D	GSBRNA2T00075532001	chrAnn_random	6730723	6734232	AT3G57390.1	AGL18
BnaAnng06990D	GSBRNA2T00075572001	chrAnn_random	6881484	6885087	AT4G24540.1	AGL24
BnaAnng07270D	GSBRNA2T00076684001	chrAnn_random	7144691	7148827	AT3G48430.1	REF6
BnaAnng07530D	GSBRNA2T00077229001	chrAnn_random	7324416	7326100	AT3G44460.1	AtbZIP67
BnaAnng07660D	GSBRNA2T00077247001	chrAnn_random	7397471	7400367	AT1G68840.1	TEM2
BnaAnng07800D	GSBRNA2T00082884001	chrAnn_random	7901803	7905753	AT2G22540.1	SVP
BnaAnng08290D	GSBRNA2T00086647001	chrAnn_random	8918063	8919091	AT4G35900.1	FD
BnaAnng08460D	GSBRNA2T00086878001	chrAnn_random	9019099	9021886	AT3G12810.1	PIE1
BnaAnng08550D	GSBRNA2T00086890001	chrAnn_random	9047600	9052245	AT2G33810.1	SPL
BnaAnng09810D	GSBRNA2T00089502001	chrAnn_random	10511768	10518316	AT3G57390.1	AGL18
BnaAnng10940D	GSBRNA2T00003986001	chrAnn_random	12084365	12087370	AT4G30200.2	VEL1
BnaAnng11080D	GSBRNA2T00004519001	chrAnn_random	12157606	12161590	AT5G58230.1	MSI1
BnaAnng11220D	GSBRNA2T00005035001	chrAnn_random	12212823	12215603	AT1G30970.1	SUF4
BnaAnng11790D	GSBRNA2T00007977001	chrAnn_random	12741834	12742502	AT5G39660.1	CDF2
BnaAnng12030D	GSBRNA2T00008677001	chrAnn_random	13104787	13107606	AT2G23080.1	CKA2
BnaAnng12340D	GSBRNA2T00010606001	chrAnn_random	13380887	13384960	AT3G12810.1	PIE1
BnaAnng13370D	GSBRNA2T00014520001	chrAnn_random	14303638	14306662	AT4G08920.1	CRY1
BnaAnng15950D	GSBRNA2T00025869001	chrAnn_random	16921780	16923426	AT5G17690.1	LHP1
BnaAnng21750D	GSBRNA2T00052175001	chrAnn_random	24178229	24180660	AT2G22540.1	SVP
BnaAnng22700D	GSBRNA2T00055534001	chrAnn_random	25505210	25506448	AT5G63470.1	HAP5C
BnaAnng22720D	GSBRNA2T00055545001	chrAnn_random	25525087	25527145	AT3G47500.1	CDF3
BnaAnng22780D	GSBRNA2T00055610001	chrAnn_random	25598292	25601483	AT3G50000.1	CKA2
BnaAnng23230D	GSBRNA2T00057642001	chrAnn_random	26284388	26288062	AT5G67380.1	CKA1
BnaAnng23700D	GSBRNA2T00059663001	chrAnn_random	27199953	27202954	AT2G23070.1	CKA2
BnaAnng23840D	GSBRNA2T00059761001	chrAnn_random	27307612	27314056	AT5G04240.1	ELF6
BnaAnng24480D	GSBRNA2T00064348001	chrAnn_random	28299382	28300909	AT5G62430.1	CDF1
BnaAnng25050D	GSBRNA2T00066018001	chrAnn_random	28952904	28954548	AT2G33810.1	SPL
BnaAnng26550D	GSBRNA2T00072057001	chrAnn_random	30456414	30458977	AT4G34000.1	ABF3
BnaAnng26720D	GSBRNA2T00072750001	chrAnn_random	30644141	30645287	AT5G08330.1	CHE
BnaAnng28250D	GSBRNA2T00077589001	chrAnn_random	32226977	32229367	AT3G57390.1	AGL18
BnaAnng29600D	GSBRNA2T00083868001	chrAnn_random	33800496	33802487	AT5G38480.1	GRF3
BnaAnng29770D	GSBRNA2T00084263001	chrAnn_random	33948367	33949946	AT5G62430.1	CDF1
BnaAnng30140D	GSBRNA2T00087024001	chrAnn_random	34406075	34408520	AT5G23260.1	AGL32
BnaAnng31110D	GSBRNA2T00089574001	chrAnn_random	35558799	35561492	AT2G23080.1	CKA2
BnaAnng31650D	GSBRNA2T00092816001	chrAnn_random	36231109	36232086	AT5G23260.1	AGL32
BnaAnng33220D	GSBRNA2T00097873001	chrAnn_random	37892551	37893606	AT2G19520.1	FVE
BnaAnng33280D	GSBRNA2T00097946001	chrAnn_random	37972507	37973361	AT3G47500.1	CDF3
BnaAnng34090D	GSBRNA2T00004178001	chrAnn_random	38825589	38827972	AT2G23080.1	CKA2
BnaAnng34220D	GSBRNA2T00004593001	chrAnn_random	38991009	38993362	AT2G23080.1	CKA2
BnaAnng35190D	GSBRNA2T00007906001	chrAnn_random	39976659	39977622	AT5G39660.1	CDF2
BnaAnng35300D	GSBRNA2T00007950001	chrAnn_random	40051554	40053464	AT2G23080.1	CKA2
BnaAnng38300D	GSBRNA2T00017788001	chrAnn_random	43376393	43377754	AT5G67380.1	CKA1
BnaAnng38870D	GSBRNA2T00020516001	chrAnn_random	44221112	44222012	AT3G02380.1	AtCOL2
BnaAnng39160D	GSBRNA2T00021004001	chrAnn_random	44515755	44516639	AT3G02380.1	AtCOL2
BnaAnng40110D	GSBRNA2T00025242001	chrAnn_random	45777057	45778800	AT4G36920.1	AP2
BnaAnng40580D	GSBRNA2T00027433001	chrAnn_random	46431615	46432996	AT1G13260.1	RAV1
BnaAnng41280D	GSBRNA2T00030041001	chrAnn_random	47445855	47447257	AT1G69570.1	CDF3
BnaAnng41900D	GSBRNA2T00034298001	chrAnn_random	48479499	48480609	AT1G69570.1	CDF3
BnaC01g00490D	GSBRNA2T00075144001	chrC01	181470	186335	AT5G13480.1	FY
BnaC01g01040D	GSBRNA2T00131197001	chrC01	429802	430530	AT3G47500.1	CDF3
BnaC01g01080D	GSBRNA2T00131190001	chrC01	472644	475672	AT2G22540.1	SVP
BnaC01g01290D	GSBRNA2T00131160001	chrC01	597811	600339	AT4G36920.1	AP2
BnaC01g01710D	GSBRNA2T00131105001	chrC01	872007	874253	AT4G36920.1	AP2
BnaC01g02720D	GSBRNA2T00130974001	chrC01	1447055	1448112	AT4G35900.1	FD
BnaC01g03860D	GSBRNA2T00130837001	chrC01	2012292	2014478	AT4G34530.1	CIB1
BnaC01g04170D	GSBRNA2T00130794001	chrC01	2165927	2169037	AT4G24540.1	AGL24
BnaC01g04330D	GSBRNA2T00130775001	chrC01	2267066	2269501	AT4G34000.1	ABF3
BnaC01g06500D	GSBRNA2T00130521001	chrC01	3394508	3397130	AT2G46790.1	PRR9
BnaC01g06510D	GSBRNA2T00130520001	chrC01	3399239	3406280	AT3G12810.1	PIE1
BnaC01g06530D	GSBRNA2T00130518001	chrC01	3412876	3418215	AT3G12810.1	PIE1
BnaC01g08200D	GSBRNA2T00130286001	chrC01	4360682	4364186	AT4G30200.2	VEL1
BnaC01g08780D	GSBRNA2T00123012001	chrC01	4955887	4959259	AT2G19520.1	FVE
BnaC01g11150D	GSBRNA2T00107771001	chrC01	6943812	6946866	AT2G23080.1	CKA2
BnaC01g11460D	GSBRNA2T00107731001	chrC01	7096123	7102669	AT2G22540.1	SVP
BnaC01g12120D	GSBRNA2T00138080001	chrC01	7635704	7640890	AT5G04240.1	ELF6
BnaC01g14410D	GSBRNA2T00048686001	chrC01	9665390	9667383	AT2G23080.1	CKA2
BnaC01g14440D	GSBRNA2T00048692001	chrC01	9681168	9682526	AT3G57390.1	AGL18
BnaC01g15880D	GSBRNA2T00116168001	chrC01	10936246	10937721	AT1G69570.1	CDF3
BnaC01g16370D	GSBRNA2T00116099001	chrC01	11242770	11246056	AT4G24540.1	AGL24
BnaC01g17360D	GSBRNA2T00157603001	chrC01	11893630	11895398	AT3G33520.1	ARP6
BnaC01g17400D	GSBRNA2T00157596001	chrC01	11921350	11925268	AT3G57390.1	AGL18
BnaC01g21540D	GSBRNA2T00058999001	chrC01	15021989	15024952	AT4G16845.1	VRN2
BnaC01g21860D	GSBRNA2T00056540001	chrC01	15310987	15318061	AT4G16280.1	FCA
BnaC01g22100D	GSBRNA2T00056495001	chrC01	15518553	15520624	AT3G46640.1	LUX
BnaC01g24700D	GSBRNA2T00125771001	chrC01	19833289	19835056	AT3G46640.1	LUX
BnaC01g25750D	GSBRNA2T00126016001	chrC01	22001136	22003145	AT2G23080.1	CKA2
BnaC01g27560D	GSBRNA2T00050477001	chrC01	25202568	25205826	AT2G23080.1	CKA2
BnaC01g28210D	GSBRNA2T00082861001	chrC01	25865463	25867399	AT2G23080.1	CKA2
BnaC01g29070D	GSBRNA2T00117181001	chrC01	27249959	27255416	AT3G12810.1	PIE1
BnaC01g29290D	GSBRNA2T00117243001	chrC01	27644766	27651744	AT5G13480.1	FY
BnaC01g33680D	GSBRNA2T00101258001	chrC01	32886398	32889506	AT3G18990.1	VRN1
BnaC01g33900D	GSBRNA2T00101303001	chrC01	33083179	33085438	AT3G33520.1	ARP6
BnaC01g35220D	GSBRNA2T00040138001	chrC01	34495491	34499060	AT5G13480.1	FY
BnaC01g35600D	GSBRNA2T00018200001	chrC01	35046879	35047591	AT5G47640.1	HAP3B
BnaC01g35950D	GSBRNA2T00018156001	chrC01	35259165	35261958	AT1G04400.2	CRY2
BnaC01g36140D	GSBRNA2T00018127001	chrC01	35495466	35499272	AT3G15354.1	SPA3
BnaC01g36290D	GSBRNA2T00051803001	chrC01	35595103	35596035	AT2G33810.1	SPL
BnaC01g36660D	GSBRNA2T00051868001	chrC01	35835213	35838433	AT3G50000.1	CKA2
BnaC01g40810D	GSBRNA2T00034168001	chrC01_random	121104	124833	AT4G18130.1	PHYE
BnaC01g41050D	GSBRNA2T00004499001	chrC01_random	274667	276376	AT2G27550.1	TSF
BnaC01g41560D	GSBRNA2T00045547001	chrC01_random	751019	753114	AT3G04610.1	FLK
BnaC01g42310D	GSBRNA2T00014510001	chrC01_random	1465591	1466307	AT5G39660.1	CDF2
BnaC01g42660D	GSBRNA2T00022531001	chrC01_random	1836136	1838454	AT3G50000.1	CKA2
BnaC01g43000D	GSBRNA2T00028380001	chrC01_random	2312175	2312801	AT5G08330.1	CHE
BnaC01g43490D	GSBRNA2T00057732001	chrC01_random	2996727	3000297	AT3G02520.1	GRF7
BnaC01g43670D	GSBRNA2T00037564001	chrC01_random	3256431	3258507	AT3G21320.1	ELF3
BnaC01g43680D	GSBRNA2T00082029001	chrC01_random	3263120	3263908	AT3G47500.1	CDF3
BnaC01g43800D	GSBRNA2T00023319001	chrC01_random	3458625	3461309	AT3G19290.1	ABF4
BnaC01g44770D	GSBRNA2T00016431001	chrC01_random	4310420	4312697	AT3G10390.1	FLD
BnaC01g44800D	GSBRNA2T00016435001	chrC01_random	4331456	4333286	AT3G10390.1	FLD
BnaC01g44850D	GSBRNA2T00036312001	chrC01_random	4380278	4380964	AT1G25560.1	TEM1
BnaC02g00280D	GSBRNA2T00069022001	chrC02	99650	103626	AT4G36920.1	AP2
BnaC02g00320D	GSBRNA2T00069017001	chrC02	114366	115808	AT5G10450.1	GRF6
BnaC02g00490D	GSBRNA2T00068991001	chrC02	208562	212139	AT5G10140.1	FLC
BnaC02g00690D	GSBRNA2T00068966001	chrC02	282290	284609	AT3G33520.1	ARP6
BnaC02g01170D	GSBRNA2T00080768001	chrC02	496536	497481	AT5G08330.1	CHE
BnaC02g02900D	GSBRNA2T00078727001	chrC02	1320757	1321835	AT5G03840.1	TFL1
BnaC02g03470D	GSBRNA2T00017195001	chrC02	1653320	1656934	AT5G02810.1	PRR 7
BnaC02g04790D	GSBRNA2T00151903001	chrC02	2526638	2531119	AT5G13480.1	FY
BnaC02g06280D	GSBRNA2T00151724001	chrC02	3343865	3344830	AT5G15850.1	AtCOL1
BnaC02g08260D	GSBRNA2T00114734001	chrC02	4493015	4498815	AT3G12810.1	PIE1
BnaC02g08350D	GSBRNA2T00114722001	chrC02	4543179	4547598	AT2G33810.1	SPL
BnaC02g10000D	GSBRNA2T00091568001	chrC02	5637499	5639863	AT3G33520.1	ARP6
BnaC02g10840D	GSBRNA2T00114982001	chrC02	6275134	6277324	AT5G58230.1	MSI1
BnaC02g10920D	GSBRNA2T00114972001	chrC02	6343121	6348091	AT1G68050.1	FKF1
BnaC02g11400D	GSBRNA2T00114910001	chrC02	6688762	6690173	AT5G57660.1	ATCOL5
BnaC02g11520D	GSBRNA2T00074499001	chrC02	6825959	6829357	AT4G36920.1	AP2
BnaC02g11530D	GSBRNA2T00074497001	chrC02	6854103	6856576	AT5G57380.1	VIN3
BnaC02g14000D	GSBRNA2T00102380001	chrC02	9292105	9293499	AT2G33810.1	SPL
BnaC02g15480D	GSBRNA2T00153041001	chrC02	11044530	11045396	AT5G08330.1	CHE
BnaC02g15870D	GSBRNA2T00152974001	chrC02	11515721	11520386	AT5G51230.1	EMF2
BnaC02g18650D	GSBRNA2T00135275001	chrC02	14843806	14844837	AT1G68840.1	TEM2
BnaC02g18790D	GSBRNA2T00135296001	chrC02	15030313	15032937	AT4G34530.1	CIB1
BnaC02g19100D	GSBRNA2T00135341001	chrC02	15302873	15304461	AT2G33810.1	SPL
BnaC02g19450D	GSBRNA2T00040546001	chrC02	15847076	15848032	AT5G08330.1	CHE
BnaC02g19460D	GSBRNA2T00040547001	chrC02	15848410	15849288	AT5G08330.1	CHE
BnaC02g20640D	GSBRNA2T00064974001	chrC02	17190601	17198410	AT5G23260.1	AGL32
BnaC02g20970D	GSBRNA2T00137276001	chrC02	17626109	17627432	AT5G08330.1	CHE
BnaC02g21480D	GSBRNA2T00137194001	chrC02	18410374	18413632	AT4G36920.1	AP2
BnaC02g21500D	GSBRNA2T00137189001	chrC02	18446954	18454301	AT1G72630.1	ELF4
BnaC02g22470D	GSBRNA2T00082839001	chrC02	19535211	19536450	AT4G34530.1	CIB1
BnaC02g23820D	GSBRNA2T00077948001	chrC02	20907503	20909228	AT4G20370.1	TSF
BnaC02g24950D	GSBRNA2T00084358001	chrC02	22296150	22298788	AT1G78300.1	GRF2
BnaC02g25570D	GSBRNA2T00018693001	chrC02	22916547	22919022	AT5G42790.1	PAF1
BnaC02g27000D	GSBRNA2T00152536001	chrC02	24961583	24967009	AT4G02560.1	LD
BnaC02g27270D	GSBRNA2T00152582001	chrC02	25170587	25171828	AT5G13480.1	FY
BnaC02g28740D	GSBRNA2T00015545001	chrC02	27923628	27924074	AT1G47250.1	PAF2
BnaC02g28750D	GSBRNA2T00015544001	chrC02	27927571	27929473	AT1G47250.1	PAF2
BnaC02g29380D	GSBRNA2T00157353001	chrC02	29502685	29504733	AT5G67380.1	CKA1
BnaC02g31600D	GSBRNA2T00146889001	chrC02	33925397	33925837	AT5G16260.1	ELF9
BnaC02g31650D	GSBRNA2T00146883001	chrC02	33939275	33941061	AT3G50000.1	CKA2
BnaC02g32900D	GSBRNA2T00076952001	chrC02	35425269	35428933	AT3G48430.1	REF6
BnaC02g33400D	GSBRNA2T00069875001	chrC02	35853002	35853683	AT5G47640.1	HAP3B
BnaC02g35650D	GSBRNA2T00108406001	chrC02	38442235	38443284	AT3G25730.1	RAV1-like
BnaC02g38670D	GSBRNA2T00120665001	chrC02	41615197	41622098	AT4G34530.1	CIB1
BnaC02g39610D	GSBRNA2T00097038001	chrC02	42494135	42496780	AT5G27220.1	FRI
BnaC02g39650D	GSBRNA2T00028878001	chrC02	42512693	42521864	AT5G27220.1	FRI
BnaC02g40860D	GSBRNA2T00120260001	chrC02	43890826	43895435	AT5G13480.1	FY
BnaC02g41680D	GSBRNA2T00071717001	chrC02	44488835	44489983	AT5G08330.1	CHE
BnaC02g41690D	GSBRNA2T00071718001	chrC02	44491810	44494373	AT5G23260.1	AGL32
BnaC02g41760D	GSBRNA2T00071726001	chrC02	44519435	44525722	AT5G23150.1	HUA2
BnaC02g41820D	GSBRNA2T00071737001	chrC02	44653208	44654212	AT5G39660.1	CDF2
BnaC02g41870D	GSBRNA2T00086507001	chrC02	44718185	44722989	AT3G57390.1	AGL18
BnaC02g42220D	GSBRNA2T00082683001	chrC02	44909467	44910729	AT5G08330.1	CHE
BnaC02g42240D	GSBRNA2T00082681001	chrC02	44915695	44918385	AT5G23260.1	AGL32
BnaC02g43420D	GSBRNA2T00055849001	chrC02	45609919	45614199	AT5G65060.1	MAF3
BnaC02g43430D	GSBRNA2T00055848001	chrC02	45616533	45621243	AT2G23080.1	CKA2
BnaC02g43470D	GSBRNA2T00055843001	chrC02	45641023	45645061	AT5G65060.1	MAF3
BnaC02g43890D	GSBRNA2T00055779001	chrC02	45998579	45999487	AT3G47500.1	CDF3
BnaC02g44180D	GSBRNA2T00017542001	chrC02_random	43575	46669	AT4G36920.1	AP2
BnaC02g45250D	GSBRNA2T00030311001	chrC02_random	996695	998788	AT1G65480.1	FT
BnaC02g45540D	GSBRNA2T00014102001	chrC02_random	1260292	1263291	AT3G10390.1	FLD
BnaC02g46200D	GSBRNA2T00073552001	chrC02_random	2034214	2034864	AT3G18990.1	VRN1
BnaC02g47660D	GSBRNA2T00039662001	chrC02_random	3677489	3687274	AT2G23070.1	CKA2
BnaC02g47700D	GSBRNA2T00042353001	chrC02_random	3799091	3801128	AT3G46640.1	LUX
BnaC02g47760D	GSBRNA2T00072097001	chrC02_random	3839973	3842195	AT3G46640.1	LUX
BnaC02g48700D	GSBRNA2T00027410001	chrC02_random	4906064	4908268	AT5G24470.1	PRR5
BnaC03g00760D	GSBRNA2T00134216001	chrC03	379604	381473	AT1G26790.1	CDF3
BnaC03g01440D	GSBRNA2T00134290001	chrC03	673349	674628	AT5G03840.1	TFL1
BnaC03g01940D	GSBRNA2T00134354001	chrC03	929908	930642	AT3G46640.1	LUX
BnaC03g02500D	GSBRNA2T00134427001	chrC03	1196451	1199625	AT1G13260.1	RAV1
BnaC03g03480D	GSBRNA2T00134540001	chrC03	1706603	1707631	AT5G08330.1	CHE
BnaC03g03550D	GSBRNA2T00134547001	chrC03	1725437	1730201	AT5G13480.1	FY
BnaC03g03940D	GSBRNA2T00134592001	chrC03	1909311	1911634	AT3G33520.1	ARP6
BnaC03g04170D	GSBRNA2T00134620001	chrC03	2001058	2004665	AT5G10140.1	FLC
BnaC03g04330D	GSBRNA2T00134637001	chrC03	2069316	2071113	AT5G10450.1	GRF6
BnaC03g05900D	GSBRNA2T00140335001	chrC03	2863323	2867937	AT5G13480.1	FY
BnaC03g06030D	GSBRNA2T00140350001	chrC03	2936033	2937934	AT3G57390.1	AGL18
BnaC03g06580D	GSBRNA2T00140415001	chrC03	3160476	3163819	AT2G23080.1	CKA2
BnaC03g06880D	GSBRNA2T00140448001	chrC03	3281121	3284609	AT3G04610.1	FLK
BnaC03g07350D	GSBRNA2T00140505001	chrC03	3485695	3488288	AT3G57390.1	AGL18
BnaC03g08560D	GSBRNA2T00140652001	chrC03	4052938	4054811	AT5G17690.1	LHP1
BnaC03g09450D	GSBRNA2T00140758001	chrC03	4516849	4519568	AT3G50000.1	CKA2
BnaC03g10960D	GSBRNA2T00140947001	chrC03	5303959	5309047	AT3G12810.1	PIE1
BnaC03g11340D	GSBRNA2T00140994001	chrC03	5523482	5524670	AT5G39660.1	CDF2
BnaC03g12030D	GSBRNA2T00141080001	chrC03	5831297	5833162	AT3G33520.1	ARP6
BnaC03g12490D	GSBRNA2T00024853001	chrC03	6032263	6035501	AT5G58230.1	MSI1
BnaC03g12530D	GSBRNA2T00024857001	chrC03	6047610	6052714	AT1G68050.1	FKF1
BnaC03g12980D	GSBRNA2T00060706001	chrC03	6232590	6234927	AT5G57380.1	VIN3
BnaC03g15580D	GSBRNA2T00052606001	chrC03	7792034	7793098	AT2G32950.1	COP1
BnaC03g15810D	GSBRNA2T00052638001	chrC03	7967991	7971982	AT5G10140.1	FLC
BnaC03g15820D	GSBRNA2T00052639001	chrC03	7975817	7978935	AT3G57390.1	AGL18
BnaC03g16130D	GSBRNA2T00052682001	chrC03	8149599	8151810	AT4G00650.1	FRI
BnaC03g16290D	GSBRNA2T00082740001	chrC03	8259774	8261783	AT4G34530.1	CIB1
BnaC03g16360D	GSBRNA2T00082750001	chrC03	8313444	8316512	AT2G23070.1	CKA2
BnaC03g16490D	GSBRNA2T00082768001	chrC03	8378993	8380744	AT2G33810.1	SPL
BnaC03g16530D	GSBRNA2T00024568001	chrC03	8403312	8410062	AT5G10140.1	FLC
BnaC03g18300D	GSBRNA2T00132240001	chrC03	9388615	9389430	AT2G32950.1	COP1
BnaC03g18800D	GSBRNA2T00132295001	chrC03	9629272	9630113	AT2G33810.1	SPL
BnaC03g20500D	GSBRNA2T00132524001	chrC03	10865305	10867168	AT2G37060.1	HAP3B
BnaC03g20790D	GSBRNA2T00132564001	chrC03	11066043	11067231	AT3G47500.1	CDF3
BnaC03g20820D	GSBRNA2T00132568001	chrC03	11079041	11081106	AT3G33520.1	ARP6
BnaC03g21730D	GSBRNA2T00079089001	chrC03	11759347	11760703	AT2G38880.1	HAP3A
BnaC03g21850D	GSBRNA2T00079068001	chrC03	11857072	11871661	AT3G12810.1	PIE1
BnaC03g23470D	GSBRNA2T00019128001	chrC03	13089423	13092167	AT4G36920.1	AP2
BnaC03g23800D	GSBRNA2T00075510001	chrC03	13278702	13280761	AT4G09000.1	GRF1
BnaC03g23890D	GSBRNA2T00075498001	chrC03	13350975	13353675	AT2G23080.1	CKA2
BnaC03g23980D	GSBRNA2T00075486001	chrC03	13434693	13437573	AT3G10390.1	FLD
BnaC03g24480D	GSBRNA2T00079765001	chrC03	13735460	13738066	AT3G50000.1	CKA2
BnaC03g24710D	GSBRNA2T00101452001	chrC03	13880644	13883273	AT1G77300.1	EFS
BnaC03g25370D	GSBRNA2T00101541001	chrC03	14263936	14264817	AT5G08330.1	CHE
BnaC03g25530D	GSBRNA2T00101558001	chrC03	14340561	14345042	AT3G12810.1	PIE1
BnaC03g25540D	GSBRNA2T00101559001	chrC03	14345242	14348767	AT3G12810.1	PIE1
BnaC03g25720D	GSBRNA2T00101580001	chrC03	14429790	14433921	AT2G46340.1	SPA1
BnaC03g25870D	GSBRNA2T00101602001	chrC03	14523827	14525884	AT1G69570.1	CDF3
BnaC03g26210D	GSBRNA2T00101646001	chrC03	14821054	14821479	AT2G29950.1	ELF4
BnaC03g26480D	GSBRNA2T00101683001	chrC03	15074594	15077167	AT2G28550.1	TOE1
BnaC03g27870D	GSBRNA2T00055896001	chrC03	16266410	16267597	AT2G33810.1	SPL
BnaC03g31040D	GSBRNA2T00002432001	chrC03	18988932	18991371	AT4G36920.1	AP2
BnaC03g31910D	GSBRNA2T00153513001	chrC03	19630689	19632968	AT2G23080.1	CKA2
BnaC03g31970D	GSBRNA2T00153521001	chrC03	19661688	19665138	AT2G23080.1	CKA2
BnaC03g32670D	GSBRNA2T00153606001	chrC03	20021786	20027056	AT5G67380.1	CKA1
BnaC03g32910D	GSBRNA2T00153641001	chrC03	20155162	20156639	AT3G02380.1	AtCOL2
BnaC03g32980D	GSBRNA2T00153650001	chrC03	20192057	20193925	AT3G02520.1	GRF7
BnaC03g33790D	GSBRNA2T00071536001	chrC03	20562868	20566800	AT3G04610.1	FLK
BnaC03g34380D	GSBRNA2T00094178001	chrC03	20847361	20851745	AT2G23080.1	CKA2
BnaC03g36510D	GSBRNA2T00110496001	chrC03	22063463	22066561	AT3G10390.1	FLD
BnaC03g39380D	GSBRNA2T00123828001	chrC03	24331939	24332773	AT5G47640.1	HAP3B
BnaC03g39750D	GSBRNA2T00123894001	chrC03	24816554	24819500	AT2G46790.1	PRR9
BnaC03g39830D	GSBRNA2T00123902001	chrC03	24845714	24849958	AT2G18790.1	PHYB
BnaC03g40730D	GSBRNA2T00021429001	chrC03	25637811	25640279	AT3G18990.1	VRN1
BnaC03g41330D	GSBRNA2T00059894001	chrC03	26274700	26279302	AT3G12810.1	PIE1
BnaC03g41900D	GSBRNA2T00051995001	chrC03	26744237	26745704	AT1G68050.1	FKF1
BnaC03g42040D	GSBRNA2T00052020001	chrC03	26857020	26857640	AT3G47500.1	CDF3
BnaC03g42060D	GSBRNA2T00052025001	chrC03	26872339	26874601	AT3G21320.1	ELF3
BnaC03g45100D	GSBRNA2T00096646001	chrC03	30119364	30121384	AT1G47250.1	PAF2
BnaC03g45220D	GSBRNA2T00149966001	chrC03	30228273	30228902	AT5G47640.1	HAP3B
BnaC03g46630D	GSBRNA2T00150183001	chrC03	31614020	31614637	AT5G58230.1	MSI1
BnaC03g47080D	GSBRNA2T00047292001	chrC03	32072629	32076439	AT2G27550.1	TSF
BnaC03g48820D	GSBRNA2T00079331001	chrC03	33635611	33638707	AT4G36920.1	AP2
BnaC03g48970D	GSBRNA2T00079304001	chrC03	33753897	33755952	AT5G65430.1	GRF8
BnaC03g49240D	GSBRNA2T00079250001	chrC03	34174843	34177534	AT5G65080.1	MAF5
BnaC03g49330D	GSBRNA2T00079240001	chrC03	34244536	34249065	AT2G23080.1	CKA2
BnaC03g50310D	GSBRNA2T00141684001	chrC03	34944009	34950711	AT3G12810.1	PIE1
BnaC03g50810D	GSBRNA2T00141624001	chrC03	35230481	35231749	AT5G63470.1	HAP5C
BnaC03g51310D	GSBRNA2T00141516001	chrC03	35845990	35847691	AT3G47500.1	CDF3
BnaC03g52010D	GSBRNA2T00145736001	chrC03	36768816	36769757	AT5G62040.1	BFT
BnaC03g52270D	GSBRNA2T00145779001	chrC03	37104879	37106311	AT5G13480.1	FY
BnaC03g52880D	GSBRNA2T00145886001	chrC03	37924144	37927054	AT5G67380.1	CKA1
BnaC03g54810D	GSBRNA2T00000614001	chrC03	42826053	42828247	AT3G44460.1	AtbZIP67
BnaC03g55440D	GSBRNA2T00143966001	chrC03	44389410	44391319	AT3G50000.1	CKA2
BnaC03g55960D	GSBRNA2T00144070001	chrC03	45059785	45061371	AT3G33520.1	ARP6
BnaC03g56640D	GSBRNA2T00056989001	chrC03	45928897	45932271	AT3G57390.1	AGL18
BnaC03g57070D	GSBRNA2T00024785001	chrC03	46277653	46279420	AT5G08330.1	CHE
BnaC03g57490D	GSBRNA2T00024684001	chrC03	46822070	46823669	AT4G09000.1	GRF1
BnaC03g57540D	GSBRNA2T00050088001	chrC03	46858067	46860199	AT2G22540.1	SVP
BnaC03g57620D	GSBRNA2T00050076001	chrC03	46894343	46896908	AT2G33810.1	SPL
BnaC03g58500D	GSBRNA2T00059157001	chrC03	47801951	47803245	AT3G47500.1	CDF3
BnaC03g58930D	GSBRNA2T00076369001	chrC03	48170584	48171108	AT1G29160.1	CDF3
BnaC03g61270D	GSBRNA2T00096252001	chrC03	50283723	50286274	AT4G36920.1	AP2
BnaC03g62060D	GSBRNA2T00058462001	chrC03	51301490	51302936	AT1G69570.1	CDF3
BnaC03g62810D	GSBRNA2T00055928001	chrC03	52105218	52108054	AT2G23080.1	CKA2
BnaC03g62970D	GSBRNA2T00001530001	chrC03	52280688	52285871	AT2G22540.1	SVP
BnaC03g63020D	GSBRNA2T00001548001	chrC03	52354588	52357554	AT3G50000.1	CKA2
BnaC03g64560D	GSBRNA2T00037383001	chrC03	53893976	53895685	AT2G27550.1	TSF
BnaC03g65970D	GSBRNA2T00095641001	chrC03	55673438	55674632	AT4G34530.1	CIB1
BnaC03g67870D	GSBRNA2T00062120001	chrC03	57480155	57482886	AT1G77300.1	EFS
BnaC03g68030D	GSBRNA2T00116255001	chrC03	57628945	57631885	AT4G30200.2	VEL1
BnaC03g68710D	GSBRNA2T00116367001	chrC03	58416170	58416790	AT5G16260.1	ELF9
BnaC03g69370D	GSBRNA2T00033116001	chrC03	59078520	59081674	AT5G67380.1	CKA1
BnaC03g69920D	GSBRNA2T00033024001	chrC03	59628090	59631822	AT5G42790.1	PAF1
BnaC03g71020D	GSBRNA2T00032462001	chrC03	60497499	60502760	AT3G33520.1	ARP6
BnaC03g71880D	GSBRNA2T00062787001	chrC03_random	404353	404835	AT1G13260.1	RAV1
BnaC03g72210D	GSBRNA2T00036272001	chrC03_random	576240	577536	AT2G23070.1	CKA2
BnaC03g72230D	GSBRNA2T00036376001	chrC03_random	589899	594901	AT5G04240.1	ELF6
BnaC03g72320D	GSBRNA2T00028505001	chrC03_random	650557	651249	AT2G40080.1	ELF4
BnaC03g72370D	GSBRNA2T00097754001	chrC03_random	674113	675424	AT1G13260.1	RAV1
BnaC03g72890D	GSBRNA2T00028475001	chrC03_random	1095024	1106368	AT4G24540.1	AGL24
BnaC03g73810D	GSBRNA2T00034664001	chrC03_random	1811021	1813439	AT3G33520.1	ARP6
BnaC03g74580D	GSBRNA2T00027475001	chrC03_random	2564737	2566097	AT4G30200.2	VEL1
BnaC03g75050D	GSBRNA2T00065321001	chrC03_random	3294796	3296614	AT3G33520.1	ARP6
BnaC03g75260D	GSBRNA2T00020225001	chrC03_random	3656137	3658871	AT5G67380.1	CKA1
BnaC03g76640D	GSBRNA2T00008502001	chrC03_random	5225712	5227337	AT4G34530.1	CIB1
BnaC03g76870D	GSBRNA2T00035884001	chrC03_random	5399138	5400468	AT4G35900.1	FD
BnaC03g77730D	GSBRNA2T00003011001	chrC03_random	6121728	6122747	AT1G51120.1	RAV1-like
BnaC03g77910D	GSBRNA2T00008218001	chrC03_random	6242320	6243157	AT1G69570.1	CDF3
BnaC04g00090D	GSBRNA2T00008339001	chrC04	31312	31998	AT5G47640.1	HAP3B
BnaC04g00420D	GSBRNA2T00064718001	chrC04	356817	360890	AT2G33810.1	SPL
BnaC04g00580D	GSBRNA2T00073199001	chrC04	470586	471751	AT1G13260.1	RAV1
BnaC04g00640D	GSBRNA2T00073193001	chrC04	492312	494226	AT2G46790.1	PRR9
BnaC04g00830D	GSBRNA2T00073166001	chrC04	687207	688906	AT3G47500.1	CDF3
BnaC04g01130D	GSBRNA2T00074049001	chrC04	916359	921069	AT2G46340.1	SPA1
BnaC04g02240D	GSBRNA2T00091682001	chrC04	1718364	1719012	AT5G38480.1	GRF3
BnaC04g02260D	GSBRNA2T00091684001	chrC04	1742829	1744781	AT2G23080.1	CKA2
BnaC04g02520D	GSBRNA2T00010840001	chrC04	1886612	1888780	AT2G33810.1	SPL
BnaC04g02590D	GSBRNA2T00010830001	chrC04	1919935	1923145	AT4G34530.1	CIB1
BnaC04g02920D	GSBRNA2T00002277001	chrC04	2066379	2078825	AT2G43410.1	FPA
BnaC04g03080D	GSBRNA2T00002257001	chrC04	2249062	2251325	AT3G50000.1	CKA2
BnaC04g03390D	GSBRNA2T00002220001	chrC04	2408832	2411322	AT1G77300.1	EFS
BnaC04g03900D	GSBRNA2T00006180001	chrC04	2889909	2894089	AT3G12810.1	PIE1
BnaC04g04380D	GSBRNA2T00006114001	chrC04	3253568	3255628	AT3G57390.1	AGL18
BnaC04g04390D	GSBRNA2T00006113001	chrC04	3258509	3260641	AT3G57390.1	AGL18
BnaC04g04400D	GSBRNA2T00006103001	chrC04	3303674	3304751	AT5G08330.1	CHE
BnaC04g04740D	GSBRNA2T00006063001	chrC04	3466842	3468613	AT5G67380.1	CKA1
BnaC04g05290D	GSBRNA2T00012626001	chrC04	3745290	3745860	AT2G40080.1	ELF4
BnaC04g05320D	GSBRNA2T00012622001	chrC04	3763927	3764872	AT2G40080.1	ELF4
BnaC04g05950D	GSBRNA2T00012527001	chrC04	4210244	4211935	AT3G12810.1	PIE1
BnaC04g06460D	GSBRNA2T00152869001	chrC04	4684509	4688618	AT3G48430.1	REF6
BnaC04g06490D	GSBRNA2T00152863001	chrC04	4728865	4731076	AT2G38880.1	HAP3A
BnaC04g07770D	GSBRNA2T00152673001	chrC04	5770965	5773691	AT3G33520.1	ARP6
BnaC04g07800D	GSBRNA2T00152666001	chrC04	5804226	5805383	AT3G47500.1	CDF3
BnaC04g08790D	GSBRNA2T00053875001	chrC04	6569284	6571980	AT4G16845.1	VRN2
BnaC04g09030D	GSBRNA2T00141156001	chrC04	6774985	6777669	AT3G44460.1	AtbZIP67
BnaC04g09240D	GSBRNA2T00141192001	chrC04	6973012	6974785	AT1G68840.1	TEM2
BnaC04g09410D	GSBRNA2T00141222001	chrC04	7159032	7161712	AT2G35670.1	FIE2
BnaC04g09420D	GSBRNA2T00141228001	chrC04	7215887	7217384	AT4G16845.1	VRN2
BnaC04g11750D	GSBRNA2T00061144001	chrC04	9211121	9215359	AT2G32950.1	COP1
BnaC04g14850D	GSBRNA2T00113342001	chrC04	12435074	12437644	AT1G65480.1	FT
BnaC04g15640D	GSBRNA2T00090011001	chrC04	13521651	13524359	AT2G28550.1	TOE1
BnaC04g16750D	GSBRNA2T00148290001	chrC04	14756411	14757958	AT2G27550.1	TSF
BnaC04g17110D	GSBRNA2T00148350001	chrC04	15143468	15145509	AT1G47250.1	PAF2
BnaC04g17530D	GSBRNA2T00148463001	chrC04	16042198	16043853	AT5G42790.1	PAF1
BnaC04g17630D	GSBRNA2T00148479001	chrC04	16147885	16149515	AT5G42910.1	AtbZIP15
BnaC04g20970D	GSBRNA2T00156764001	chrC04	21923957	21931368	AT5G23150.1	HUA2
BnaC04g21960D	GSBRNA2T00074919001	chrC04	23096420	23101845	AT4G24540.1	AGL24
BnaC04g22680D	GSBRNA2T00082710001	chrC04	23671036	23673063	AT2G23080.1	CKA2
BnaC04g22710D	GSBRNA2T00082714001	chrC04	23711496	23712478	AT2G23080.1	CKA2
BnaC04g23360D	GSBRNA2T00110351001	chrC04	24466814	24474692	AT4G24540.1	AGL24
BnaC04g23930D	GSBRNA2T00087887001	chrC04	25001142	25003655	AT2G33810.1	SPL
BnaC04g24260D	GSBRNA2T00047035001	chrC04	25270463	25272216	AT3G57390.1	AGL18
BnaC04g24300D	GSBRNA2T00047030001	chrC04	25301912	25305803	AT3G12810.1	PIE1
BnaC04g24820D	GSBRNA2T00087280001	chrC04	25708019	25709771	AT3G56850.1	AREB3
BnaC04g26350D	GSBRNA2T00071086001	chrC04	27749281	27751426	AT5G23260.1	AGL32
BnaC04g26460D	GSBRNA2T00071064001	chrC04	27874625	27877297	AT2G23080.1	CKA2
BnaC04g27010D	GSBRNA2T00046318001	chrC04	28248591	28250954	AT3G33520.1	ARP6
BnaC04g30930D	GSBRNA2T00112729001	chrC04	32804386	32806072	AT5G38480.1	GRF3
BnaC04g31720D	GSBRNA2T00044902001	chrC04	33486997	33489050	AT5G39660.1	CDF2
BnaC04g35060D	GSBRNA2T00149752001	chrC04	36478652	36481951	AT2G22540.1	SVP
BnaC04g35150D	GSBRNA2T00149769001	chrC04	36582700	36585842	AT2G22540.1	SVP
BnaC04g35630D	GSBRNA2T00149852001	chrC04	37136228	37139368	AT2G23070.1	CKA2
BnaC04g35880D	GSBRNA2T00149901001	chrC04	37428287	37432998	AT2G23380.1	CLF
BnaC04g37230D	GSBRNA2T00060034001	chrC04	38676219	38677485	AT2G24790.1	AtCOL3
BnaC04g38540D	GSBRNA2T00127632001	chrC04	39731168	39733341	AT1G47250.1	PAF2
BnaC04g39220D	GSBRNA2T00127731001	chrC04	40249441	40250303	AT2G27550.1	TSF
BnaC04g39790D	GSBRNA2T00127821001	chrC04	40767230	40768796	AT1G69570.1	CDF3
BnaC04g40070D	GSBRNA2T00127875001	chrC04	41070414	41072132	AT5G62430.1	CDF1
BnaC04g41660D	GSBRNA2T00105053001	chrC04	42414604	42417917	AT2G23080.1	CKA2
BnaC04g44230D	GSBRNA2T00020688001	chrC04	44354526	44355241	AT2G33810.1	SPL
BnaC04g44370D	GSBRNA2T00062886001	chrC04	44404006	44404518	AT2G34140.1	CDF3
BnaC04g44910D	GSBRNA2T00051424001	chrC04	44735959	44738539	AT3G48430.1	REF6
BnaC04g45310D	GSBRNA2T00155350001	chrC04	45033138	45035097	AT2G34140.1	CDF3
BnaC04g45360D	GSBRNA2T00155345001	chrC04	45058555	45060059	AT3G33520.1	ARP6
BnaC04g48100D	GSBRNA2T00084685001	chrC04	46883729	46888143	AT3G33520.1	ARP6
BnaC04g48150D	GSBRNA2T00084692001	chrC04	46915351	46917939	AT2G33810.1	SPL
BnaC04g48640D	GSBRNA2T00084759001	chrC04	47155635	47158911	AT3G10390.1	FLD
BnaC04g50370D	GSBRNA2T00037309001	chrC04	48074887	48078345	AT4G24540.1	AGL24
BnaC04g50670D	GSBRNA2T00037275001	chrC04	48191109	48202928	AT3G12810.1	PIE1
BnaC04g50710D	GSBRNA2T00037271001	chrC04	48249821	48251529	AT5G67380.1	CKA1
BnaC04g50910D	GSBRNA2T00037250001	chrC04	48326530	48327612	AT1G69570.1	CDF3
BnaC04g51560D	GSBRNA2T00038190001	chrC04	48833525	48834439	AT1G68840.1	TEM2
BnaC04g51630D	GSBRNA2T00038197001	chrC04	48862121	48867024	AT2G46790.1	PRR9
BnaC04g52240D	GSBRNA2T00011219001	chrC04_random	292972	293718	AT3G46640.1	LUX
BnaC04g52290D	GSBRNA2T00011228001	chrC04_random	320757	322244	AT2G41070.1	AREB3
BnaC04g52890D	GSBRNA2T00011139001	chrC04_random	591770	595227	AT3G10390.1	FLD
BnaC04g53290D	GSBRNA2T00083011001	chrC04_random	867297	870707	AT4G24540.1	AGL24
BnaC04g56280D	GSBRNA2T00036357001	chrC04_random	3971855	3978126	AT1G77300.1	EFS
BnaC04g56320D	GSBRNA2T00096513001	chrC04_random	4015347	4018206	AT2G46790.1	PRR9
BnaC04g56730D	GSBRNA2T00034255001	chrC04_random	4305449	4306241	AT2G40080.1	ELF4
BnaC04g56840D	GSBRNA2T00022389001	chrC04_random	4365415	4366904	AT2G41070.1	AREB3
BnaC05g00870D	GSBRNA2T00085396001	chrC05	451954	453932	AT1G13260.1	RAV1
BnaC05g01310D	GSBRNA2T00085449001	chrC05	686198	689713	AT2G23380.1	CLF
BnaC05g02020D	GSBRNA2T00002705001	chrC05	979393	982702	AT2G23070.1	CKA2
BnaC05g02200D	GSBRNA2T00002726001	chrC05	1056732	1057680	AT5G44080.1	AREB3
BnaC05g02520D	GSBRNA2T00002759001	chrC05	1230796	1234120	AT1G04400.2	CRY2
BnaC05g03140D	GSBRNA2T00002828001	chrC05	1500005	1504217	AT3G12810.1	PIE1
BnaC05g03160D	GSBRNA2T00093190001	chrC05	1529112	1536092	AT3G12810.1	PIE1
BnaC05g05320D	GSBRNA2T00100685001	chrC05	2588274	2589614	AT1G69570.1	CDF3
BnaC05g06240D	GSBRNA2T00100567001	chrC05	3061661	3071413	AT3G12810.1	PIE1
BnaC05g06250D	GSBRNA2T00100566001	chrC05	3072836	3078277	AT5G04240.1	ELF6
BnaC05g06520D	GSBRNA2T00100534001	chrC05	3224198	3228539	AT1G08970.1	HAP5C
BnaC05g06570D	GSBRNA2T00100529001	chrC05	3248229	3248627	AT3G53340.1	HAP3B
BnaC05g07320D	GSBRNA2T00100420001	chrC05	3656804	3660879	AT2G23080.1	CKA2
BnaC05g07560D	GSBRNA2T00100390001	chrC05	3805065	3807554	AT3G50000.1	CKA2
BnaC05g07820D	GSBRNA2T00039591001	chrC05	3967894	3969949	AT4G34530.1	CIB1
BnaC05g07950D	GSBRNA2T00065023001	chrC05	4047866	4049720	AT4G34530.1	CIB1
BnaC05g12270D	GSBRNA2T00054200001	chrC05	7108514	7110168	AT4G36920.1	AP2
BnaC05g13570D	GSBRNA2T00089266001	chrC05	7841338	7846372	AT1G17455.1	ELF4
BnaC05g16580D	GSBRNA2T00119192001	chrC05	10373397	10374161	AT1G69570.1	CDF3
BnaC05g17440D	GSBRNA2T00065562001	chrC05	11164321	11166482	AT5G38480.1	GRF3
BnaC05g18020D	GSBRNA2T00119480001	chrC05	11778931	11784461	AT1G22770.1	GI
BnaC05g20320D	GSBRNA2T00142458001	chrC05	13714717	13716220	AT4G09000.1	GRF1
BnaC05g20560D	GSBRNA2T00142419001	chrC05	13975457	13976740	AT1G25560.1	TEM1
BnaC05g21200D	GSBRNA2T00142288001	chrC05	14940965	14943819	AT3G57390.1	AGL18
BnaC05g21270D	GSBRNA2T00142280001	chrC05	14983160	14985111	AT2G33810.1	SPL
BnaC05g21280D	GSBRNA2T00142279001	chrC05	14985628	14987198	AT2G33810.1	SPL
BnaC05g22130D	GSBRNA2T00108468001	chrC05	15999676	16000398	AT1G29160.1	CDF3
BnaC05g23780D	GSBRNA2T00031136001	chrC05	17822445	17826395	AT3G48430.1	REF6
BnaC05g24380D	GSBRNA2T00019259001	chrC05	18760033	18761546	AT5G39660.1	CDF2
BnaC05g26340D	GSBRNA2T00013153001	chrC05	22348141	22350766	AT2G23080.1	CKA2
BnaC05g27060D	GSBRNA2T00058893001	chrC05	23698651	23699688	AT1G51120.1	RAV1-like
BnaC05g27100D	GSBRNA2T00058888001	chrC05	23739541	23745980	AT4G36920.1	AP2
BnaC05g27930D	GSBRNA2T00106413001	chrC05	25379277	25381183	AT1G35160.1	GRF4
BnaC05g31430D	GSBRNA2T00122353001	chrC05	30741585	30744198	AT4G36920.1	AP2
BnaC05g32520D	GSBRNA2T00026898001	chrC05	32091309	32096414	AT3G12810.1	PIE1
BnaC05g33570D	GSBRNA2T00107454001	chrC05	33061771	33064585	AT1G49720.1	ABF1
BnaC05g33730D	GSBRNA2T00107499001	chrC05	33244848	33250852	AT3G12810.1	PIE1
BnaC05g34060D	GSBRNA2T00107563001	chrC05	33574236	33576921	AT3G18990.1	VRN1
BnaC05g34300D	GSBRNA2T00107591001	chrC05	33696597	33699015	AT3G33520.1	ARP6
BnaC05g36390D	GSBRNA2T00101878001	chrC05	35604584	35609052	AT2G18790.1	PHYB
BnaC05g36490D	GSBRNA2T00101896001	chrC05	35753144	35756932	AT2G46790.1	PRR9
BnaC05g37390D	GSBRNA2T00044690001	chrC05	36433213	36433710	AT5G47640.1	HAP3B
BnaC05g38270D	GSBRNA2T00106201001	chrC05	37058879	37062179	AT3G15354.1	SPA3
BnaC05g38350D	GSBRNA2T00106189001	chrC05	37107896	37108713	AT2G33810.1	SPL
BnaC05g38860D	GSBRNA2T00106119001	chrC05	37450859	37453750	AT3G50000.1	CKA2
BnaC05g40980D	GSBRNA2T00111153001	chrC05	38935525	38937391	AT3G33520.1	ARP6
BnaC05g41640D	GSBRNA2T00111064001	chrC05	39284968	39287221	AT1G25560.1	TEM1
BnaC05g42310D	GSBRNA2T00110982001	chrC05	39754815	39755669	AT3G46640.1	LUX
BnaC05g44630D	GSBRNA2T00039003001	chrC05	40833278	40835805	AT4G34530.1	CIB1
BnaC05g45420D	GSBRNA2T00120084001	chrC05	41331419	41338997	AT3G12810.1	PIE1
BnaC05g46010D	GSBRNA2T00120008001	chrC05	41669418	41672328	AT2G23080.1	CKA2
BnaC05g46740D	GSBRNA2T00073915001	chrC05	42077421	42080618	AT5G67380.1	CKA1
BnaC05g46840D	GSBRNA2T00073902001	chrC05	42109699	42115891	AT5G27220.1	FRI
BnaC05g48320D	GSBRNA2T00076267001	chrC05	42836637	42840706	AT3G57390.1	AGL18
BnaC05g48590D	GSBRNA2T00076300001	chrC05	43015087	43020684	AT5G67380.1	CKA1
BnaC05g49460D	GSBRNA2T00036015001	chrC05_random	324346	324534	AT5G58230.1	MSI1
BnaC05g49470D	GSBRNA2T00036016001	chrC05_random	324661	325479	AT5G58230.1	MSI1
BnaC05g50040D	GSBRNA2T00044041001	chrC05_random	739807	741353	AT4G34530.1	CIB1
BnaC05g50100D	GSBRNA2T00030034001	chrC05_random	764331	767958	AT2G23080.1	CKA2
BnaC05g50120D	GSBRNA2T00030036001	chrC05_random	783915	785969	AT1G18100.1	TSF
BnaC05g50970D	GSBRNA2T00097409001	chrC05_random	1850228	1858642	AT1G26790.1	CDF3
BnaC05g50980D	GSBRNA2T00097410001	chrC05_random	1865679	1866893	AT1G26790.1	CDF3
BnaC05g51360D	GSBRNA2T00025755001	chrC05_random	2373442	2375479	AT3G18990.1	VRN1
BnaC05g51390D	GSBRNA2T00048280001	chrC05_random	2451404	2452249	AT1G51120.1	RAV1-like
BnaC06g00420D	GSBRNA2T00095159001	chrC06	667000	668818	AT1G45249.1	ABF2
BnaC06g01430D	GSBRNA2T00013286001	chrC06	2154053	2155889	AT4G34530.1	CIB1
BnaC06g02640D	GSBRNA2T00039036001	chrC06	3442534	3443805	AT1G49720.1	ABF1
BnaC06g03690D	GSBRNA2T00063364001	chrC06	4363793	4364812	AT1G51120.1	RAV1-like
BnaC06g03900D	GSBRNA2T00063330001	chrC06	4548364	4549365	AT1G50680.1	RAV1-like
BnaC06g03910D	GSBRNA2T00063329001	chrC06	4557613	4558644	AT1G51120.1	RAV1-like
BnaC06g04340D	GSBRNA2T00029169001	chrC06	4988910	4990817	AT1G51120.1	RAV1-like
BnaC06g06380D	GSBRNA2T00081404001	chrC06	6877369	6880666	AT3G50000.1	CKA2
BnaC06g06620D	GSBRNA2T00062317001	chrC06	7176883	7182331	AT1G47250.1	PAF2
BnaC06g07730D	GSBRNA2T00085520001	chrC06	8315907	8318187	AT2G23080.1	CKA2
BnaC06g07750D	GSBRNA2T00085522001	chrC06	8331202	8332907	AT3G50000.1	CKA2
BnaC06g08380D	GSBRNA2T00115551001	chrC06	9342975	9345926	AT3G02520.1	GRF7
BnaC06g08720D	GSBRNA2T00146949001	chrC06	10275145	10277092	AT3G33520.1	ARP6
BnaC06g08980D	GSBRNA2T00147000001	chrC06	10643915	10644463	AT1G69570.1	CDF3
BnaC06g10070D	GSBRNA2T00096923001	chrC06	12052490	12054583	AT2G33810.1	SPL
BnaC06g10100D	GSBRNA2T00096918001	chrC06	12097791	12100958	AT1G53090.1	SPA4
BnaC06g10110D	GSBRNA2T00096915001	chrC06	12114902	12118313	AT2G23070.1	CKA2
BnaC06g11890D	GSBRNA2T00122506001	chrC06	14042468	14046220	AT5G35840.1	PHYC
BnaC06g12530D	GSBRNA2T00063212001	chrC06	14973400	14974977	AT5G39660.1	CDF2
BnaC06g12590D	GSBRNA2T00063187001	chrC06	15163560	15166457	AT2G23080.1	CKA2
BnaC06g15540D	GSBRNA2T00124534001	chrC06	18279726	18283754	AT3G54990.1	SMZ
BnaC06g16100D	GSBRNA2T00105760001	chrC06	19095366	19097874	AT4G34530.1	CIB1
BnaC06g16200D	GSBRNA2T00105779001	chrC06	19172101	19173360	AT2G33810.1	SPL
BnaC06g16910D	GSBRNA2T00105875001	chrC06	19705951	19709351	AT4G24540.1	AGL24
BnaC06g17070D	GSBRNA2T00105897001	chrC06	19788645	19792163	AT3G10390.1	FLD
BnaC06g17560D	GSBRNA2T00105978001	chrC06	20161161	20163974	AT3G50000.1	CKA2
BnaC06g17610D	GSBRNA2T00105984001	chrC06	20191156	20193591	AT1G77300.1	EFS
BnaC06g18780D	GSBRNA2T00132154001	chrC06	21153428	21160641	AT5G23150.1	HUA2
BnaC06g19970D	GSBRNA2T00131975001	chrC06	22061888	22064208	AT5G42790.1	PAF1
BnaC06g20480D	GSBRNA2T00131882001	chrC06	22516545	22518276	AT1G78300.1	GRF2
BnaC06g23500D	GSBRNA2T00049069001	chrC06	25314704	25318994	AT3G50000.1	CKA2
BnaC06g24150D	GSBRNA2T00049173001	chrC06	25941068	25941775	AT1G72630.1	ELF4
BnaC06g25500D	GSBRNA2T00118005001	chrC06	27150009	27154346	AT3G57390.1	AGL18
BnaC06g27090D	GSBRNA2T00067517001	chrC06	28552966	28555216	AT4G20370.1	TSF
BnaC06g27720D	GSBRNA2T00060162001	chrC06	29110288	29112518	AT2G23080.1	CKA2
BnaC06g27940D	GSBRNA2T00112877001	chrC06	29268003	29269154	AT5G08330.1	CHE
BnaC06g28080D	GSBRNA2T00112897001	chrC06	29376975	29378575	AT1G69570.1	CDF3
BnaC06g28610D	GSBRNA2T00112980001	chrC06	29781843	29785588	AT5G67380.1	CKA1
BnaC06g29840D	GSBRNA2T00054859001	chrC06	30634383	30637014	AT4G34530.1	CIB1
BnaC06g29980D	GSBRNA2T00054833001	chrC06	30792050	30795879	AT3G57390.1	AGL18
BnaC06g32610D	GSBRNA2T00103202001	chrC06	32728555	32731443	AT2G23070.1	CKA2
BnaC06g32640D	GSBRNA2T00103205001	chrC06	32747584	32750270	AT4G24540.1	AGL24
BnaC06g33040D	GSBRNA2T00103257001	chrC06	33056087	33057157	AT5G08330.1	CHE
BnaC06g33780D	GSBRNA2T00103355001	chrC06	33547655	33548898	AT1G72630.1	ELF4
BnaC06g34490D	GSBRNA2T00103440001	chrC06	33956706	33958473	AT3G50000.1	CKA2
BnaC06g34680D	GSBRNA2T00103461001	chrC06	34031956	34033554	AT4G34530.1	CIB1
BnaC06g35250D	GSBRNA2T00103529001	chrC06	34302017	34305204	AT5G67380.1	CKA1
BnaC06g37380D	GSBRNA2T00147796001	chrC06	35418992	35421012	AT2G23080.1	CKA2
BnaC06g37430D	GSBRNA2T00147801001	chrC06	35462347	35466616	AT2G33810.1	SPL
BnaC06g37540D	GSBRNA2T00147812001	chrC06	35510189	35512505	AT1G77300.1	EFS
BnaC06g38010D	GSBRNA2T00147879001	chrC06	35772518	35779988	AT1G77300.1	EFS
BnaC06g38720D	GSBRNA2T00147968001	chrC06	36198115	36199487	AT5G65430.1	GRF8
BnaC06g38800D	GSBRNA2T00147978001	chrC06	36244755	36246940	AT1G78300.1	GRF2
BnaC06g39610D	GSBRNA2T00148072001	chrC06	36673530	36676200	AT5G42790.1	PAF1
BnaC06g40040D	GSBRNA2T00148122001	chrC06	36875692	36878546	AT4G36920.1	AP2
BnaC06g40770D	GSBRNA2T00025976001	chrC06_random	80166	81908	AT4G36920.1	AP2
BnaC06g41420D	GSBRNA2T00030719001	chrC06_random	677190	678148	AT2G33810.1	SPL
BnaC06g41960D	GSBRNA2T00004260001	chrC06_random	1290222	1292239	AT1G47250.1	PAF2
BnaC06g42050D	GSBRNA2T00040820001	chrC06_random	1398080	1399721	AT4G34530.1	CIB1
BnaC06g43390D	GSBRNA2T00067590001	chrC06_random	2820700	2822645	AT1G69570.1	CDF3
BnaC07g01640D	GSBRNA2T00137967001	chrC07	2338027	2341010	AT2G19520.1	FVE
BnaC07g01700D	GSBRNA2T00137956001	chrC07	2410092	2412938	AT2G19520.1	FVE
BnaC07g02620D	GSBRNA2T00137783001	chrC07	3533050	3535453	AT2G18915.2	LKP2
BnaC07g02630D	GSBRNA2T00137782001	chrC07	3537154	3540097	AT2G18915.2	LKP2
BnaC07g03450D	GSBRNA2T00029080001	chrC07	4640225	4642246	AT4G34530.1	CIB1
BnaC07g04250D	GSBRNA2T00002484001	chrC07	6252546	6254454	AT1G47250.1	PAF2
BnaC07g04450D	GSBRNA2T00144676001	chrC07	6920107	6930687	AT3G57390.1	AGL18
BnaC07g07230D	GSBRNA2T00068101001	chrC07	11590772	11593154	AT3G24440.1	VRN5
BnaC07g07840D	GSBRNA2T00142647001	chrC07	12508345	12510406	AT4G34530.1	CIB1
BnaC07g08800D	GSBRNA2T00105711001	chrC07	13813997	13816281	AT4G18130.1	PHYE
BnaC07g11300D	GSBRNA2T00117397001	chrC07	16990481	16992682	AT2G22540.1	SVP
BnaC07g11380D	GSBRNA2T00117406001	chrC07	17019145	17021004	AT2G33810.1	SPL
BnaC07g11390D	GSBRNA2T00117407001	chrC07	17021308	17024043	AT2G33810.1	SPL
BnaC07g12270D	GSBRNA2T00012709001	chrC07	17796283	17797761	AT4G09000.1	GRF1
BnaC07g13790D	GSBRNA2T00110103001	chrC07	19508018	19509635	AT1G78300.1	GRF2
BnaC07g13820D	GSBRNA2T00110098001	chrC07	19599968	19601784	AT5G38480.1	GRF3
BnaC07g14150D	GSBRNA2T00110047001	chrC07	19943199	19945282	AT5G47640.1	HAP3B
BnaC07g14530D	GSBRNA2T00109991001	chrC07	20361797	20362579	AT1G69570.1	CDF3
BnaC07g15060D	GSBRNA2T00050577001	chrC07	21024854	21026666	AT2G23080.1	CKA2
BnaC07g15760D	GSBRNA2T00070509001	chrC07	21696310	21698013	AT3G12810.1	PIE1
BnaC07g16190D	GSBRNA2T00070444001	chrC07	22176725	22179170	AT5G67180.1	TOE3
BnaC07g16430D	GSBRNA2T00070399001	chrC07	22422653	22423312	AT3G47500.1	CDF3
BnaC07g16550D	GSBRNA2T00046168001	chrC07	22509766	22513714	AT3G12810.1	PIE1
BnaC07g17030D	GSBRNA2T00088261001	chrC07	23058708	23062406	AT2G33810.1	SPL
BnaC07g17170D	GSBRNA2T00158080001	chrC07	23241004	23246053	AT3G12810.1	PIE1
BnaC07g18410D	GSBRNA2T00067038001	chrC07	25085313	25088032	AT2G23070.1	CKA2
BnaC07g19700D	GSBRNA2T00128719001	chrC07	26503154	26506525	AT3G48430.1	REF6
BnaC07g20390D	GSBRNA2T00128824001	chrC07	27011240	27011748	AT5G47640.1	HAP3B
BnaC07g20410D	GSBRNA2T00128826001	chrC07	27026011	27028908	AT2G38880.1	HAP3A
BnaC07g20800D	GSBRNA2T00128893001	chrC07	27405431	27408735	AT2G23070.1	CKA2
BnaC07g22090D	GSBRNA2T00115328001	chrC07	28598122	28600488	AT3G04610.1	FLK
BnaC07g22490D	GSBRNA2T00115275001	chrC07	28923303	28925702	AT2G22540.1	SVP
BnaC07g22870D	GSBRNA2T00139176001	chrC07	29486217	29487654	AT3G25730.1	RAV1-like
BnaC07g26580D	GSBRNA2T00143019001	chrC07	32471650	32474319	AT4G34530.1	CIB1
BnaC07g27720D	GSBRNA2T00133823001	chrC07	33126609	33129250	AT2G23080.1	CKA2
BnaC07g27750D	GSBRNA2T00133818001	chrC07	33157127	33161007	AT5G27220.1	FRI
BnaC07g28590D	GSBRNA2T00133712001	chrC07	33677238	33679936	AT2G23080.1	CKA2
BnaC07g29680D	GSBRNA2T00133568001	chrC07	34345634	34347548	AT5G24930.1	AtCOL4
BnaC07g29710D	GSBRNA2T00133564001	chrC07	34414324	34418821	AT1G04400.2	CRY2
BnaC07g29960D	GSBRNA2T00133531001	chrC07	34630644	34633369	AT5G24470.1	PRR5
BnaC07g30810D	GSBRNA2T00133425001	chrC07	35110718	35115602	AT5G13480.1	FY
BnaC07g31770D	GSBRNA2T00021458001	chrC07	35736314	35737057	AT1G26790.1	CDF3
BnaC07g32150D	GSBRNA2T00041741001	chrC07	35968533	35970117	AT1G47250.1	PAF2
BnaC07g32880D	GSBRNA2T00041830001	chrC07	36276800	36277522	AT1G69570.1	CDF3
BnaC07g33310D	GSBRNA2T00031408001	chrC07	36579971	36583574	AT5G13480.1	FY
BnaC07g33430D	GSBRNA2T00031391001	chrC07	36677022	36680534	AT2G46790.1	PRR9
BnaC07g35230D	GSBRNA2T00112561001	chrC07	37689844	37690504	AT5G13480.1	FY
BnaC07g35700D	GSBRNA2T00112622001	chrC07	38013168	38016022	AT3G50000.1	CKA2
BnaC07g36540D	GSBRNA2T00156903001	chrC07	38580586	38581206	AT1G69570.1	CDF3
BnaC07g38710D	GSBRNA2T00154414001	chrC07	39980378	39982067	AT1G69570.1	CDF3
BnaC07g38990D	GSBRNA2T00154448001	chrC07	40103302	40106755	AT4G24540.1	AGL24
BnaC07g39670D	GSBRNA2T00154523001	chrC07	40402342	40402527	AT3G57390.1	AGL18
BnaC07g39990D	GSBRNA2T00154562001	chrC07	40590788	40593203	AT3G04610.1	FLK
BnaC07g41090D	GSBRNA2T00154687001	chrC07	41096336	41101563	AT2G23380.1	CLF
BnaC07g41400D	GSBRNA2T00154722001	chrC07	41297827	41302314	AT3G12810.1	PIE1
BnaC07g42420D	GSBRNA2T00099676001	chrC07	41868419	41871674	AT4G30200.2	VEL1
BnaC07g43570D	GSBRNA2T00099826001	chrC07	42574541	42578982	AT3G12810.1	PIE1
BnaC07g43590D	GSBRNA2T00099828001	chrC07	42584738	42587337	AT2G46790.1	PRR9
BnaC07g44670D	GSBRNA2T00099955001	chrC07	43127915	43130504	AT4G34000.1	ABF3
BnaC07g44870D	GSBRNA2T00099980001	chrC07	43197472	43200945	AT2G22540.1	SVP
BnaC07g45240D	GSBRNA2T00100033001	chrC07	43435659	43436792	AT5G58230.1	MSI1
BnaC07g45850D	GSBRNA2T00100101001	chrC07	43707334	43708377	AT4G35900.1	FD
BnaC07g46770D	GSBRNA2T00100217001	chrC07	44253480	44255091	AT4G36920.1	AP2
BnaC07g49020D	GSBRNA2T00006850001	chrC07_random	1705719	1707142	AT5G08330.1	CHE
BnaC07g49030D	GSBRNA2T00006851001	chrC07_random	1708131	1710950	AT3G33520.1	ARP6
BnaC07g49730D	GSBRNA2T00034572001	chrC07_random	2165039	2170980	AT5G23150.1	HUA2
BnaC07g49790D	GSBRNA2T00025013001	chrC07_random	2192003	2195564	AT3G57390.1	AGL18
BnaC07g49900D	GSBRNA2T00020288001	chrC07_random	2271203	2274832	AT5G23260.1	AGL32
BnaC07g50210D	GSBRNA2T00043863001	chrC07_random	2470705	2473554	AT2G23080.1	CKA2
BnaC07g50830D	GSBRNA2T00013759001	chrC07_random	2718657	2720342	AT3G10390.1	FLD
BnaC08g00670D	GSBRNA2T00145300001	chrC08	474420	477581	AT1G04400.2	CRY2
BnaC08g04630D	GSBRNA2T00087703001	chrC08	5238542	5240488	AT1G47250.1	PAF2
BnaC08g05920D	GSBRNA2T00153134001	chrC08	8455612	8456756	AT5G38480.1	GRF3
BnaC08g05950D	GSBRNA2T00153143001	chrC08	8529082	8530257	AT1G78300.1	GRF2
BnaC08g07750D	GSBRNA2T00140053001	chrC08	11157364	11159960	AT2G23070.1	CKA2
BnaC08g09340D	GSBRNA2T00061723001	chrC08	14152674	14155601	AT1G30970.1	SUF4
BnaC08g09470D	GSBRNA2T00061744001	chrC08	14274485	14278286	AT3G48430.1	REF6
BnaC08g10540D	GSBRNA2T00075014001	chrC08	15948005	15948850	AT4G16250.1	PHYD
BnaC08g10610D	GSBRNA2T00075005001	chrC08	16044496	16051284	AT3G10390.1	FLD
BnaC08g10770D	GSBRNA2T00076727001	chrC08	16195807	16196921	AT4G16845.1	VRN2
BnaC08g12060D	GSBRNA2T00094203001	chrC08	17306604	17308793	AT3G04610.1	FLK
BnaC08g13640D	GSBRNA2T00104704001	chrC08	18733985	18736228	AT5G04240.1	ELF6
BnaC08g13720D	GSBRNA2T00012874001	chrC08	18816600	18819476	AT5G67380.1	CKA1
BnaC08g13990D	GSBRNA2T00012844001	chrC08	18965855	18970862	AT4G34530.1	CIB1
BnaC08g15250D	GSBRNA2T00047363001	chrC08	19739842	19741185	AT4G18130.1	PHYE
BnaC08g17690D	GSBRNA2T00139647001	chrC08	21194772	21197305	AT2G23080.1	CKA2
BnaC08g18200D	GSBRNA2T00139581001	chrC08	21463954	21467401	AT2G23080.1	CKA2
BnaC08g20060D	GSBRNA2T00066656001	chrC08	22824700	22826369	AT2G38880.1	HAP3A
BnaC08g20340D	GSBRNA2T00121648001	chrC08	23076932	23078225	AT5G63470.1	HAP5C
BnaC08g20470D	GSBRNA2T00121668001	chrC08	23200536	23203782	AT2G23080.1	CKA2
BnaC08g21910D	GSBRNA2T00002041001	chrC08	24608656	24609345	AT5G39660.1	CDF2
BnaC08g22660D	GSBRNA2T00109342001	chrC08	25266534	25268311	AT1G47250.1	PAF2
BnaC08g24430D	GSBRNA2T00109108001	chrC08	26421510	26423319	AT3G53340.1	HAP3B
BnaC08g24760D	GSBRNA2T00109051001	chrC08	26691732	26693981	AT3G33520.1	ARP6
BnaC08g25110D	GSBRNA2T00109007001	chrC08	26961386	26973526	AT3G12810.1	PIE1
BnaC08g25150D	GSBRNA2T00109003001	chrC08	26991479	26995288	AT4G36920.1	AP2
BnaC08g25160D	GSBRNA2T00109002001	chrC08	26996128	26998422	AT5G23260.1	AGL32
BnaC08g25840D	GSBRNA2T00108914001	chrC08	27410509	27415629	AT3G54990.1	SMZ
BnaC08g26180D	GSBRNA2T00108851001	chrC08	27674573	27676462	AT3G47500.1	CDF3
BnaC08g27660D	GSBRNA2T00155911001	chrC08	28592332	28593802	AT3G56850.1	AREB3
BnaC08g27840D	GSBRNA2T00155890001	chrC08	28648732	28649736	AT5G13480.1	FY
BnaC08g28240D	GSBRNA2T00155839001	chrC08	28960982	28968225	AT3G12810.1	PIE1
BnaC08g28320D	GSBRNA2T00155831001	chrC08	29000189	29002340	AT3G57390.1	AGL18
BnaC08g28520D	GSBRNA2T00155802001	chrC08	29126465	29129106	AT2G23080.1	CKA2
BnaC08g28800D	GSBRNA2T00155766001	chrC08	29306269	29309852	AT4G34530.1	CIB1
BnaC08g29740D	GSBRNA2T00155640001	chrC08	29925294	29929500	AT2G43410.1	FPA
BnaC08g29980D	GSBRNA2T00155612001	chrC08	30047557	30049886	AT3G50000.1	CKA2
BnaC08g30180D	GSBRNA2T00155585001	chrC08	30147366	30149394	AT1G77300.1	EFS
BnaC08g31700D	GSBRNA2T00155389001	chrC08	30961599	30966036	AT3G47500.1	CDF3
BnaC08g31910D	GSBRNA2T00127059001	chrC08	31166424	31167302	AT1G13260.1	RAV1
BnaC08g33210D	GSBRNA2T00127223001	chrC08	31767513	31770665	AT2G25930.1	ELF3
BnaC08g33530D	GSBRNA2T00127261001	chrC08	31973313	31981868	AT3G12810.1	PIE1
BnaC08g34660D	GSBRNA2T00127399001	chrC08	32743975	32746859	AT2G23070.1	CKA2
BnaC08g34920D	GSBRNA2T00127429001	chrC08	32995398	32998881	AT2G22540.1	SVP
BnaC08g36660D	GSBRNA2T00136898001	chrC08	33810755	33813147	AT5G58230.1	MSI1
BnaC08g36680D	GSBRNA2T00136896001	chrC08	33815790	33819038	AT2G19520.1	FVE
BnaC08g37100D	GSBRNA2T00136845001	chrC08	34063832	34067118	AT2G23070.1	CKA2
BnaC08g37390D	GSBRNA2T00136808001	chrC08	34219480	34222606	AT3G50000.1	CKA2
BnaC08g37400D	GSBRNA2T00136807001	chrC08	34224453	34226953	AT1G18100.1	TSF
BnaC08g37430D	GSBRNA2T00136804001	chrC08	34235560	34238158	AT2G23080.1	CKA2
BnaC08g37740D	GSBRNA2T00136771001	chrC08	34356396	34357413	AT1G17455.1	ELF4
BnaC08g42170D	GSBRNA2T00057116001	chrC08	36475901	36480675	AT5G13480.1	FY
BnaC08g42390D	GSBRNA2T00019267001	chrC08	36594021	36596089	AT4G34530.1	CIB1
BnaC08g42650D	GSBRNA2T00019300001	chrC08	36740518	36745179	AT2G23080.1	CKA2
BnaC08g42660D	GSBRNA2T00019301001	chrC08	36746642	36751390	AT1G09570.1	PHYA
BnaC08g42880D	GSBRNA2T00019324001	chrC08	36874233	36875771	AT1G08970.1	HAP5C
BnaC08g43080D	GSBRNA2T00019345001	chrC08	36982575	36987197	AT3G12810.1	PIE1
BnaC08g43500D	GSBRNA2T00019389001	chrC08	37189772	37191723	AT2G23080.1	CKA2
BnaC08g45510D	GSBRNA2T00063990001	chrC08	38141760	38149974	AT3G12810.1	PIE1
BnaC08g46050D	GSBRNA2T00064051001	chrC08	38367870	38372089	AT2G23380.1	CLF
BnaC08g48270D	GSBRNA2T00014729001	chrC08_random	3239474	3241937	AT4G16845.1	VRN2
BnaC08g48660D	GSBRNA2T00020891001	chrC08_random	3689418	3691682	AT3G50000.1	CKA2
BnaC08g49430D	GSBRNA2T00011590001	chrC08_random	4204315	4206135	AT2G23080.1	CKA2
BnaC09g01290D	GSBRNA2T00109689001	chrC09	733693	736592	AT3G33520.1	ARP6
BnaC09g01300D	GSBRNA2T00109688001	chrC09	737178	738186	AT5G08330.1	CHE
BnaC09g02190D	GSBRNA2T00109576001	chrC09	1209436	1212932	AT2G22540.1	SVP
BnaC09g03020D	GSBRNA2T00109472001	chrC09	1712079	1713392	AT5G27220.1	FRI
BnaC09g03030D	GSBRNA2T00109471001	chrC09	1717634	1721475	AT5G27220.1	FRI
BnaC09g03040D	GSBRNA2T00109470001	chrC09	1722842	1727040	AT5G27220.1	FRI
BnaC09g03480D	GSBRNA2T00145914001	chrC09	1984757	1987968	AT2G23070.1	CKA2
BnaC09g04200D	GSBRNA2T00146006001	chrC09	2386029	2387828	AT5G24930.1	AtCOL4
BnaC09g04250D	GSBRNA2T00146012001	chrC09	2404149	2412368	AT1G04400.2	CRY2
BnaC09g04290D	GSBRNA2T00146018001	chrC09	2438580	2444933	AT1G04400.2	CRY2
BnaC09g04380D	GSBRNA2T00146028001	chrC09	2495768	2498863	AT5G24470.1	PRR5
BnaC09g04740D	GSBRNA2T00146080001	chrC09	2730141	2731253	AT2G32950.1	COP1
BnaC09g04940D	GSBRNA2T00146105001	chrC09	2855970	2856617	AT5G08330.1	CHE
BnaC09g04950D	GSBRNA2T00146106001	chrC09	2860065	2862464	AT5G23260.1	AGL32
BnaC09g05040D	GSBRNA2T00146115001	chrC09	2904908	2905660	AT5G39660.1	CDF2
BnaC09g05250D	GSBRNA2T00146143001	chrC09	3083563	3085789	AT5G61380.1	TOC1
BnaC09g05700D	GSBRNA2T00146197001	chrC09	3387975	3389841	AT4G34530.1	CIB1
BnaC09g05850D	GSBRNA2T00146222001	chrC09	3555908	3557729	AT1G69570.1	CDF3
BnaC09g06980D	GSBRNA2T00134806001	chrC09	4324701	4326461	AT5G65430.1	GRF8
BnaC09g07030D	GSBRNA2T00134814001	chrC09	4352587	4353435	AT3G47500.1	CDF3
BnaC09g07350D	GSBRNA2T00134860001	chrC09	4618340	4622197	AT5G13480.1	FY
BnaC09g07610D	GSBRNA2T00134902001	chrC09	4756803	4757477	AT3G47500.1	CDF3
BnaC09g07810D	GSBRNA2T00134931001	chrC09	4897408	4901472	AT3G12810.1	PIE1
BnaC09g08220D	GSBRNA2T00134993001	chrC09	5191418	5192776	AT1G47250.1	PAF2
BnaC09g08550D	GSBRNA2T00135027001	chrC09	5439158	5450020	AT3G12810.1	PIE1
BnaC09g08600D	GSBRNA2T00135034001	chrC09	5489196	5489822	AT5G47640.1	HAP3B
BnaC09g09140D	GSBRNA2T00035720001	chrC09	5915584	5917702	AT5G58230.1	MSI1
BnaC09g09560D	GSBRNA2T00035784001	chrC09	6200625	6201453	AT4G35900.1	FD
BnaC09g09670D	GSBRNA2T00010311001	chrC09	6311533	6313930	AT3G50000.1	CKA2
BnaC09g09710D	GSBRNA2T00002971001	chrC09	6358137	6360435	AT4G34530.1	CIB1
BnaC09g09900D	GSBRNA2T00115982001	chrC09	6545681	6548917	AT2G19520.1	FVE
BnaC09g09910D	GSBRNA2T00115981001	chrC09	6549317	6552006	AT5G58230.1	MSI1
BnaC09g11140D	GSBRNA2T00032717001	chrC09	7793129	7795917	AT3G50000.1	CKA2
BnaC09g11260D	GSBRNA2T00032740001	chrC09	7882443	7890617	AT3G48430.1	REF6
BnaC09g12040D	GSBRNA2T00000138001	chrC09	8453042	8454561	AT5G39660.1	CDF2
BnaC09g13010D	GSBRNA2T00050560001	chrC09	9570277	9573339	AT3G10390.1	FLD
BnaC09g13430D	GSBRNA2T00009204001	chrC09	10071530	10072870	AT2G28550.1	TOE1
BnaC09g15660D	GSBRNA2T00042052001	chrC09	12539702	12542245	AT2G23080.1	CKA2
BnaC09g16330D	GSBRNA2T00100852001	chrC09	13399518	13402547	AT2G23070.1	CKA2
BnaC09g17140D	GSBRNA2T00100720001	chrC09	13934890	13937004	AT5G42790.1	PAF1
BnaC09g17430D	GSBRNA2T00076919001	chrC09	14176286	14179573	AT2G33810.1	SPL
BnaC09g18700D	GSBRNA2T00021616001	chrC09	15530267	15534155	AT2G23070.1	CKA2
BnaC09g19820D	GSBRNA2T00115632001	chrC09	16920443	16924606	AT3G48430.1	REF6
BnaC09g20010D	GSBRNA2T00033516001	chrC09	17087962	17089295	AT4G34530.1	CIB1
BnaC09g20320D	GSBRNA2T00033465001	chrC09	17368804	17369486	AT5G47640.1	HAP3B
BnaC09g20350D	GSBRNA2T00033462001	chrC09	17373524	17374297	AT2G38880.1	HAP3A
BnaC09g20590D	GSBRNA2T00091393001	chrC09	17671874	17674149	AT5G27220.1	FRI
BnaC09g20660D	GSBRNA2T00091381001	chrC09	17755015	17758979	AT3G12810.1	PIE1
BnaC09g22090D	GSBRNA2T00053782001	chrC09	19226813	19228894	AT3G57390.1	AGL18
BnaC09g23670D	GSBRNA2T00071267001	chrC09	21207656	21211437	AT3G57390.1	AGL18
BnaC09g24030D	GSBRNA2T00071176001	chrC09	21901577	21903465	AT3G50000.1	CKA2
BnaC09g24720D	GSBRNA2T00107931001	chrC09	22869631	22872081	AT2G23080.1	CKA2
BnaC09g25510D	GSBRNA2T00118877001	chrC09	25053375	25056584	AT4G08920.1	CRY1
BnaC09g26140D	GSBRNA2T00071840001	chrC09	25996302	26001334	AT4G11110.1	SPA2
BnaC09g26780D	GSBRNA2T00152246001	chrC09	28110234	28113059	AT2G23070.1	CKA2
BnaC09g27080D	GSBRNA2T00152313001	chrC09	28569235	28570458	AT2G33810.1	SPL
BnaC09g27290D	GSBRNA2T00152364001	chrC09	29041826	29043953	AT4G00650.1	FRI
BnaC09g27450D	GSBRNA2T00108833001	chrC09	29249093	29254077	AT5G51230.1	EMF2
BnaC09g29770D	GSBRNA2T00059047001	chrC09	32512813	32518626	AT2G23380.1	CLF
BnaC09g32640D	GSBRNA2T00033361001	chrC09	35796727	35798212	AT5G57660.1	ATCOL5
BnaC09g33650D	GSBRNA2T00077439001	chrC09	36904956	36910199	AT1G68050.1	FKF1
BnaC09g33680D	GSBRNA2T00077435001	chrC09	36922347	36924217	AT5G58230.1	MSI1
BnaC09g34680D	GSBRNA2T00133257001	chrC09	38188096	38196319	AT3G33520.1	ARP6
BnaC09g35410D	GSBRNA2T00133143001	chrC09	38771034	38774268	AT5G60100.1	PRR3
BnaC09g35430D	GSBRNA2T00133140001	chrC09	38788784	38792270	AT5G60120.1	TOE2
BnaC09g35510D	GSBRNA2T00133129001	chrC09	38837403	38838506	AT1G69570.1	CDF3
BnaC09g37550D	GSBRNA2T00059332001	chrC09	40786171	40787887	AT5G23260.1	AGL32
BnaC09g38250D	GSBRNA2T00078518001	chrC09	41184972	41193466	AT2G23080.1	CKA2
BnaC09g38840D	GSBRNA2T00078427001	chrC09	41611048	41614074	AT3G50000.1	CKA2
BnaC09g39030D	GSBRNA2T00078397001	chrC09	41754117	41758789	AT2G33810.1	SPL
BnaC09g39190D	GSBRNA2T00078374001	chrC09	41842157	41848222	AT3G12810.1	PIE1
BnaC09g40240D	GSBRNA2T00094806001	chrC09	42751940	42753879	AT5G17690.1	LHP1
BnaC09g40510D	GSBRNA2T00094839001	chrC09	42911582	42913532	AT4G36920.1	AP2
BnaC09g41560D	GSBRNA2T00035330001	chrC09	43493304	43497194	AT5G16260.1	ELF9
BnaC09g41980D	GSBRNA2T00035274001	chrC09	43739067	43740068	AT5G15850.1	AtCOL1
BnaC09g41990D	GSBRNA2T00035272001	chrC09	43745679	43747139	AT5G15840.1	CONSTANS
BnaC09g42060D	GSBRNA2T00035264001	chrC09	43784336	43787341	AT3G57390.1	AGL18
BnaC09g46030D	GSBRNA2T00103981001	chrC09	46078053	46081145	AT4G36920.1	AP2
BnaC09g46090D	GSBRNA2T00103974001	chrC09	46112547	46118713	AT5G10450.1	GRF6
BnaC09g46110D	GSBRNA2T00103972001	chrC09	46121073	46122567	AT5G10450.1	GRF6
BnaC09g46370D	GSBRNA2T00103936001	chrC09	46254168	46257254	AT2G23080.1	CKA2
BnaC09g46500D	GSBRNA2T00016124001	chrC09	46345350	46350092	AT5G10140.1	FLC
BnaC09g46540D	GSBRNA2T00016119001	chrC09	46366645	46371180	AT5G10140.1	FLC
BnaC09g46600D	GSBRNA2T00016108001	chrC09	46412474	46415485	AT5G13480.1	FY
BnaC09g46850D	GSBRNA2T00016077001	chrC09	46501190	46503487	AT3G33520.1	ARP6
BnaC09g47560D	GSBRNA2T00015984001	chrC09	46834805	46835799	AT5G08330.1	CHE
BnaC09g47700D	GSBRNA2T00015962001	chrC09	46903590	46911669	AT5G23150.1	HUA2
BnaC09g50170D	GSBRNA2T00106916001	chrC09	48137449	48140360	AT3G12810.1	PIE1
BnaC09g50190D	GSBRNA2T00106914001	chrC09	48145933	48146988	AT3G46640.1	LUX
BnaC09g51600D	GSBRNA2T00023508001	chrC09_random	774021	776560	AT3G50000.1	CKA2
BnaC09g52760D	GSBRNA2T00005150001	chrC09_random	2230067	2231047	AT3G02520.1	GRF7
BnaC09g52890D	GSBRNA2T00098053001	chrC09_random	2620123	2622609	AT3G57390.1	AGL18
BnaC09g54720D	GSBRNA2T00030267001	chrC09_random	4387257	4389313	AT3G04610.1	FLK
BnaCnng01170D	GSBRNA2T00123442001	chrCnn_random	1341220	1346669	AT2G23380.1	CLF
BnaCnng01550D	GSBRNA2T00123491001	chrCnn_random	1664545	1666123	AT1G68840.1	TEM2
BnaCnng01710D	GSBRNA2T00123512001	chrCnn_random	1769090	1771049	AT1G69570.1	CDF3
BnaCnng02170D	GSBRNA2T00123561001	chrCnn_random	2001543	2004828	AT2G23080.1	CKA2
BnaCnng03230D	GSBRNA2T00032340001	chrCnn_random	2599836	2603756	AT5G02810.1	PRR 7
BnaCnng04010D	GSBRNA2T00032443001	chrCnn_random	3101021	3103208	AT3G44460.1	AtbZIP67
BnaCnng04050D	GSBRNA2T00085036001	chrCnn_random	3203298	3207689	AT3G12810.1	PIE1
BnaCnng04580D	GSBRNA2T00026623001	chrCnn_random	4059406	4060464	AT1G25560.1	TEM1
BnaCnng04710D	GSBRNA2T00026641001	chrCnn_random	4136520	4138099	AT4G34530.1	CIB1
BnaCnng05200D	GSBRNA2T00038835001	chrCnn_random	4854484	4855112	AT2G33810.1	SPL
BnaCnng05840D	GSBRNA2T00041333001	chrCnn_random	5376661	5378652	AT3G02520.1	GRF7
BnaCnng06510D	GSBRNA2T00051514001	chrCnn_random	5706615	5711120	AT1G08970.1	HAP5C
BnaCnng07170D	GSBRNA2T00053842001	chrCnn_random	6330989	6333614	AT2G23080.1	CKA2
BnaCnng07450D	GSBRNA2T00055278001	chrCnn_random	6780208	6782018	AT3G57390.1	AGL18
BnaCnng07900D	GSBRNA2T00062462001	chrCnn_random	7277674	7279981	AT2G23070.1	CKA2
BnaCnng09040D	GSBRNA2T00065108001	chrCnn_random	8268641	8270474	AT2G33810.1	SPL
BnaCnng09530D	GSBRNA2T00068139001	chrCnn_random	8640462	8645564	AT3G48430.1	REF6
BnaCnng10240D	GSBRNA2T00072972001	chrCnn_random	9339664	9344492	AT5G04240.1	ELF6
BnaCnng10680D	GSBRNA2T00073025001	chrCnn_random	9572005	9573076	AT5G03840.1	TFL1
BnaCnng10910D	GSBRNA2T00076141001	chrCnn_random	10123533	10125357	AT5G23260.1	AGL32
BnaCnng11040D	GSBRNA2T00076172001	chrCnn_random	10340083	10342620	AT1G30970.1	SUF4
BnaCnng12240D	GSBRNA2T00081189001	chrCnn_random	11679939	11681080	AT1G26790.1	CDF3
BnaCnng13510D	GSBRNA2T00082473001	chrCnn_random	12263114	12265791	AT3G50000.1	CKA2
BnaCnng15140D	GSBRNA2T00087312001	chrCnn_random	14107126	14109155	AT3G47500.1	CDF3
BnaCnng15880D	GSBRNA2T00088944001	chrCnn_random	14839773	14840940	AT5G63470.1	HAP5C
BnaCnng17720D	GSBRNA2T00093472001	chrCnn_random	16612901	16616751	AT3G50000.1	CKA2
BnaCnng19830D	GSBRNA2T00097726001	chrCnn_random	18563723	18568064	AT2G23070.1	CKA2
BnaCnng19880D	GSBRNA2T00097732001	chrCnn_random	18580972	18585661	AT1G09570.1	PHYA
BnaCnng20400D	GSBRNA2T00003032001	chrCnn_random	19153299	19154756	AT3G56850.1	AREB3
BnaCnng23620D	GSBRNA2T00008031001	chrCnn_random	22042868	22051591	AT3G12810.1	PIE1
BnaCnng24550D	GSBRNA2T00008696001	chrCnn_random	22992396	22995001	AT5G61850.1	LFY
BnaCnng24630D	GSBRNA2T00010246001	chrCnn_random	23084164	23087454	AT2G23070.1	CKA2
BnaCnng27030D	GSBRNA2T00014148001	chrCnn_random	25461649	25462924	AT5G44080.1	AREB3
BnaCnng27490D	GSBRNA2T00014427001	chrCnn_random	26019829	26020839	AT2G46790.1	PRR9
BnaCnng28850D	GSBRNA2T00016821001	chrCnn_random	27299258	27300802	AT1G26790.1	CDF3
BnaCnng29100D	GSBRNA2T00017356001	chrCnn_random	27570086	27572816	AT5G67380.1	CKA1
BnaCnng29230D	GSBRNA2T00017372001	chrCnn_random	27647558	27657151	AT4G24540.1	AGL24
BnaCnng29900D	GSBRNA2T00017991001	chrCnn_random	28356458	28359615	AT2G23080.1	CKA2
BnaCnng29920D	GSBRNA2T00017993001	chrCnn_random	28368739	28371124	AT4G34530.1	CIB1
BnaCnng30190D	GSBRNA2T00019493001	chrCnn_random	28661647	28662627	AT3G02520.1	GRF7
BnaCnng31360D	GSBRNA2T00020264001	chrCnn_random	29798014	29800302	AT3G21320.1	ELF3
BnaCnng31430D	GSBRNA2T00020278001	chrCnn_random	29851971	29852531	AT3G47500.1	CDF3
BnaCnng33070D	GSBRNA2T00023485001	chrCnn_random	31436211	31437602	AT1G13260.1	RAV1
BnaCnng35310D	GSBRNA2T00027470001	chrCnn_random	33597354	33598239	AT3G47500.1	CDF3
BnaCnng35780D	GSBRNA2T00028285001	chrCnn_random	34328092	34334644	AT2G23080.1	CKA2
BnaCnng35890D	GSBRNA2T00028298001	chrCnn_random	34406170	34409192	AT3G50000.1	CKA2
BnaCnng36180D	GSBRNA2T00028543001	chrCnn_random	34657077	34659285	AT5G23260.1	AGL32
BnaCnng36580D	GSBRNA2T00029846001	chrCnn_random	34967142	34969789	AT2G23080.1	CKA2
BnaCnng36860D	GSBRNA2T00029966001	chrCnn_random	35179195	35179398	AT3G57390.1	AGL18
BnaCnng36880D	GSBRNA2T00029970001	chrCnn_random	35198162	35204681	AT4G24540.1	AGL24
BnaCnng37560D	GSBRNA2T00033615001	chrCnn_random	36036057	36038332	AT3G46640.1	LUX
BnaCnng37790D	GSBRNA2T00033750001	chrCnn_random	36296782	36298079	AT1G13260.1	RAV1
BnaCnng39690D	GSBRNA2T00036087001	chrCnn_random	38274878	38277584	AT4G36920.1	AP2
BnaCnng41320D	GSBRNA2T00037875001	chrCnn_random	40108198	40110395	AT3G19290.1	ABF4
BnaCnng43250D	GSBRNA2T00040918001	chrCnn_random	42350262	42353180	AT5G61380.1	TOC1
BnaCnng44400D	GSBRNA2T00042445001	chrCnn_random	43482042	43484013	AT1G69570.1	CDF3
BnaCnng44620D	GSBRNA2T00042578001	chrCnn_random	43717213	43720007	AT3G04610.1	FLK
BnaCnng46510D	GSBRNA2T00045562001	chrCnn_random	45837550	45840230	AT2G23080.1	CKA2
BnaCnng48480D	GSBRNA2T00048117001	chrCnn_random	47781618	47785601	AT2G23080.1	CKA2
BnaCnng49300D	GSBRNA2T00051175001	chrCnn_random	48769482	48772027	AT3G57390.1	AGL18
BnaCnng49920D	GSBRNA2T00052280001	chrCnn_random	49427007	49429907	AT2G23080.1	CKA2
BnaCnng51050D	GSBRNA2T00054418001	chrCnn_random	50529616	50532598	AT2G23070.1	CKA2
BnaCnng51090D	GSBRNA2T00054438001	chrCnn_random	50588110	50591145	AT2G25930.1	ELF3
BnaCnng51540D	GSBRNA2T00054614001	chrCnn_random	51007560	51009284	AT3G47500.1	CDF3
BnaCnng52760D	GSBRNA2T00056795001	chrCnn_random	52342515	52345087	AT2G23080.1	CKA2
BnaCnng54190D	GSBRNA2T00060533001	chrCnn_random	53940642	53943895	AT2G23070.1	CKA2
BnaCnng55140D	GSBRNA2T00063632001	chrCnn_random	54985939	54987645	AT3G50000.1	CKA2
BnaCnng56130D	GSBRNA2T00066097001	chrCnn_random	56071153	56073235	AT3G57390.1	AGL18
BnaCnng57290D	GSBRNA2T00068419001	chrCnn_random	57077819	57081030	AT4G24540.1	AGL24
BnaCnng57570D	GSBRNA2T00069238001	chrCnn_random	57333439	57339013	AT3G12810.1	PIE1
BnaCnng59920D	GSBRNA2T00076539001	chrCnn_random	59697476	59698858	AT3G53340.1	HAP3B
BnaCnng60480D	GSBRNA2T00077645001	chrCnn_random	60258413	60260081	AT4G36920.1	AP2
BnaCnng61400D	GSBRNA2T00082020001	chrCnn_random	61293033	61294276	AT2G33810.1	SPL
BnaCnng61810D	GSBRNA2T00083026001	chrCnn_random	61646667	61648212	AT5G62430.1	CDF1
BnaCnng62100D	GSBRNA2T00083490001	chrCnn_random	61912835	61914148	AT5G39660.1	CDF2
BnaCnng63450D	GSBRNA2T00087759001	chrCnn_random	63359555	63360645	AT1G68840.1	TEM2
BnaCnng63700D	GSBRNA2T00088135001	chrCnn_random	63562193	63562483	AT5G15850.1	AtCOL1
BnaCnng66880D	GSBRNA2T00096575001	chrCnn_random	66566554	66568099	AT5G58230.1	MSI1
BnaCnng67920D	GSBRNA2T00098203001	chrCnn_random	67547109	67547780	AT1G69570.1	CDF3
BnaCnng68200D	GSBRNA2T00003138001	chrCnn_random	67763620	67764943	AT2G18915.2	LKP2
BnaCnng69240D	GSBRNA2T00005104001	chrCnn_random	69027483	69029573	AT5G67380.1	CKA1
BnaCnng69430D	GSBRNA2T00006886001	chrCnn_random	69298715	69300148	AT1G26790.1	CDF3
BnaCnng70020D	GSBRNA2T00007903001	chrCnn_random	70024060	70025243	AT3G47500.1	CDF3
BnaCnng71510D	GSBRNA2T00011585001	chrCnn_random	71732989	71734167	AT5G08330.1	CHE
BnaCnng71740D	GSBRNA2T00011935001	chrCnn_random	72006795	72008076	AT4G36920.1	AP2
BnaCnng72220D	GSBRNA2T00013874001	chrCnn_random	72602856	72604559	AT5G38480.1	GRF3
BnaCnng72530D	GSBRNA2T00014221001	chrCnn_random	72894924	72895665	AT1G29160.1	CDF3
BnaCnng73930D	GSBRNA2T00018081001	chrCnn_random	74650098	74652425	AT4G36920.1	AP2
BnaCnng74320D	GSBRNA2T00020030001	chrCnn_random	75183551	75185229	AT1G69570.1	CDF3
BnaCnng75710D	GSBRNA2T00023388001	chrCnn_random	76686125	76687683	AT3G47500.1	CDF3
BnaCnng76740D	GSBRNA2T00025985001	chrCnn_random	77820665	77822121	AT2G37060.1	HAP3B
BnaCnng78160D	GSBRNA2T00030424001	chrCnn_random	79749450	79749890	AT5G16260.1	ELF9
BnaCnng78420D	GSBRNA2T00033688001	chrCnn_random	80085418	80086930	AT5G61850.1	LFY
BnaCnng78500D	GSBRNA2T00033834001	chrCnn_random	80226905	80228249	AT5G61850.1	LFY
BnaUnng01460D	GSBRNA2T00053476001	chrUnn_random	1988748	1989703	AT2G40080.1	ELF4
