# Supplementary material for: Association Mapping of Flowering Time QTLs and Insight into Their Contributions to Rapeseed Growth Habits
Source: Front Plant Sci. 2016 Mar 24;7:338. doi: 10.3389/fpls.2016.00338 (PMC4805649; doi:10.3389/fpls.2016.00338)
Supplement: Supplementary file 4 [file Table4.XLSX]

## Sheet: Sheet1
Table S4.Selection regions overlaped with FTi QTLs and genes
Chromosome	Start (Mb)	End (Mb)	Mean Fst	Ovlerlap with FTi QTLs	Ovlerlap with FTi genes (gene number and accessions)
A02	2.95	5.3	0.0474089		8	BnaA02g06470D,BnaA02g06490D,BnaA02g06500D,BnaA02g07080D,BnaA02g07770D,BnaA02g07840D,BnaA02g08130D,BnaA02g08140D
A02	6.15	9.05	0.0561582	qFTi:A02:6192426-6363641, qFTi:A02:8776742-9248051	7	BnaA02g12130D,BnaA02g12280D,BnaA02g14040D,BnaA02g14180D,BnaA02g14580D,BnaA02g15390D,BnaA02g15400D
A02	9.8	10.75	0.0370614		2	BnaA02g16580D,BnaA02g16710D
A02	11	12.5	0.0472002		1	BnaA02g19190D
A02	15.75	16.25	0.0395632
A02	19.95	20.9	0.036623		1	BnaA02g27630D
A02	23.2	23.95	0.0370921		5	BnaA02g32550D,BnaA02g32950D,BnaA02g33000D,BnaA02g33010D,BnaA02g33230D
A03	0.45	1.55	0.03974		4	BnaA03g02470D,BnaA03g02820D,BnaA03g02930D,BnaA03g02990D
A03	3.45	4.4	0.037512		4	BnaA03g08030D,BnaA03g08650D,BnaA03g09070D,BnaA03g09510D
A03	10.7	11.3	0.0348071
A03	11.65	12.2	0.0323867
A03	15.6	17.45	0.0482666		7	BnaA03g33970D,BnaA03g34320D,BnaA03g34390D,BnaA03g34950D,BnaA03g35020D,BnaA03g35190D,BnaA03g35550D
A03	20.95	21.8	0.0377614		3	BnaA03g41790D,BnaA03g42250D,BnaA03g42350D
A04	4.35	4.95	0.0334648	qFTi:A04:257040-4734286
A05	3.35	3.85	0.0345191		2	BnaA05g06900D,BnaA05g06930D
A05	4.25	4.75	0.031782		3	BnaA05g08020D,BnaA05g08190D,BnaA05g08350D
A05	20.3	21.05	0.0347225		1	BnaA05g30270D
A06	5.35	5.9	0.0317144	qFTi:A06:5537013-6938228	1	BnaA06g10760D
A06	6.65	7.2	0.0321768	qFTi:A06:5537013-6938228
A06	20.6	21.3	0.0341347		1	BnaA06g30700D
A06	21.8	22.7	0.0346535		1	BnaA06g33420D
A07	8.65	9.65	0.0544125		4	BnaA07g08830D,BnaA07g08840D,BnaA07g08950D,BnaA07g09490D
A07	15.9	16.4	0.0318332	qFTi:A07:14463578-18554138	2	BnaA07g20430D,BnaA07g20620D
A07	16.55	17.4	0.0378525	qFTi:A07:14463578-18554138	1	BnaA07g22580D
A07	22.75	23.25	0.0319284		2	BnaA07g33120D,BnaA07g33460D
A08	7.1	7.6	0.0354297
A08	10	10.55	0.0338205		1	BnaA08g11120D
A08	17.4	18.35	0.0356896		5	BnaA08g25980D,BnaA08g26100D,BnaA08g26260D,BnaA08g26690D,BnaA08g26850D
A09	0.2	0.75	0.0343351		1	BnaA09g00500D
A09	2.6	4.45	0.0406151		12	BnaA09g05400D,BnaA09g05410D,BnaA09g05460D,BnaA09g05500D,BnaA09g05900D,BnaA09g06160D,BnaA09g06280D,BnaA09g07470D,BnaA09g07670D,BnaA09g08300D,BnaA09g08330D,BnaA09g08880D
A09	9	10	0.0354721	qFTi:A09:9757078-10068828	2	BnaA09g15700D,BnaA09g16340D
A09	11.9	13.1	0.0483413		2	BnaA09g18980D,BnaA09g19420D
A09	13.8	17.25	0.0582694		6	BnaA09g21280D,BnaA09g21650D,BnaA09g21830D,BnaA09g22070D,BnaA09g22690D,BnaA09g23530D
A09	21.3	21.85	0.0321981		2	BnaA09g28670D,BnaA09g28950D								AT1G35160.1	AT1G35160.1	AT5G42790.1	AT5G42790.1
A09	22.85	23.5	0.0327595
A09	28.2	29.2	0.0482499		1	BnaA09g40710D
A09	29.6	30.2	0.0328134		1	BnaA09g42530D
A10	0	2.15	0.0406476	qFTi:A10:751582-751611	7	BnaA10g00110D,BnaA10g00810D,BnaA10g01220D,BnaA10g02110D,BnaA10g02300D,BnaA10g02550D,BnaA10g03160D
A10	3.55	5.3	0.0428163		4	BnaA10g05850D,BnaA10g05920D,BnaA10g06180D,BnaA10g06740D
A10	5.45	8.15	0.047401		4	BnaA10g07680D,BnaA10g07690D,BnaA10g08130D,BnaA10g08150D
A10	8.5	10.3	0.0404418	qFTi:A10:9835903-10695100	3	BnaA10g10150D,BnaA10g11600D,BnaA10g12390D
A10	14.85	15.65	0.0360905	qFTi:A10:13375104-15191366	5	BnaA10g21750D,BnaA10g21980D,BnaA10g22080D,BnaA10g22340D,BnaA10g23140D
C01	2.55	3.15	0.035032
C01	12.8	14.15	0.0401392
C01	14.8	15.55	0.0331658		3	BnaC01g21540D,BnaC01g21860D,BnaC01g22100D
C01	16.25	16.9	0.0327625
C01	31.35	31.95	0.0333361
C01	33.95	34.5	0.0412237		1	BnaC01g35220D
C01	36.4	37.55	0.0509916
C02	3.15	3.95	0.0617883		1	BnaC02g06280D
C02	6.05	6.8	0.033224		3	BnaC02g10840D,BnaC02g10920D,BnaC02g11400D
C02	7.15	8.85	0.0451769	qFTi:C02:6956919-13653054
C02	9	10.2	0.0362839	qFTi:C02:6956919-13653054	1	BnaC02g14000D
C02	10.35	12.45	0.0585411	qFTi:C02:6956919-13653054	2	BnaC02g15480D,BnaC02g15870D
C02	13.7	14.3	0.033119
C02	22.85	27.4	0.0389134		3	BnaC02g25570D,BnaC02g27000D,BnaC02g27270D
C02	32.85	34.05	0.0787021		2	BnaC02g31600D,BnaC02g31650D
C02	35.55	36.65	0.0441938		1	BnaC02g33400D
C02	37	37.95	0.038135
C02	39.4	40.7	0.0475304	qFTi:C02:39806927-39807769
C02	40.75	41.25	0.0350872
C03	1.85	2.35	0.0316288		3	BnaC03g03940D,BnaC03g04170D,BnaC03g04330D
C03	6.1	7.75	0.0392513		1	BnaC03g12980D
C03	18.05	18.75	0.0347855	qFTi:C03:17612972-20733429
C03	21	21.55	0.0338587
C03	22.4	23.1	0.045465
C03	26	26.85	0.0344839	qFTi:C03:26469784-26484169	2	BnaC03g41330D,BnaC03g41900D
C03	34.15	35.8	0.0495393		4	BnaC03g49240D,BnaC03g49330D,BnaC03g50310D,BnaC03g50810D
C03	35.85	36.75	0.0583884
C03	46.35	47.25	0.0371653		3	BnaC03g57490D,BnaC03g57540D,BnaC03g57620D
C03	48.6	49.1	0.0315892
C03	57.15	57.8	0.0357922		2	BnaC03g67870D,BnaC03g68030D
C03	57.9	58.8	0.0342122	qFTi:C03:58161161-58296560	1	BnaC03g68710D
C03	58.95	59.65	0.0335683		2	BnaC03g69370D,BnaC03g69920D
C04	2.1	2.95	0.0370547		3	BnaC04g03080D,BnaC04g03390D,BnaC04g03900D
C04	10.45	11.85	0.0372416
C04	12.2	13.5	0.0521674		1	BnaC04g14850D
C04	40.65	41.7	0.0538738	qFTi:C04:40003810-41181656	2	BnaC04g39790D,BnaC04g40070D
C04	42.25	43.2	0.0413291		1	BnaC04g41660D
C04	48.6	49.3	0.0410434		2	BnaC04g51560D,BnaC04g51630D
C05	0	2.35	0.0339516		7	BnaC05g00870D,BnaC05g01310D,BnaC05g02020D,BnaC05g02200D,BnaC05g02520D,BnaC05g03140D,BnaC05g03160D
C05	4.9	5.6	0.0480833
C05	5.7	6.85	0.041369	qFTi:C05:6126098-6206615
C05	7.85	8.7	0.0359263
C05	37.85	38.45	0.0423484
C05	41.9	42.6	0.0375014		2	BnaC05g46740D,BnaC05g46840D
C06	1.55	2.45	0.0361393		1	BnaC06g01430D
C06	3	4.7	0.0465245		4	BnaC06g02640D,BnaC06g03690D,BnaC06g03900D,BnaC06g03910D
C06	7.4	8.45	0.0495217		2	BnaC06g07730D,BnaC06g07750D
C06	11.15	11.65	0.0317417
C06	20.6	21.55	0.0454489		1	BnaC06g18780D
C06	21.85	23.1	0.0750626		2	BnaC06g19970D,BnaC06g20480D
C06	23.4	24.1	0.0458957
C06	24.15	28.3	0.0729485		3	BnaC06g23500D,BnaC06g24150D,BnaC06g25500D
C06	28.95	30.1	0.0558639		4	BnaC06g27720D,BnaC06g27940D,BnaC06g28080D,BnaC06g28610D
C06	31.7	33.2	0.0552172		3	BnaC06g32610D,BnaC06g32640D,BnaC06g33040D
C06	34.15	35.7	0.0535313	qFTi:C06:35425630-35737902	4	BnaC06g35250D,BnaC06g37380D,BnaC06g37430D,BnaC06g37540D
C06	35.75	36.35	0.0498016		3	BnaC06g38010D,BnaC06g38720D,BnaC06g38800D
C07	12.6	13.15	0.0365994
C07	27.25	28	0.0335219	qFTi:C07:27916672-27924141	1	BnaC07g20800D
C07	28.95	30.1	0.0479709		1	BnaC07g22870D
C08	0.9	1.45	0.034641
C08	5.75	6.35	0.039687
C08	19.95	20.45	0.0486682
C08	25.5	26.05	0.0346872
C08	26.25	26.9	0.041348		2	BnaC08g24430D,BnaC08g24760D
C08	33.5	34.1	0.0337302	qFTi:C08:32935167-33635989	3	BnaC08g36660D,BnaC08g36680D,BnaC08g37100D
C09	1.45	2.15	0.0539213		4	BnaC09g03020D,BnaC09g03030D,BnaC09g03040D,BnaC09g03480D
C09	3.55	4.05	0.0507157		1	BnaC09g05850D
C09	7.7	8.7	0.0413921		3	BnaC09g11140D,BnaC09g11260D,BnaC09g12040D
C09	12.15	13.3	0.042355		1	BnaC09g15660D
C09	37.75	38.6	0.0478516		1	BnaC09g34680D
C09	38.85	40.3	0.0671188	qFTi:C09:39312343-43429210
C09	41.55	43.4	0.038743	qFTi:C09:39312343-43429210	5	BnaC09g38840D,BnaC09g39030D,BnaC09g39190D,BnaC09g40240D,BnaC09g40510D
C09	44.1	44.9	0.031595
C09	46.4	47.15	0.0352039		4	BnaC09g46600D,BnaC09g46850D,BnaC09g47560D,BnaC09g47700D
C09	47.3	48.45	0.0514645		2	BnaC09g50170D,BnaC09g50190D
